# Supplementary material for: HDA6-dependent histone deacetylation regulates mRNA polyadenylation in Arabidopsis
Source: PubMed Central journal article supplement — Genome Res. 2020 Oct;30(10):1407–17. doi: 10.1101/gr.255232.119 (PMC7605263; doi:10.1101/gr.255232.119), 2020-10
Supplement: supp_gr.255232.119_Supplemental_Fig_S1.pdf [file supp_gr.255232.119_Supplemental_Fig_S1.pdf]

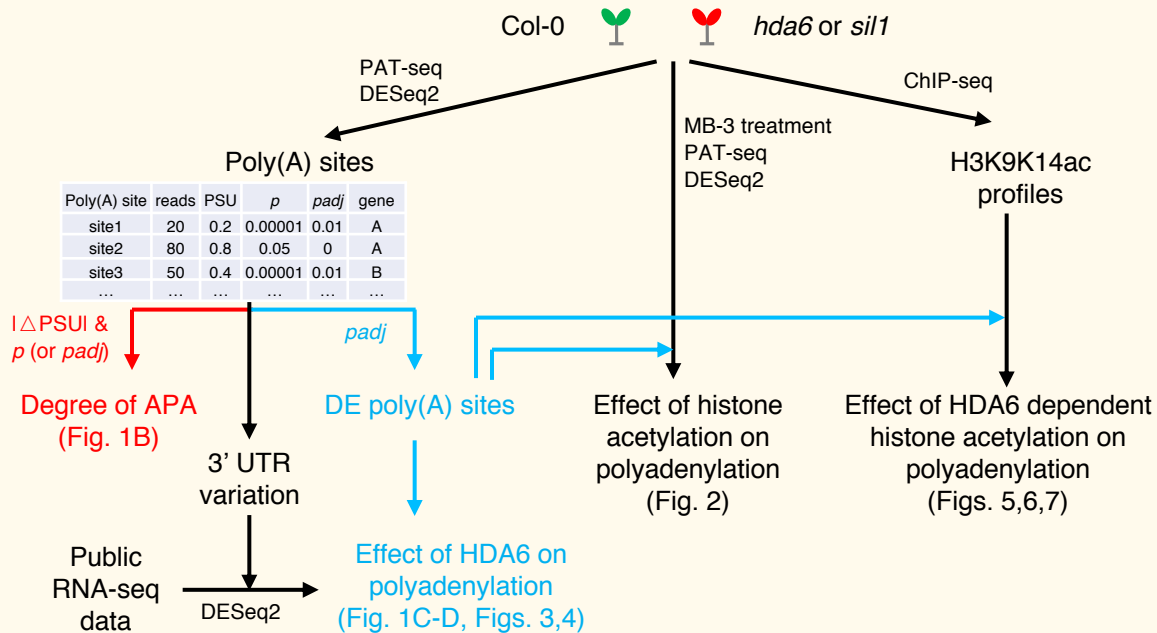

**Supplemental Fig S1. Experimental and computational analysis scheme of this study.** PSU: poly(A) site usage; DE: differential expression; APA: alternative polyadenylation. MB-3: histone acetyltransferase inhibitor.
