# Supplementary material for: HDA6-dependent histone deacetylation regulates mRNA polyadenylation in Arabidopsis
Source: PubMed Central journal article supplement — Genome Res. 2020 Oct;30(10):1407–17. doi: 10.1101/gr.255232.119 (PMC7605263; doi:10.1101/gr.255232.119), 2020-10
Supplement: supp_gr.255232.119_Supplemental_Fig_S3.pdf [file supp_gr.255232.119_Supplemental_Fig_S3.pdf]

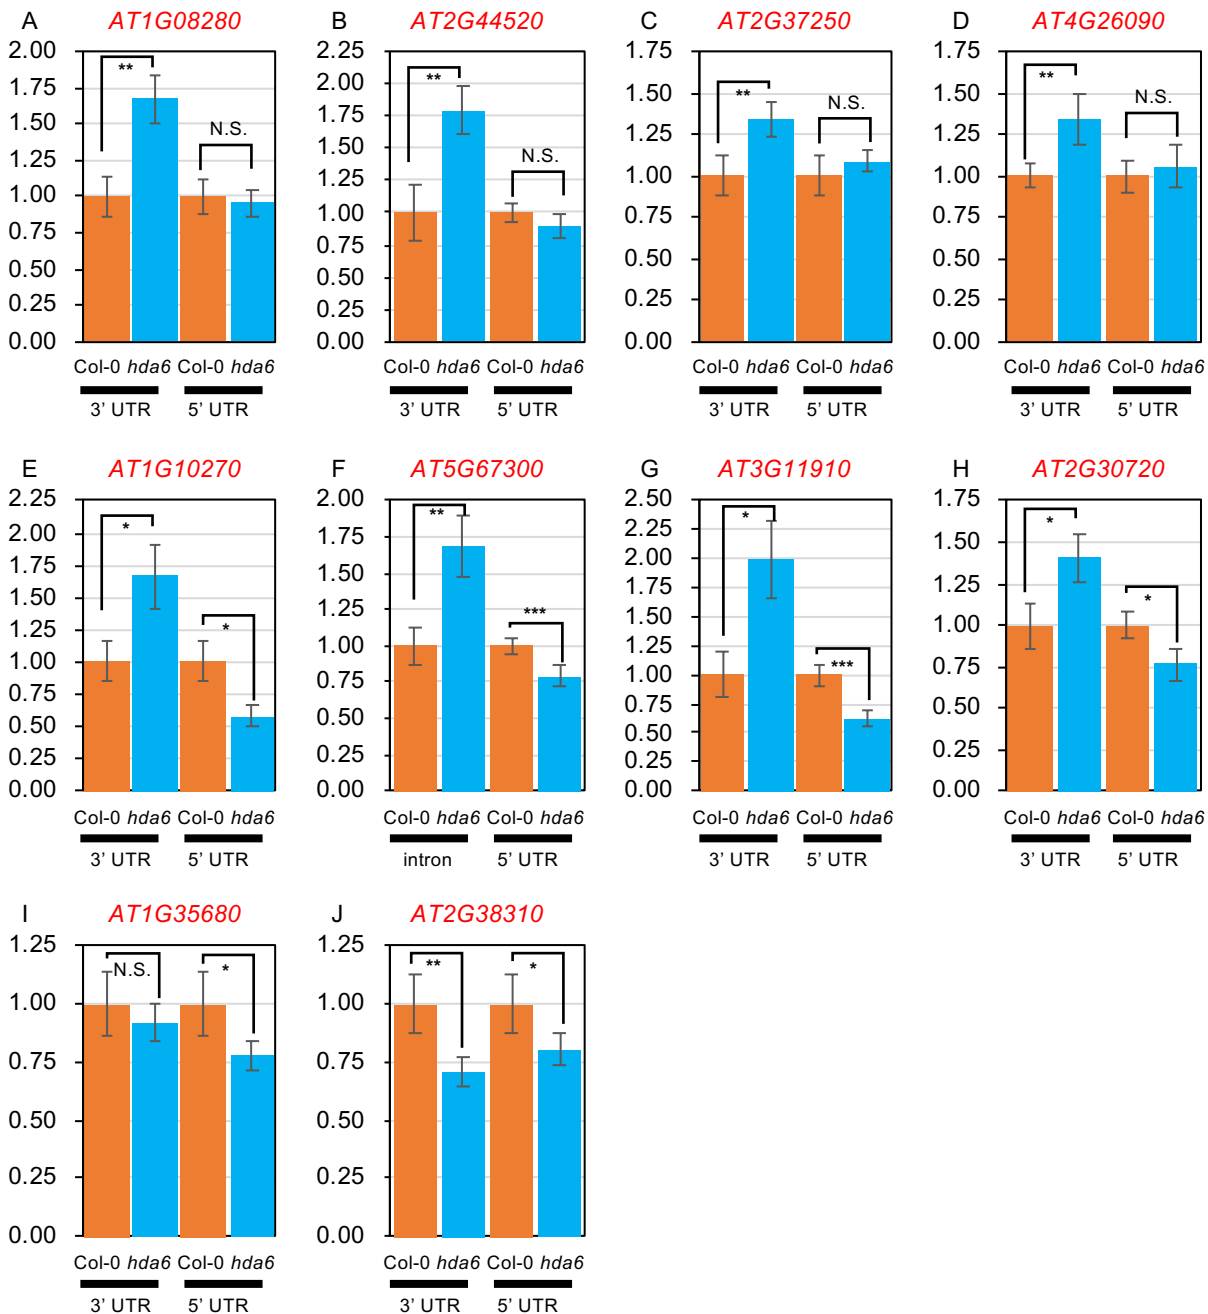

**Supplemental Fig S3. RT-qPCR validation of DE and Non-DE poly(A) sites identified by DESeq2.** A-H, genes with DE poly(A) site. I-J, genes with non-DE poly(A) site (as controls herein). Genes were randomly selected from lists of DE or non-DE poly(A) site genes. Primers were designed on 3' UTR or intron to quantify DE poly(A) site, and on 5' UTR to quantify total gene expression. Three biological replicates were performed. Expression values in Col-0 were normalized to 1. \*\*\* indicates  $p < 0.001$ , \*\* indicates  $p < 0.01$ , \* indicates  $p < 0.05$ , and N.S. indicates no significant difference. Error bars represent standard error.
