# Supplementary material for: HDA6-dependent histone deacetylation regulates mRNA polyadenylation in Arabidopsis
Source: PubMed Central journal article supplement — Genome Res. 2020 Oct;30(10):1407–17. doi: 10.1101/gr.255232.119 (PMC7605263; doi:10.1101/gr.255232.119), 2020-10
Supplement: supp_gr.255232.119_Supplemental_Fig_S4.pdf [file supp_gr.255232.119_Supplemental_Fig_S4.pdf]

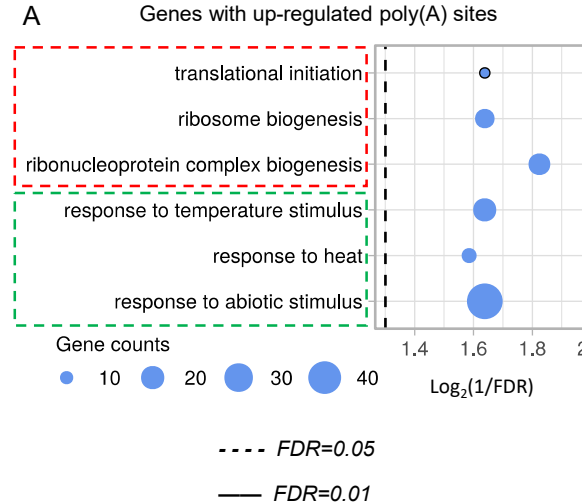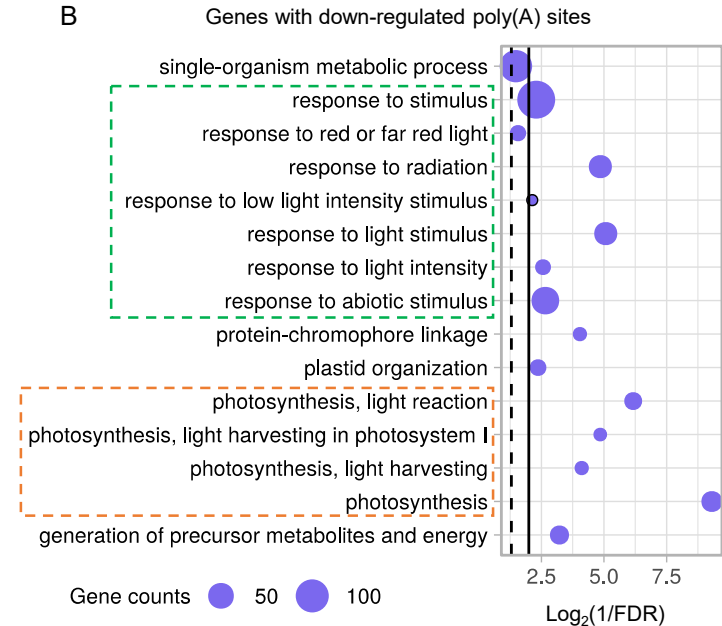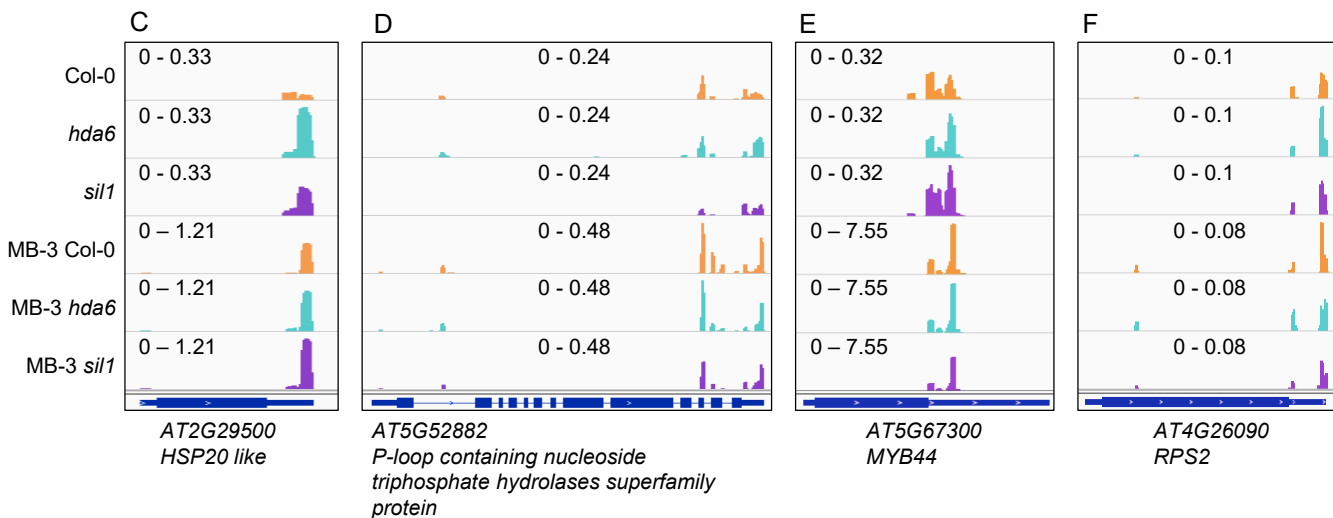

**Supplemental Fig S4. Gene Ontology enrichments of genes with up- and down- regulated poly(A) sites.** A and B, GO enrichments of genes with up- and down- regulated poly(A) sites, respectively. C-F, PAT-seq tracks of example APA genes. Sequencing coverage scales are indicated on each panel.
