# Supplementary material for: HDA6-dependent histone deacetylation regulates mRNA polyadenylation in Arabidopsis
Source: PubMed Central journal article supplement — Genome Res. 2020 Oct;30(10):1407–17. doi: 10.1101/gr.255232.119 (PMC7605263; doi:10.1101/gr.255232.119), 2020-10
Supplement: supp_gr.255232.119_Supplemental_Fig_S5.pdf [file supp_gr.255232.119_Supplemental_Fig_S5.pdf]

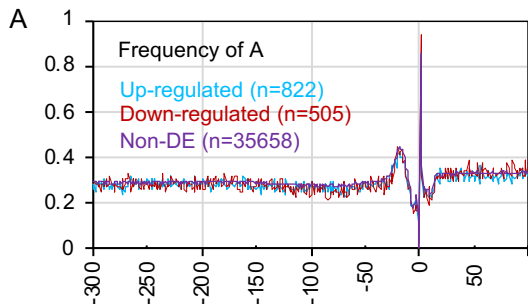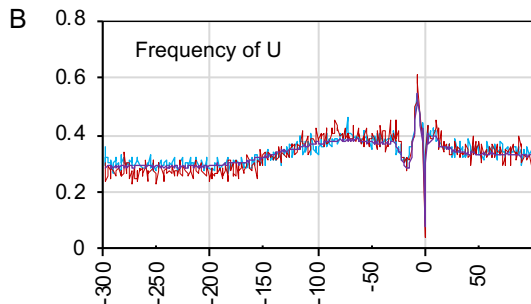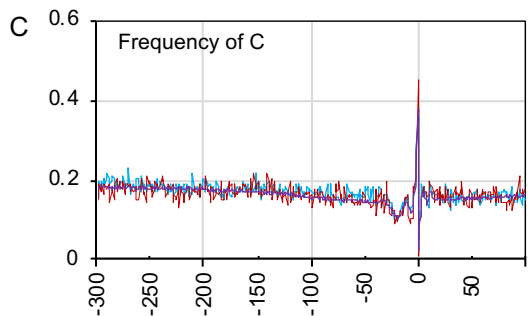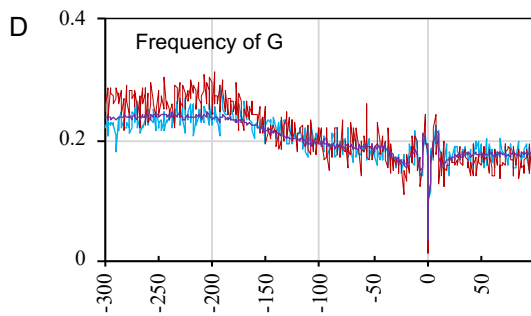

**Supplemental Fig S5. Single nucleotide usage profiles around poly(A) sites.** A, frequency of A usage. B, frequency of U usage. C, frequency of C usage. D, frequency of G usage.
