# Supplementary material for: HDA6-dependent histone deacetylation regulates mRNA polyadenylation in Arabidopsis
Source: PubMed Central journal article supplement — Genome Res. 2020 Oct;30(10):1407–17. doi: 10.1101/gr.255232.119 (PMC7605263; doi:10.1101/gr.255232.119), 2020-10
Supplement: supp_gr.255232.119_Supplemental_Fig_S7.pdf [file supp_gr.255232.119_Supplemental_Fig_S7.pdf]

A

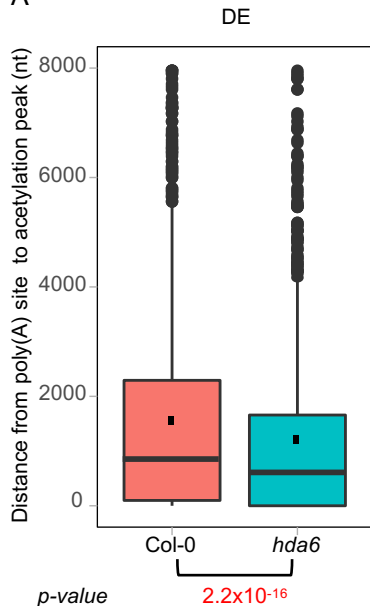

B

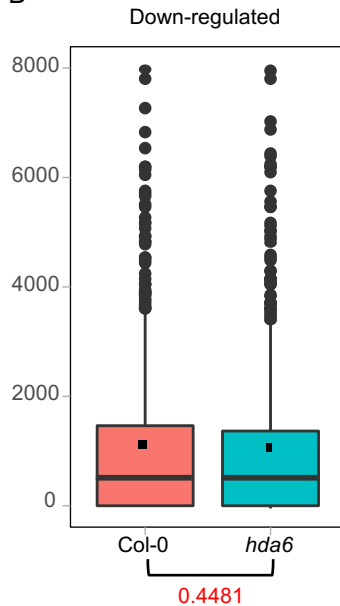

C

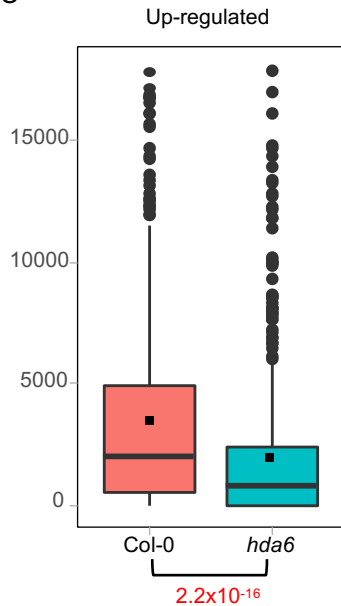

**Supplemental Fig S7. Distribution of distances between DE poly(A) sites and H3K9ac peaks.** The Wilcoxon signed-rank test was applied to calculate the statistical significance of difference between two samples. The *p*-values are indicated below the plots. A, DE poly(A) sites. B, Down-regulated poly(A) sites. C, Up-regulated poly(A) sites.
