# Supplementary material for: HDA6-dependent histone deacetylation regulates mRNA polyadenylation in Arabidopsis
Source: PubMed Central journal article supplement — Genome Res. 2020 Oct;30(10):1407–17. doi: 10.1101/gr.255232.119 (PMC7605263; doi:10.1101/gr.255232.119), 2020-10
Supplement: supp_gr.255232.119_Supplemental_Fig_S9.pdf [file supp_gr.255232.119_Supplemental_Fig_S9.pdf]

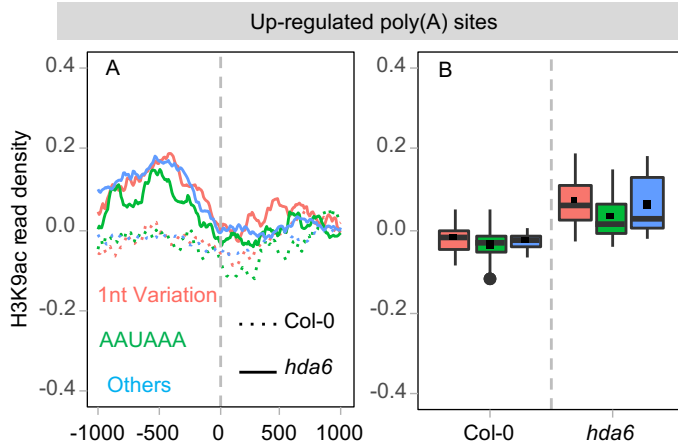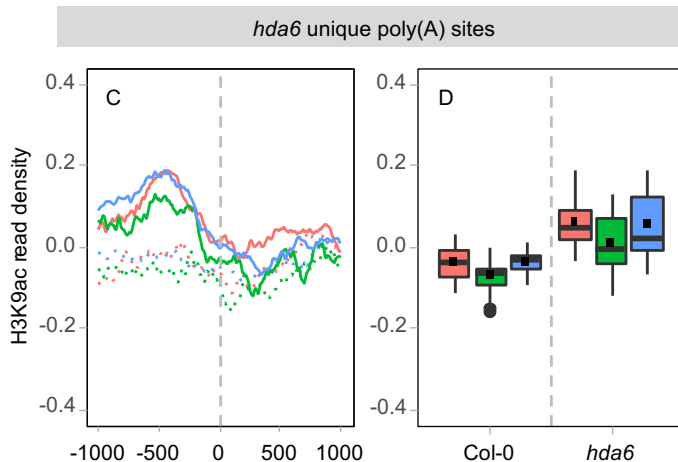

**Supplemental Fig S9. H3K9ac profiles around up-regulated poly(A) sites and *hda6* unique poly(A) sites against different poly(A) signals.** Means of H3K9ac levels at each nucleotide position from -1000 bp to 1000 bp around poly(A) sites are plotted. Black dots in boxplot indicate mean values. The Wilcoxon signed-rank test was used to evaluate the statistical significance of the acetylation profile differences across different groups, and *p* values are listed in Supplemental Table S8. A-B, Up-regulated poly(A) sites. C-D, *hda6* unique poly(A) sites.
