# Supplementary material for: HDA6-dependent histone deacetylation regulates mRNA polyadenylation in Arabidopsis
Source: PubMed Central journal article supplement — Genome Res. 2020 Oct;30(10):1407–17. doi: 10.1101/gr.255232.119 (PMC7605263; doi:10.1101/gr.255232.119), 2020-10
Supplement: supp_gr.255232.119_Supplemental_Table_S1.pdf [file supp_gr.255232.119_Supplemental_Table_S1.pdf]

Supplemental Table S1. Significant APA genes with  $|\Delta PSU| \geq 0.2$  and  $p_{adj} < 0.05$ 

| Locus Identifier | Gene Model Description                                                                                                          | Gene Model Type           | All Gene Symbols |
|------------------|---------------------------------------------------------------------------------------------------------------------------------|---------------------------|------------------|
| AT4G26810        | SWIB/MDM2 domain superfamily protein                                                                                            | protein_coding            |                  |
| AT5G02540        | NAD(P)-binding Rossmann-fold superfamily protein                                                                                | protein_coding            |                  |
| AT5G61530        | small G protein family protein / RhoGAP family protein                                                                          | protein_coding            |                  |
| AT1G26300        | BSD domain-containing protein                                                                                                   | protein_coding            |                  |
| AT3G58200        | TRAF-like family protein                                                                                                        | protein_coding            |                  |
| AT3G47040        | Glycosyl hydrolase family protein                                                                                               | protein_coding            |                  |
| AT3G04450        | Homeodomain-like superfamily protein                                                                                            | protein_coding            |                  |
| AT4G10890        | DDE family endonuclease                                                                                                         | protein_coding            |                  |
| AT3G09925        | Pollen Ole e 1 allergen and extensin family protein                                                                             | protein_coding            |                  |
| AT1G64180        | intracellular protein transport protein USO1-like protein                                                                       | protein_coding            |                  |
| AT3G01516        | transmembrane protein                                                                                                           | protein_coding            |                  |
| AT1G10780        | F-box/RNI-like superfamily protein                                                                                              | protein_coding            |                  |
| AT4G00750        | S-adenosyl-L-methionine-dependent methyltransferases superfamily protein                                                        | protein_coding            |                  |
| AT3G56210        | ARM repeat superfamily protein                                                                                                  | protein_coding            |                  |
| AT3G54000        | TIP41-like protein                                                                                                              | protein_coding            |                  |
| AT4G01570        | Tetratricopeptide repeat (TPR)-like superfamily protein                                                                         | protein_coding            |                  |
| AT4G03935        | None                                                                                                                            | other_rna                 |                  |
| AT3G23740        | hypothetical protein                                                                                                            | protein_coding            |                  |
| AT3G44120        | F-box and associated interaction domains-containing protein                                                                     | protein_coding            |                  |
| AT3G55910        | ADP-ribosylation factor GTPase-activating protein                                                                               | protein_coding            |                  |
| AT3G15518        | hypothetical protein                                                                                                            | protein_coding            |                  |
| AT3G49710        | Pentatricopeptide repeat (PPR) superfamily protein                                                                              | protein_coding            |                  |
| AT2G04378        | Beta-galactosidase related protein                                                                                              | protein_coding            |                  |
| AT2G26630        | transposable_element_gene;transposase IS4 family protein, contains Pfam profile: PF01609 transposase DDE domain;(source:TAIR10) | transposable_element_gene |                  |

|           |                                                                                                                                                                                                                                                                             |                |                                                                                                                                                                     |
|-----------|-----------------------------------------------------------------------------------------------------------------------------------------------------------------------------------------------------------------------------------------------------------------------------|----------------|---------------------------------------------------------------------------------------------------------------------------------------------------------------------|
| AT4G32440 | Plant Tudor-like RNA-binding protein                                                                                                                                                                                                                                        | protein_coding |                                                                                                                                                                     |
| AT1G34315 | transmembrane protein                                                                                                                                                                                                                                                       | protein_coding |                                                                                                                                                                     |
| AT1G63855 | Putative methyltransferase family protein                                                                                                                                                                                                                                   | protein_coding |                                                                                                                                                                     |
| AT1G52060 | Mannose-binding lectin superfamily protein                                                                                                                                                                                                                                  | protein_coding |                                                                                                                                                                     |
| AT2G29500 | HSP20-like chaperones superfamily protein                                                                                                                                                                                                                                   | protein_coding | (HSP17.6B)                                                                                                                                                          |
| AT1G06490 | Encodes Callose Synthase 7 (CalS7), a phloem-specific callose synthase responsible for callose deposition in developing sieve elements during phloem formation and in mature phloem induced by wounding.                                                                    | protein_coding | ARABIDOPSIS THALIANA<br>GLUCAN SYNTHASE-LIKE 7 (ATGSL07); (gsl07);CALLOSE SYNTHASE 7 (CalS7);GLUCAN SYNTHASE-LIKE 7 (GSL07);GLUCAN SYNTHASE-LIKE 7 (GSL7); (atgsl7) |
| AT4G25830 | Uncharacterized protein family (UPF0497)                                                                                                                                                                                                                                    | protein_coding | CASP-LIKE PROTEIN 2C1 (CASPL2C1)                                                                                                                                    |
| AT2G21730 | cinnamyl alcohol dehydrogenase homolog 2                                                                                                                                                                                                                                    | protein_coding | CINNAMYL ALCOHOL DEHYDROGENASE HOMOLOG 2 (CAD2); (ATCAD2)                                                                                                           |
| AT3G60620 | cytidinediphosphate diacylglycerol synthase 5                                                                                                                                                                                                                               | protein_coding | CYTIDINEDIPHOSPHATE DIACYLGLYCEROL SYNTHASE 5 (CDS5)                                                                                                                |
| AT2G44520 | cytochrome c oxidase 10                                                                                                                                                                                                                                                     | protein_coding | CYTOCHROME C OXIDASE 10 (COX10)                                                                                                                                     |
| AT5G61600 | encodes a member of the ERF (ethylene response factor) subfamily B-3 of ERF/AP2 transcription factor family. The protein contains one AP2 domain. There are 18 members in this subfamily including ATERF-1, ATERF-2, AND ATERF-5. Involved in regulating root architecture. | protein_coding | ETHYLENE RESPONSE FACTOR 104 (ERF104)                                                                                                                               |
| AT1G10270 | glutamine-rich protein 23                                                                                                                                                                                                                                                   | protein_coding | GLYCINE-RICH PROTEIN 23 (GRP23);GLUTAMINE-RICH PROTEIN 23 (GRP23)                                                                                                   |
| AT1G02950 | Encodes glutathione transferase belonging to the phi class of GSTs. Naming convention according to Wagner et al. (2002).                                                                                                                                                    | protein_coding | GLUTATHIONE S-TRANSFERASE F4 (ATGSTF4);GLUTATHIONE S-TRANSFERASE F4 (GSTF4);GLUTATHIONE S-TRANSFERASE 31 (GST31)                                                    |

|           |                                                                                                                                                                                                                                                                                                                                                                                                                                |                |                                                                       |
|-----------|--------------------------------------------------------------------------------------------------------------------------------------------------------------------------------------------------------------------------------------------------------------------------------------------------------------------------------------------------------------------------------------------------------------------------------|----------------|-----------------------------------------------------------------------|
| AT5G41080 | Encodes a member of the glycerophosphodiester phosphodiesterase (GDPD) family.                                                                                                                                                                                                                                                                                                                                                 | protein_coding | (AtGDPD2);GLYCEROPHOSPHO<br>DIESTER<br>PHOSPHODIESTERASE 2<br>(GDPD2) |
| AT1G08280 | Encodes a glycosyltransferase (GT) GALT29A, which belongs to the Carbohydrate Active Enzyme family GT29. GALT29A co-expresses with other arabinogalactan GTs, GALT31A and GLCAT14A. The recombinant GALT29A expressed in <i>Nicotiana benthamiana</i> demonstrated a galactosyltransferase activity, transferring galactose from UDP-galactose to a mixture of various oligosaccharides derived from arabinogalactan proteins. | protein_coding | GLYCOSYLTRANSFERASE 29A<br>(GALT29A)                                  |
| AT1G71920 | Encodes a protein that is believed to act as a histidinol-phosphate transaminase involved in histidine biosynthesis. If the gene encoding the other protein shown to have this function, HISN6A (AT5G10330), is disrupted, a residual level of histidine biosynthesis continues, suggesting that HISN6B can somewhat compensate for the loss of HISN6A.                                                                        | protein_coding | HISTIDINE BIOSYNTHESIS 6B<br>(HISN6B)                                 |
| AT1G18670 | Encodes a cyclin-dependent kinase-like protein with a ser/thr protein kinase domain and an N-terminal myristoylation sequence. Mutants in this gene are unable to express female sterility in response to beta-aminobutyric acid, as wild type plants do.                                                                                                                                                                      | protein_coding | IMPAIRED IN BABA-INDUCED<br>STERILITY 1 (IBS1)                        |
| AT3G27940 | LOB domain-containing protein 26                                                                                                                                                                                                                                                                                                                                                                                               | protein_coding | LOB DOMAIN-CONTAINING<br>PROTEIN 26 (LBD26)                           |

|           |                                                                                                                                                                                                                                                                                                                                                                                                                                     |                |                                                                                                                                                                                                                                                                  |
|-----------|-------------------------------------------------------------------------------------------------------------------------------------------------------------------------------------------------------------------------------------------------------------------------------------------------------------------------------------------------------------------------------------------------------------------------------------|----------------|------------------------------------------------------------------------------------------------------------------------------------------------------------------------------------------------------------------------------------------------------------------|
| AT2G28230 | <p>Encodes one of the subunits of the head domain of the MEDIATOR complex. The complex conveys transcriptional signals by acting as an intermediary between transcription factors and RNA polymerase II.</p> <p>Together with MED18, MED20 is proposed to control the balance of salicylic acid and jasmonate associated defense pathways. It is involved in miRNA biogenesis by recruiting Pol II to promoters of miRNA genes.</p> | protein_coding | <p>MEDIATOR 20 (MED20);MEDIATOR 20A (MED20A)</p>                                                                                                                                                                                                                 |
| AT5G67300 | <p>Member of the R2R3 factor MYB gene family involved in mediating plant responses to a variety of abiotic stimuli. The mRNA is cell-to-cell mobile.</p>                                                                                                                                                                                                                                                                            | protein_coding | <p>(ATMYBR1);MYB DOMAIN PROTEIN R1 (MYBR1); (MYB44);ARABIDOPSIS THALIANA MYB DOMAIN PROTEIN 44 (ATMYB44) NAC DOMAIN CONTAINING PROTEIN 47 (anac047);SPEEDY HYPONASTIC GROWTH (SHYG);SPEEDY HYPONASTIC GROWTH (SHG);NAC DOMAIN CONTAINING PROTEIN 47 (NAC047)</p> |
| AT3G04070 | <p>NAC domain containing protein 47</p>                                                                                                                                                                                                                                                                                                                                                                                             | protein_coding | <p>RECOGNITION OF PERONOSPORA PARASITICA 7 (RPP7)</p>                                                                                                                                                                                                            |
| AT1G58602 | <p>LRR and NB-ARC domains-containing disease resistance protein</p> <p>A novel protein, did not show high similarity to any protein of known function; reveals a novel genetic connection between lipid synthesis and embryo development. Expressed in all tissues examined including leaves, flowers, roots, stems, and</p>                                                                                                        | protein_coding | <p>ECERIFERUM 13 (CER13);RESURRECTION1 (RST1); (CER13)</p>                                                                                                                                                                                                       |
| AT3G27670 | <p>siliques, but accumulation levels were not correlated with the degree to which different organs appeared affected by the mutation. Mutant plants showed alterations in the cuticular wax profiles and embryo development. The mRNA is cell-to-cell mobile.</p>                                                                                                                                                                   | protein_coding |                                                                                                                                                                                                                                                                  |

|           |                                                                                                                                                                                                                                                                                                                                                  |                |                                                                                         |
|-----------|--------------------------------------------------------------------------------------------------------------------------------------------------------------------------------------------------------------------------------------------------------------------------------------------------------------------------------------------------|----------------|-----------------------------------------------------------------------------------------|
| AT1G72530 | Member of MORF family consisting of of nine full-length proteins encoded in the nuclear genome. MORF proteins are required for all RNA editing events in plastids and for many, possibly also all, sites in mitochondria. Potential link between the RNA binding PPR protein and the protein contributing the enzymatic activity in RNA editing. | protein_coding | MULTIPLE ORGANELLAR RNA EDITING FACTOR 7 (MORF7);RNA EDITING-INTERACTING PROTEIN (RIP7) |
| AT2G43190 | Encodes a protein involved in rRNA but not tRNA maturation. member of SYP2 Gene Family. Over-expression of the gene in tobacco protoplasts leads to a disruption of vacuolar transport from the prevacuolar compartment (PVC) to the vacuole, but not from the Golgi apparatus to the plasma membrane.                                           | protein_coding | SIMILAR TO YEAST POP4 (POP4)                                                            |
| AT5G16830 | Ubiquitin-specific protease, which together with UBP12 deubiquitinates DA1, DAR1 and DAR2, hence reducing their peptidase activity. Works upstream of DA1, DAR1 and DAR2 to restrict their protease activity and hence fine-tune plant growth and development.                                                                                   | protein_coding | SYNTAXIN OF PLANTS 21 (SYP21); (ATSYP21); (PEP12P); (ATPEP12); (PEP12)                  |
| AT3G11910 | LUC7 related protein                                                                                                                                                                                                                                                                                                                             | protein_coding | (AtUBP13);UBIQUITIN-SPECIFIC PROTEASE 13 (UBP13)                                        |
| AT3G03340 | Acts as a xylogalacturonan xylosyltransferase within the XGA biosynthesis pathway. Involved in pectin biosynthesis.                                                                                                                                                                                                                              | protein_coding | LETHAL UNLESS CBC 7 A (LUC7A);UNFERTILIZED EMBRYO SAC 6 (UNE6)                          |
| AT5G33290 |                                                                                                                                                                                                                                                                                                                                                  | protein_coding | XYLOGALACTURONAN DEFICIENT 1 (XGD1)                                                     |

---
