# Supplementary material for: HDA6-dependent histone deacetylation regulates mRNA polyadenylation in Arabidopsis
Source: PubMed Central journal article supplement — Genome Res. 2020 Oct;30(10):1407–17. doi: 10.1101/gr.255232.119 (PMC7605263; doi:10.1101/gr.255232.119), 2020-10
Supplement: supp_gr.255232.119_Supplemental_Table_S2.pdf [file supp_gr.255232.119_Supplemental_Table_S2.pdf]

Supplemental Table S2. Primers used for RT-qPCR

| Name               | Sequence                    |
|--------------------|-----------------------------|
| AT1G08280-3UTR-F   | CTCTTTACAATTTTTAGATTTGTGTTG |
| AT1G08280-3UTR-R   | TCTGAATGATTTTGGTTTATATTGATG |
| AT1G08280-5UTR-F   | TCTTCTCTTCGCCTTCTTCG        |
| AT1G08280-5UTR-R   | TAGGTTCTCCGGGATCAATG        |
| AT1G10270-3UTR-F   | TTGCCCTTGCTTCTTCACTT        |
| AT1G10270-3UTR-R   | GAAATGGAATTTAATGTTTTGATCG   |
| AT1G10270-5UTR-F   | ACCACTACCCGTAGCCCTCT        |
| AT1G10270-5UTR-R   | GAGGGGTGTGATTCTGAGGA        |
| AT2G44520-3UTR-F   | GAATTTTTGGAAACAGAAATTA AAA  |
| AT2G44520-3UTR-R   | AAATACATAAACTTGTATGCGTTCTCC |
| AT2G44520-5UTR-F   | TGTGGCGAAGATCTGTTGTT        |
| AT2G44520-5UTR-R   | GGAGGCTGGGAGAAGCTATT        |
| AT3G11910-intron-F | TGTTTCCCTTTTCTCCCAA         |
| AT3G11910-intron-R | TCTTCTTTCGTGACCCGTTT        |
| AT3G11910-5UTR-F   | AAGCGATTGATCTCTCCTTCTG      |
| AT3G11910-5UTR-R   | GTAGAAGAGAGCGCCGAACA        |
| AT5G67300-3UTR-F   | TTTTTCTCCTTTGGATTAGGC       |
| AT5G67300-3UTR-R   | TCTTCGTCTTCGTCACTACGTC      |
| AT5G67300-5UTR-F   | GGTCCATGGAGTCCTGAAGA        |
| AT5G67300-5UTR-R   | GACACGATTTCCCCGATCTA        |
| AT4G26090-3UTR-F   | ATCCGGTGAAATTGCAGAAC        |
| AT4G26090-3UTR-R   | TGATCCACCATGAAATTTGG        |
| AT4G26090-5UTR-F   | AGCATGCAAACAACAGTTCG        |
| AT4G26090-5UTR-R   | TCGATGATTTCTCGCTCTTTC       |
| AT2G37250-3UTR-F   | AGAAACAGTCTGTCGCAGCA        |
| AT2G37250-3UTR-R   | CCGGCTGGTGGAAAAATAAT        |
| AT2G37250-5UTR-F   | AGTGCGTGTGGCTAGATCCT        |
| AT2G37250-5UTR-R   | TCCTTTTCCAACACCAGGAC        |
| AT2G30720-3UTR-F   | TGATCATTCTTTCCTCTGTGA       |
| AT2G30720-3UTR-R   | CACAACAAATGAACGAAGTATATGA   |
| AT2G30720-5UTR-F   | GGGAAAGCTTCTCTCCCAT         |
| AT2G30720-5UTR-R   | AATTGGTTTCCGCATTGAAG        |
| AT1G35680-3UTR-F   | ACCGGAATCACAGGGTATGA        |
| AT1G35680-3UTR-R   | TGATCAAAGAATGGCAAAGG        |
| AT1G35680-5UTR-F   | AATGTCAATTCTCGCCGTTT        |
| AT1G35680-5UTR-R   | ACGCAGTGGAAGGAGAAAGA        |
| AT2G38310-3UTR-F   | CGTTGTCGGGTAGTTTCGTT        |
| AT2G38310-3UTR-R   | AGGGCTATCCAAATCGGTTC        |
| AT2G38310-5UTR-F   | AACTTTTCGCAAGTCGCTGT        |
| AT2G38310-5UTR-R   | GGCAAGCATGTTGATCTGAG        |
| Tubulin-F-qRT      | GCCAATCCGGTGCTGGTAACA       |
| Tubulin-R-qRT      | CATACCAGATCCAGTTCCTCCTCCC   |
