# Supplementary material for: HDA6-dependent histone deacetylation regulates mRNA polyadenylation in Arabidopsis
Source: PubMed Central journal article supplement — Genome Res. 2020 Oct;30(10):1407–17. doi: 10.1101/gr.255232.119 (PMC7605263; doi:10.1101/gr.255232.119), 2020-10
Supplement: supp_gr.255232.119_Supplemental_Table_S5.pdf [file supp_gr.255232.119_Supplemental_Table_S5.pdf]

Supplemental Table S5. *P* values of Wilcoxon signed-rank test in Fig 6.

| sample or comparison group | class or comparison group          | rep1 <i>p</i> value     | rep2 <i>p</i> value     |
|----------------------------|------------------------------------|-------------------------|-------------------------|
| <i>hda6</i>                | DE vs <i>hda6</i> unique           | $< 2.2 \times 10^{-16}$ | $< 2.2 \times 10^{-16}$ |
|                            | Up-regulated vs <i>hda6</i> unique | $< 2.2 \times 10^{-16}$ | $< 2.2 \times 10^{-16}$ |
|                            | DE vs Up-regulated                 | $1.94 \times 10^{-8}$   | $6.24 \times 10^{-13}$  |
|                            | Col-0 unique vs nonDE              | $< 2.2 \times 10^{-16}$ | $< 2.2 \times 10^{-16}$ |
|                            | Down-regulated vs nonDE            | $5.91 \times 10^{-11}$  | $1.18 \times 10^{-15}$  |
|                            | Col-0 unique vs down-regulated     | 0.0003073               | 0.0009999               |
| Col-0                      | DE vs <i>hda6</i> unique           | $< 2.2 \times 10^{-16}$ | $< 2.2 \times 10^{-16}$ |
|                            | Up-regulated vs <i>hda6</i> unique | $< 2.2 \times 10^{-16}$ | $< 2.2 \times 10^{-16}$ |
|                            | DE vs Up-regulated                 | $< 2.2 \times 10^{-16}$ | $< 2.2 \times 10^{-16}$ |
|                            | Col-0 unique vs nonDE              | $< 2.2 \times 10^{-16}$ | $< 2.2 \times 10^{-16}$ |
|                            | Down-regulated DE vs nonDE         | $< 2.2 \times 10^{-16}$ | $< 2.2 \times 10^{-16}$ |
|                            | Col-0 unique vs down-regulated     | 0.003017                | 0.256                   |
| <i>hda6</i> vs Col-0       | DE                                 | $< 2.2 \times 10^{-16}$ | $< 2.2 \times 10^{-16}$ |
|                            | Up-regulated                       | $< 2.2 \times 10^{-16}$ | $< 2.2 \times 10^{-16}$ |
|                            | <i>hda6</i> unique                 | $< 2.2 \times 10^{-16}$ | $< 2.2 \times 10^{-16}$ |
|                            | Col-0 unique                       | $< 2.2 \times 10^{-16}$ | $< 2.2 \times 10^{-16}$ |
|                            | Down-regulated                     | $< 2.2 \times 10^{-16}$ | $< 2.2 \times 10^{-16}$ |
|                            | nonDE                              | $< 2.2 \times 10^{-16}$ | $< 2.2 \times 10^{-16}$ |
