# Supplementary material for: HDA6-dependent histone deacetylation regulates mRNA polyadenylation in Arabidopsis
Source: PubMed Central journal article supplement — Genome Res. 2020 Oct;30(10):1407–17. doi: 10.1101/gr.255232.119 (PMC7605263; doi:10.1101/gr.255232.119), 2020-10
Supplement: supp_gr.255232.119_Supplemental_Table_S6.pdf [file supp_gr.255232.119_Supplemental_Table_S6.pdf]

Supplemental Table S6. *P* values of Wilcoxon signed-rank test in Supplemental Fig S8.

| sample or comparison group | class or comparison group          | <i>p</i> value          |
|----------------------------|------------------------------------|-------------------------|
| <i>hda6</i>                | DE vs <i>hda6</i> unique           | $9.13 \times 10^{-13}$  |
|                            | Up-regulated vs <i>hda6</i> unique | $4.97 \times 10^{-10}$  |
|                            | DE vs Up-regulated                 | $7.51 \times 10^{-6}$   |
|                            | Col-0 unique vs nonDE              | $< 2.2 \times 10^{-16}$ |
|                            | Down-regulated DE vs nonDE         | $2.21 \times 10^{-5}$   |
|                            | Col-0 unique vs down-regulated     | $5.92 \times 10^{-12}$  |
| Col-0                      | DE vs <i>hda6</i> unique           | $< 2.2 \times 10^{-16}$ |
|                            | Up-regulated vs <i>hda6</i> unique | $< 2.2 \times 10^{-16}$ |
|                            | DE vs Up-regulated                 | $< 2.2 \times 10^{-16}$ |
|                            | Col-0 unique vs nonDE              | $< 2.2 \times 10^{-16}$ |
|                            | Down-regulated vs nonDE            | 0.1255                  |
|                            | Col-0 unique vs down-regulated     | $8.11 \times 10^{-12}$  |
| <i>hda6</i> vs Col-0       | DE                                 | $< 2.2 \times 10^{-16}$ |
|                            | Up-regulated                       | $< 2.2 \times 10^{-16}$ |
|                            | <i>hda6</i> unique                 | $< 2.2 \times 10^{-16}$ |
|                            | Col-0 unique                       | $5.10 \times 10^{-5}$   |
|                            | Down-regulated                     | $9.89 \times 10^{-8}$   |
|                            | nonDE                              | $< 2.2 \times 10^{-16}$ |
