# Supplementary material for: HDA6-dependent histone deacetylation regulates mRNA polyadenylation in Arabidopsis
Source: PubMed Central journal article supplement — Genome Res. 2020 Oct;30(10):1407–17. doi: 10.1101/gr.255232.119 (PMC7605263; doi:10.1101/gr.255232.119), 2020-10
Supplement: supp_gr.255232.119_Supplemental_Table_S7.pdf [file supp_gr.255232.119_Supplemental_Table_S7.pdf]

Supplemental Table S7. *P* values of Wilcoxon signed-rank test in Fig 7.

| Class                | sample or comparison group | signal or comparison group | rep1 <i>p</i> value     | re2 <i>p</i> value      |                         |
|----------------------|----------------------------|----------------------------|-------------------------|-------------------------|-------------------------|
| Up-regulated         | Col-0                      | 1ntV vs AAUAAA             | $< 2.2 \times 10^{-16}$ | $< 2.2 \times 10^{-16}$ |                         |
|                      |                            | Others vs AAUAAA           | $9.29 \times 10^{-15}$  | $4.10 \times 10^{-11}$  |                         |
|                      | <i>hda6</i>                | 1ntV vs AAUAAA             | $< 2.2 \times 10^{-16}$ | $< 2.2 \times 10^{-16}$ |                         |
|                      |                            | Others vs AAUAAA           | $< 2.2 \times 10^{-16}$ | $< 2.2 \times 10^{-16}$ |                         |
|                      | <i>hda6</i> vs Col-0       | AAUAAA                     | $< 2.2 \times 10^{-16}$ | $< 2.2 \times 10^{-16}$ |                         |
|                      |                            | 1ntV                       | $< 2.2 \times 10^{-16}$ | $< 2.2 \times 10^{-16}$ |                         |
|                      |                            | Others                     | $< 2.2 \times 10^{-16}$ | $< 2.2 \times 10^{-16}$ |                         |
|                      | <i>hda6</i> unique         | Col-0                      | 1ntV vs AAUAAA          | $< 2.2 \times 10^{-16}$ | $< 2.2 \times 10^{-16}$ |
|                      |                            |                            | Others vs AAUAAA        | $< 2.2 \times 10^{-16}$ | $< 2.2 \times 10^{-16}$ |
| <i>hda6</i>          |                            | 1ntV vs AAUAAA             | $< 2.2 \times 10^{-16}$ | $< 2.2 \times 10^{-16}$ |                         |
|                      |                            | Others vs AAUAAA           | $< 2.2 \times 10^{-16}$ | $< 2.2 \times 10^{-16}$ |                         |
| <i>hda6</i> vs Col-0 |                            | AAUAAA                     | $< 2.2 \times 10^{-16}$ | $< 2.2 \times 10^{-16}$ |                         |
|                      |                            | 1ntV                       | $< 2.2 \times 10^{-16}$ | $< 2.2 \times 10^{-16}$ |                         |
|                      |                            | Others                     | $< 2.2 \times 10^{-16}$ | $< 2.2 \times 10^{-16}$ |                         |
