# Supplementary material for: HDA6-dependent histone deacetylation regulates mRNA polyadenylation in Arabidopsis
Source: PubMed Central journal article supplement — Genome Res. 2020 Oct;30(10):1407–17. doi: 10.1101/gr.255232.119 (PMC7605263; doi:10.1101/gr.255232.119), 2020-10
Supplement: supp_gr.255232.119_Supplemental_Table_S8.pdf [file supp_gr.255232.119_Supplemental_Table_S8.pdf]

Supplemental Table S8. *P* values of Wilcoxon signed-rank test in Supplemental Fig S9.

| Class                | sample or comparison group | signal or comparison group | <i>p</i> value          |                  |                         |
|----------------------|----------------------------|----------------------------|-------------------------|------------------|-------------------------|
| Up-regulated         | Col-0                      | 1ntV vs AAUAAA             | $1.65 \times 10^{-9}$   |                  |                         |
|                      |                            | Others vs AAUAAA           | $7.12 \times 10^{-4}$   |                  |                         |
|                      | <i>hda6</i>                | 1ntV vs AAUAAA             | $< 2.2 \times 10^{-16}$ |                  |                         |
|                      |                            | Others vs AAUAAA           | $< 2.2 \times 10^{-16}$ |                  |                         |
|                      | <i>hda6</i> vs Col-0       | AAUAAA                     | $< 2.2 \times 10^{-16}$ |                  |                         |
|                      |                            | 1ntV                       | $< 2.2 \times 10^{-16}$ |                  |                         |
|                      |                            | Others                     | $< 2.2 \times 10^{-16}$ |                  |                         |
|                      |                            | <i>hda6</i> unique         | Col-0                   | 1ntV vs AAUAAA   | $< 2.2 \times 10^{-16}$ |
|                      |                            |                            |                         | Others vs AAUAAA | $< 2.2 \times 10^{-16}$ |
| <i>hda6</i>          | 1ntV vs AAUAAA             |                            | $< 2.2 \times 10^{-16}$ |                  |                         |
|                      | Others vs AAUAAA           |                            | $< 2.2 \times 10^{-16}$ |                  |                         |
| <i>hda6</i> vs Col-0 | AAUAAA                     |                            | $< 2.2 \times 10^{-16}$ |                  |                         |
|                      | 1ntV                       |                            | $< 2.2 \times 10^{-16}$ |                  |                         |
|                      | Others                     | $< 2.2 \times 10^{-16}$    |                         |                  |                         |
