# Supplementary material for: HDA6-dependent histone deacetylation regulates mRNA polyadenylation in Arabidopsis
Source: HighWire-hosted journal article supplement (doi:10.1101/gr.255232.119), 2020-08-05
Supplement: Supplemental_Table_S3.xlsx [file Supplemental_Table_S3.xlsx]

## Sheet: Supplemental_Table_S3
Supplemental Table S3. Small RNA targeting predictions of 3' UTR lengthening genes in hda6
miRNA_Acc	gene	Target_Acc	Expectation	UPE	miRNA_aligned_fragment	Target_aligned_fragment	Inhibition	Target_Desc.
ath-miR408-3p	AT2G47020	Chr2:19319811-19319994	0	-1	AUGCACUGCCUCUUCCCUGGC	GCCAGGGAAGAGGCAGUGCAU	Cleavage	(-)
ath-miR408-5p	AT2G47020	Chr2:19319811-19319994	0	-1	ACAGGGAACAAGCAGAGCAUG	CAUGCUCUGCUUGUUCCCUGU	Cleavage	(-)
ath-miR5657	AT5G27660	Chr5:9789471-9789792	0	-1	UGGACAAGGUUAGAUUUGGUG	CACCAAAUCUAACCUUGUCCA	Cleavage	(-)
ath-miR403-3p	AT1G31290	Chr1:11192370-11192581	1	-1	UUAGAUUCACGCACAAACUCG	GAUGUUUGUGCGUGAAUCUAA	Cleavage	(+)
ath-miR5021	AT1G14440	Chr1:4938766-4938946	1.5	-1	UGAGAAGAAGAAGAAGAAAA	UUUUCUUCUUCUUCUUCUUC	Cleavage	(-)
ath-miR5658	AT5G15760	Chr5:5143988-5144100	1.5	-1	AUGAUGAUGAUGAUGAUGAAA	GAUCAUCAUCAUCAUCAUGAU	Cleavage	(+)
ath-miR5021	AT4G38600	Chr4:18040964-18041246	2	-1	UGAGAAGAAGAAGAAGAAAA	UUUUUUUCUUCUUCUUCUUC	Cleavage	(-)
ath-miR837-5p	AT5G55850	Chr5:22605042-22605295	2	-1	AUCAGUUUCUUGUUCGUUUCA	GAAAACGAACAAGAACUUGAU	Cleavage	(+)
ath-miR5021	AT1G33680	Chr1:12208524-12208698	2.5	-1	UGAGAAGAAGAAGAAGAAAA	UUUUUUUUUUUUUUUUUUCA	Cleavage	(+)
ath-miR5021	AT4G26000	Chr4:13199607-13199754	2.5	-1	UGAGAAGAAGAAGAAGAAAA	CUUUUUUUUUUUUUUUUUCA	Cleavage	(+)
ath-miR5021	AT5G63050	Chr5:25294847-25295003	2.5	-1	UGAGAAGAAGAAGAAGAAAA	CUUUUUUUUUUUUUUUCUUA	Cleavage	(+)
ath-miR5658	AT1G48750	Chr1:18036421-18036581	2.5	-1	AUGAUGAUGAUGAUGAUGAAA	AUUGAUGAUUAUCAUCAUCAU	Cleavage	(+)
ath-miR1886.2	AT4G23870	Chr4:12414844-12415047	3	-1	UGAGAUGAAAUCUUUGAUUGG	UUCAUCUGAGAUUUUAUCUCA	Cleavage	(+)
ath-miR2936	AT1G49850	Chr1:18455063-18455257	3	-1	CUUGAGAGAGAGAACACAGACG	UCACUGUGAUCUCUCUUUUAAU	Cleavage	(-)
ath-miR398a-3p	AT3G06370	Chr3:1930424-1930619	3	-1	UGUGUUCUCAGGUCACCCCUU	UAGGGGUGACUUGAGUACACC	Cleavage	(-)
ath-miR398b-3p	AT3G06370	Chr3:1930424-1930619	3	-1	UGUGUUCUCAGGUCACCCCUG	UAGGGGUGACUUGAGUACACC	Cleavage	(-)
ath-miR398c-3p	AT3G06370	Chr3:1930424-1930619	3	-1	UGUGUUCUCAGGUCACCCCUG	UAGGGGUGACUUGAGUACACC	Cleavage	(-)
ath-miR400	AT1G64060	Chr1:23776409-23776932	3	-1	UAUGAGAGUAUUAUAAGUCAC	GGGAGUUAUAAUAUUUUUGUA	Cleavage	(+)
ath-miR414	AT5G41860	Chr5:16758610-16758682	3	-1	UCAUCUUCAUCAUCAUCGUCA	AUGUGAAAAUGAUGAAGAUGA	Cleavage	(+)
ath-miR5014b	AT3G54060	Chr3:20018670-20018764	3	-1	AUUUGUACACCUAGAUCUGUA	AUUACAUGUAGGUGUAUAAAU	Cleavage	(-)
ath-miR5019	AT2G27228	Chr2:11653909-11654133	3	-1	UGUUGGGAAAGAAAAACUCUU	GUGUGUUUUUUUUUCUCAACU	Cleavage	(+)
ath-miR5021	AT1G55210	Chr1:20597781-20597980	3	-1	UGAGAAGAAGAAGAAGAAAA	UUUUCUUUUUUUUUUUCUUU	Cleavage	(-)
ath-miR5021	AT3G01380	Chr3:143977-144203	3	-1	UGAGAAGAAGAAGAAGAAAA	UUUUUUUUUUUUUUUUUUUA	Cleavage	(-)
ath-miR5021	AT4G37180	Chr4:17506140-17506367	3	-1	UGAGAAGAAGAAGAAGAAAA	UUUUUUUUUUUUUUUUUUUA	Cleavage	(+)
ath-miR5998a	AT2G24050	Chr2:10225293-10225387	3	-1	ACAGUUUGUGUUUUGUUUUGU	AGAAAAAAAAACACAAUUUGU	Cleavage	(-)
ath-miR5998b	AT2G24050	Chr2:10225293-10225387	3	-1	ACAGUUUGUGUUUUGUUUUGU	AGAAAAAAAAACACAAUUUGU	Cleavage	(-)
ath-miR829-3p.2	AT2G17033	Chr2:7403278-7403685	3	-1	CAAAUUAAAGCUUCAAGGUAG	UGGCUCUGGAGCUUUAGUUUG	Cleavage	(+)
ath-miR830-3p	AT3G57560	Chr3:21310828-21311022	3	-1	UAACUAUUUUGAGAAGAAGUG	UCCUUCGUCUUAAAAAAGUUA	Cleavage	(-)
ath-miR837-3p	AT1G14685	Chr1:5044077-5044354	3	-1	AAACGAACAAAAAACUGAUGG	UGCUUUGUUUUUUGUUUGUUU	Cleavage	(+)
ath-miR838	AT5G09460	Chr5:2943711-2944339	3	-1	UUUUCUUCUACUUCUUGCACA	UGUGCUUGGAGUGGAAGAAAA	Cleavage	(-)
ath-miR838	AT5G10020	Chr5:3137036-3137179	3	-1	UUUUCUUCUACUUCUUGCACA	CUUGUAA-AGGUAGAAGAAAA	Cleavage	(+)
ath-miR857	AT1G14685	Chr1:5044077-5044354	3	-1	UUUUGUAUGUUGAAGGUGUAU	UUGCAUCUAUAACAUACAAAA	Cleavage	(+)
ath-miR156i	AT5G53480	Chr5:21716752-21717881	3.5	-1	UGACAGAAGAGAGAGAGCAG	UUGUUUUUUCUUUUCUCUCA	Cleavage	(+)
ath-miR156j	AT5G53480	Chr5:21716752-21717881	3.5	-1	UGACAGAAGAGAGAGAGCAC	UUGUUUUUUCUUUUCUCUCA	Cleavage	(+)
ath-miR157d	AT5G51150	Chr5:20791574-20791776	3.5	-1	UGACAGAAGAUAGAGAGCAC	CUGUUUUUUAUUUUCUUUCA	Cleavage	(+)
ath-miR161.2	AT5G18150	Chr5:5999814-5999908	3.5	-1	UCAAUGCAUUGAAAGUGACUA	UUGUAACUUUUGAUUCAUUGA	Cleavage	(-)
ath-miR1886.1	AT1G02065	Chr1:367221-367346	3.5	-1	UGAGAGAAGUGAGAUGAAAUC	CGUUUUAUUUCAUGUCUCUCG	Cleavage	(+)
ath-miR1886.1	AT5G25280	Chr5:8774794-8775566	3.5	-1	UGAGAGAAGUGAGAUGAAAUC	AAUUUCGUUUUACUUUUUUUG	Cleavage	(+)
ath-miR1888b	AT2G45970	Chr2:18912147-18912385	3.5	-1	UUAGGCUAAGAUUUGUGAAGA	AUUUAAUAAAUCUUAUUCUAA	Cleavage	(-)
ath-miR403-5p	AT1G29810	Chr1:10435288-10435411	3.5	-1	UGUUUUGUGCUUGAAUCUAAUU	CAGGGGAUUUAAGUAUGAAACA	Cleavage	(-)
ath-miR408-5p	AT3G04130	Chr3:1085881-1086237	3.5	-1	ACAGGGAACAAGCAGAGCAUG	CAAGUUUUGUUUGUUUUCUGU	Cleavage	(+)
ath-miR5016	AT5G09672	Chr5:2995911-2996508	3.5	-1	UUCUUGUGGAUUCCUUGGAAA	UCUCCAAGUAAUUCACAUGAA	Cleavage	(-)
ath-miR5021	AT5G62680	Chr5:25165163-25165291	3.5	-1	UGAGAAGAAGAAGAAGAAAA	UUUUUUUUUUCUUCUUCUGG	Cleavage	(-)
ath-miR5021	AT1G76090	Chr1:28550477-28550569	3.5	-1	UGAGAAGAAGAAGAAGAAAA	UUUUCUUCUUCUUUCUUUCU	Cleavage	(-)
ath-miR5021	AT3G26590	Chr3:9761700-9761825	3.5	-1	UGAGAAGAAGAAGAAGAAAA	CUUUUUUUUUUUUCUUUUUU	Cleavage	(-)
ath-miR5021	AT5G23280	Chr5:7843897-7844345	3.5	-1	UGAGAAGAAGAAGAAGAAAA	UUUUCCUCUUUUUUUUUUUG	Cleavage	(+)
ath-miR5021	AT1G64060	Chr1:23776409-23776932	3.5	-1	UGAGAAGAAGAAGAAGAAAA	UUUUCUAUUUUUUUUUUUUA	Cleavage	(+)
ath-miR5021	AT2G18750	Chr2:8128368-8128620	3.5	-1	UGAGAAGAAGAAGAAGAAAA	GUUUUGGUUUCUUCUUCUCG	Cleavage	(+)
ath-miR5023	AT3G55070	Chr3:20411116-20411221	3.5	-1	AUUGGUAGUGGAUAAGGGGGC	UUCUUCUUAUCCACUAGUAGU	Cleavage	(+)
ath-miR5025	AT5G35840	Chr5:14011675-14011768	3.5	-1	ACUGUAUAUAUGUAAGUGACA	AAUUACAUAUAUAUAUAUAGG	Cleavage	(+)
ath-miR5028	AT3G03500	Chr3:834488-834581	3.5	-1	AAUUGGGUUUAUGCUAGAGUU	UUGUCUUGUGUAAACCCAGUU	Cleavage	(+)
ath-miR5632-3p	AT3G52470	Chr3:19451479-19451606	3.5	-1	UUGGAUUUAUAGUUGGAUAAG	UGGAUUUAACUGUAAAUCCAC	Cleavage	(+)
ath-miR5632-3p	AT5G09230	Chr5:2873664-2873788	3.5	-1	UUGGAUUUAUAGUUGGAUAAG	UAUCUCAAGUUGUAAAUCCAA	Cleavage	(+)
ath-miR5655	AT2G47580	Chr2:19518749-19518845	3.5	-1	AAGUAGACACAUAAGAAGGAG	GUCUUUCUUGUGUGUUUGUUG	Cleavage	(+)
ath-miR5658	AT4G04630	Chr4:2332048-2332142	3.5	-1	AUGAUGAUGAUGAUGAUGAA	AUCAUCAUCACCAUAAUUAU	Translation	(-)
ath-miR5658	AT3G52800	Chr3:19570510-19570692	3.5	-1	AUGAUGAUGAUGAUGAUGAAA	GCUUAUUAUUAUUAUUAUUGU	Cleavage	(+)
ath-miR5663-3p	AT5G40780	Chr5:16327177-16327355	3.5	-1	UGAGAAUGCAAAUCCUUAGCU	CUUUUAGGGUUUGUAUUUUCG	Cleavage	(+)
ath-miR5998a	AT5G67030	Chr5:26753580-26753698	3.5	-1	ACAGUUUGUGUUUUGUUUUGU	CUGAAACAAAAUAUAAAUUAU	Cleavage	(-)
ath-miR5998a	AT4G16155	Chr4:9153368-9153474	3.5	-1	ACAGUUUGUGUUUUGUUUUGU	UUAAAAAAAAAAACAGAUUGU	Translation	(-)
ath-miR5998b	AT5G67030	Chr5:26753580-26753698	3.5	-1	ACAGUUUGUGUUUUGUUUUGU	CUGAAACAAAAUAUAAAUUAU	Cleavage	(-)
ath-miR5998b	AT4G16155	Chr4:9153368-9153474	3.5	-1	ACAGUUUGUGUUUUGUUUUGU	UUAAAAAAAAAAACAGAUUGU	Translation	(-)
ath-miR773a	AT1G64060	Chr1:23776409-23776932	3.5	-1	UUUGCUUCCAGCUUUUGUCUC	AAGAUAAAUGAUGGAAGCAAA	Translation	(+)
ath-miR8179	AT1G23000	Chr1:8144941-8145169	3.5	-1	UGACUGCAUUAACUUGAUCGU	GAGAUCCGGUUGGUGCGGUCG	Cleavage	(+)
ath-miR829-5p	AT3G26922	Chr3:9923980-9924670	3.5	-1	ACUUUGAAGCUUUGAUUUGAA	GUGUGGUCAGAGCUUCAAAGU	Cleavage	(+)
ath-miR837-3p	AT3G17210	Chr3:5882981-5883105	3.5	-1	AAACGAACAAAAAACUGAUGG	UUCUCUCUUUUUUGUUUGUUU	Cleavage	(+)
ath-miR837-3p	AT4G34588	Chr4:16523044-16523171	3.5	-1	AAACGAACAAAAAACUGAUGG	AUUUCAAAUUUUUGUUUGUUU	Cleavage	(+)
ath-miR837-5p	AT5G09672	Chr5:2995911-2996508	3.5	-1	AUCAGUUUCUUGUUCGUUUCA	GCAGAAGAACAAGAAGAUGAU	Cleavage	(-)
ath-miR838	AT3G51950	Chr3:19277868-19278087	3.5	-1	UUUUCUUCUACUUCUUGCACA	GAUGUAAGAGAUAGGAGAAGA	Translation	(-)
ath-miR855	AT2G35530	Chr2:14922965-14923041	3.5	-1	AGCAAAAGCUAAGGAAAAGGAA	ACCCUUUUUAUUAGCUUUUCCU	Cleavage	(-)
ath-miR865-3p	AT2G01710	Chr2:316989-317064	3.5	-1	UUUUUCCUCAAAUUUAUCCAA	GUAAAUAAAAUUGAGGAAAAA	Cleavage	(+)
ath-miR868-3p	AT3G02520	Chr3:526537-526631	3.5	-1	CUUCUUAAGUGCUGAUAAUGC	UGCUUGUUAGUAUUUAGGAAG	Cleavage	(-)
ath-miR156h	AT4G17800	Chr4:9895290-9895416	4	-1	UGACAGAAGAAAGAGAGCAC	AUCCUUUUUUUUUUCUGUGA	Cleavage	(-)
ath-miR156h	AT3G04590	Chr3:1238888-1239207	4	-1	UGACAGAAGAAAGAGAGCAC	AUACUCUUUUUCUUUUCUUA	Cleavage	(-)
ath-miR158a-5p	AT5G62680	Chr5:25165163-25165291	4	-1	CUUUGUCUACAAUUUUGGAAA	UUUCUAUCAUUGUGGACAAAA	Cleavage	(-)
ath-miR171b-3p	AT5G14270	Chr5:4608698-4608906	4	-1	UUGAGCCGUGCCAAUAUCACG	UGUGAUGUUGGUACGGGUUAU	Cleavage	(+)
ath-miR171c-3p	AT5G14270	Chr5:4608698-4608906	4	-1	UUGAGCCGUGCCAAUAUCACG	UGUGAUGUUGGUACGGGUUAU	Cleavage	(+)
ath-miR173-5p	AT3G27320	Chr3:10092522-10092768	4	-1	UUCGCUUGCAGAGAGAAAUCAC	UCUUUUUCUCUCUGCGAGUAGA	Cleavage	(+)
ath-miR1886.1	AT2G25830	Chr2:11018715-11018955	4	-1	UGAGAGAAGUGAGAUGAAAUC	ACUUACAUUUCACUUCUUCUA	Cleavage	(-)
ath-miR1886.2	AT2G39930	Chr2:16672407-16672495	4	-1	UGAGAUGAAAUCUUUGAUUGG	GAAAUCAAAGUUUUCAUCUAU	Translation	(+)
ath-miR1886.2	AT4G37180	Chr4:17506140-17506367	4	-1	UGAGAUGAAAUCUUUGAUUGG	UAUAUCAAAGAUUUUGUUUUU	Cleavage	(+)
ath-miR1886.3	AT3G16500	Chr3:5612407-5612700	4	-1	AAUUAAAGAUUUCAUCUUACU	AAGAAGAUGAAAUUUUUAUUC	Cleavage	(-)
ath-miR1888b	AT5G13750	Chr5:4441347-4441521	4	-1	UUAGGCUAAGAUUUGUGAAGA	UGUUCACAAAAUUUUGUCUAA	Translation	(+)
ath-miR2112-5p	AT1G28400	Chr1:9972463-9972634	4	-1	CGCAAAUGCGGAUAUCAAUGU	ACUUUGAUGUUUGCGUUUGCA	Cleavage	(-)
ath-miR2936	AT4G18670	Chr4:10275499-10275725	4	-1	CUUGAGAGAGAGAACACAGACG	UUUUUGUGUUUUUUCUUUCUGG	Cleavage	(-)
ath-miR2936	AT5G62130	Chr5:24950369-24950649	4	-1	CUUGAGAGAGAGAACACAGACG	GUUUUUUGUUUUUGCUCUCAAG	Cleavage	(-)
ath-miR2937	AT3G58930	Chr3:21778159-21778274	4	-1	AUAAGAGCUGUUGAAGGAGUC	UUUUCCUUGGGCAGUUUUUAU	Cleavage	(-)
ath-miR3932a	AT3G21280	Chr3:7478001-7478095	4	-1	AACUUUGUGAUGACAACGAAG	UGUUGUUGUCAUUAAAAUGUU	Cleavage	(-)
ath-miR3932b-3p	AT3G21280	Chr3:7478001-7478095	4	-1	AACUUUGUGAUGACAACGAAG	UGUUGUUGUCAUUAAAAUGUU	Cleavage	(-)
ath-miR395b	AT5G46190	Chr5:18723140-18723360	4	-1	CUGAAGUGUUUGGGGGGACUC	AUCUCUCAUCAAACAUUUCGG	Cleavage	(-)
ath-miR395c	AT5G46190	Chr5:18723140-18723360	4	-1	CUGAAGUGUUUGGGGGGACUC	AUCUCUCAUCAAACAUUUCGG	Cleavage	(-)
ath-miR395f	AT5G46190	Chr5:18723140-18723360	4	-1	CUGAAGUGUUUGGGGGGACUC	AUCUCUCAUCAAACAUUUCGG	Cleavage	(-)
ath-miR399b	AT3G29030	Chr3:11011343-11011512	4	-1	UGCCAAAGGAGAGUUGCCCUG	GUUGGGGACUCUUUUUUGGUA	Cleavage	(-)
ath-miR399c-3p	AT3G29030	Chr3:11011343-11011512	4	-1	UGCCAAAGGAGAGUUGCCCUG	GUUGGGGACUCUUUUUUGGUA	Cleavage	(-)
ath-miR402	AT1G72750	Chr1:27384206-27384382	4	-1	UUCGAGGCCUAUUAAACCUCUG	GAUAGGUUUGGUAUGUCUUGGA	Cleavage	(+)
ath-miR402	AT2G22360	Chr2:9500521-9500719	4	-1	UUCGAGGCCUAUUAAACCUCUG	UUAGGUUUUAAUAGGCUUUCAA	Cleavage	(+)
ath-miR405a	AT4G00730	Chr4:299317-299661	4	-1	AUGAGUUGGGUCUAACCCAUAACU	GCGAGUGGGCGAGAUCCAACUCCU	Cleavage	(-)
ath-miR405b	AT4G00730	Chr4:299317-299661	4	-1	AUGAGUUGGGUCUAACCCAUAACU	GCGAGUGGGCGAGAUCCAACUCCU	Cleavage	(-)
ath-miR405d	AT4G00730	Chr4:299317-299661	4	-1	AUGAGUUGGGUCUAACCCAUAACU	GCGAGUGGGCGAGAUCCAACUCCU	Cleavage	(-)
ath-miR408-5p	AT1G33250	Chr1:12057249-12057391	4	-1	ACAGGGAACAAGCAGAGCAUG	ACUCUUUUGUUUGUUCCAUGU	Cleavage	(-)
ath-miR413	AT1G75340	Chr1:28268948-28269017	4	-1	AUAGUUUCUCUUGUUCUGCAC	AUGCAGA-UAACAGAAACUAU	Translation	(-)
ath-miR414	AT5G40920	Chr5:16400671-16404239	4	-1	UCAUCUUCAUCAUCAUCGUCA	GUGUGAUGAUG-UGAAGAUGA	Translation	(+)
ath-miR415	AT3G04130	Chr3:1085881-1086237	4	-1	AACAGAGCAGAAACAGAACAU	AAGUUUUGUUUGUUUUCUGUU	Translation	(+)
ath-miR415	AT4G37150	Chr4:17492877-17492946	4	-1	AACAGAGCAGAAACAGAACAU	AAGUUUUUUUAUUGUUCUGUU	Translation	(-)
ath-miR419	AT3G19990	Chr3:6967119-6967249	4	-1	UUAUGAAUGCUGAGGAUGUUG	CCACAUCCUUAAUAAUCAUAA	Translation	(+)
ath-miR419	AT1G45230	Chr1:17169548-17169859	4	-1	UUAUGAAUGCUGAGGAUGUUG	UGAAAUCUUUAGCGUUUAUAU	Cleavage	(-)
ath-miR4240	AT5G55050	Chr5:22339767-22339950	4	-1	UGACUAGACCCGUAACAUUAC	UAAGUUUUACCGGUUUAGUUA	Translation	(+)
ath-miR4245	AT4G35310	Chr4:16804722-16804975	4	-1	ACAAAGUUUUAUACUGACAAU	UCUGCCAUUGUUAAACUUUGU	Translation	(+)
ath-miR447a-3p	AT5G64630	Chr5:25836263-25836368	4	-1	UUGGGGACGAGAUGUUUUGUUG	UAGUCAUACGUCUCGUCUCUAA	Cleavage	(+)
ath-miR447b	AT5G64630	Chr5:25836263-25836368	4	-1	UUGGGGACGAGAUGUUUUGUUG	UAGUCAUACGUCUCGUCUCUAA	Cleavage	(+)
ath-miR5020a	AT1G13270	Chr1:4547241-4547360	4	-1	UGGAAGAAGGUGAGACUUGCA	CUCAAGUCUUUCUUUAUUCCA	Translation	(+)
ath-miR5020c	AT5G09460	Chr5:2943711-2944339	4	-1	UGGCAUGGAAGAAGGUGAGAC	AAGUCACUUUCUUCUGUGCUU	Cleavage	(-)
ath-miR5021	AT2G18328	Chr2:7964787-7964875	4	-1	UGAGAAGAAGAAGAAGAAAA	UUUUUUUGUUUUUUUUUUUA	Cleavage	(+)
ath-miR5021	AT5G61780	Chr5:24826749-24826885	4	-1	UGAGAAGAAGAAGAAGAAAA	UUUUUUUUUUUUUCUUAUCU	Cleavage	(+)
ath-miR5021	AT1G04760	Chr1:1336138-1336244	4	-1	UGAGAAGAAGAAGAAGAAAA	UUUCCUUCUUCUUUUAUUUA	Cleavage	(+)
ath-miR5021	AT3G07940	Chr3:2531385-2531532	4	-1	UGAGAAGAAGAAGAAGAAAA	UCUUCUUUUUUUUUUUCUUU	Cleavage	(+)
ath-miR5021	AT4G15180	Chr4:8662439-8662574	4	-1	UGAGAAGAAGAAGAAGAAAA	UCUUUUUUUUUUUUUUUUUA	Cleavage	(+)
ath-miR5021	AT5G24320	Chr5:8284478-8284826	4	-1	UGAGAAGAAGAAGAAGAAAA	UUUUUUUUUCCUUCUUUUUG	Translation	(-)
ath-miR5021	AT3G52800	Chr3:19570510-19570692	4	-1	UGAGAAGAAGAAGAAGAAAA	UUAUUUUCUUUUUCCUUUCA	Cleavage	(+)
ath-miR5021	AT1G48170	Chr1:17789742-17790000	4	-1	UGAGAAGAAGAAGAAGAAAA	UUGUUUUCUUAUUCUUCUUG	Translation	(+)
ath-miR5021	AT3G22968	Chr3:8153909-8154095	4	-1	UGAGAAGAAGAAGAAGAAAA	AUUUCUUUUUCUAAUUUUCA	Cleavage	(+)
ath-miR5021	AT3G22968	Chr3:8153909-8154095	4	-1	UGAGAAGAAGAAGAAGAAAA	UUCGCUUUUUUUUUUUCUUA	Cleavage	(+)
ath-miR5021	AT3G10650	Chr3:3325235-3325427	4	-1	UGAGAAGAAGAAGAAGAAAA	UUCGCUUCUUUUUCUUUUUG	Cleavage	(-)
ath-miR5021	AT5G47480	Chr5:19263150-19263399	4	-1	UGAGAAGAAGAAGAAGAAAA	AUUUUUUUUUUAUUUUCUUA	Cleavage	(+)
ath-miR5021	AT4G18670	Chr4:10275499-10275725	4	-1	UGAGAAGAAGAAGAAGAAAA	UGGUUAUCUUUUUCUUCUCA	Cleavage	(-)
ath-miR5021	AT2G18750	Chr2:8128368-8128620	4	-1	UGAGAAGAAGAAGAAGAAAA	CUUUCUUCUUCU-CUUCUUG	Cleavage	(+)
ath-miR5026	AT1G21590	Chr1:7566231-7566484	4	-1	ACUCAUAAGAUCGUGACACG	AUUGUCAUGGUCUCAUGGGU	Cleavage	(-)
ath-miR5632-3p	AT3G56650	Chr3:20985972-20986123	4	-1	UUGGAUUUAUAGUUGGAUAAG	UCUUUUCUACUGUAAAUUCGA	Cleavage	(+)
ath-miR5633	AT2G18162	Chr2:7898292-7898791	4	-1	UAUGAUCAUCAGAA-AACAGUG	GGCUGUGGUUUUGAUGAUCGUA	Cleavage	(-)
ath-miR5634	AT1G78300	Chr1:29463253-29463386	4	-1	AGGGACUUUGUGAAUUUAGGG	UUUGAAGAUCAUAAAGUCUCU	Cleavage	(+)
ath-miR5640	AT5G02170	Chr5:430546-430696	4	-1	UGAGAGAAGGAAUUAGAUUCA	CCAAUUUGAUUUUUUUUUUUG	Cleavage	(+)
ath-miR5640	AT3G04590	Chr3:1238888-1239207	4	-1	UGAGAGAAGGAAUUAGAUUCA	UCAAUUUCAUUCCUUUUUUUU	Cleavage	(-)
ath-miR5641	AT3G52800	Chr3:19570510-19570692	4	-1	UGGAAGAAGAUGAUAGAAUUA	UCAUUUUAUUUUCUUUUUCCU	Translation	(+)
ath-miR5645c	AT5G46410	Chr5:18828179-18829313	4	-1	AACCUAUUUAACGACAUGACU	UUUUAGGUCGUUAAUUAGGUA	Cleavage	(+)
ath-miR5648-5p	AT5G46790	Chr5:18983905-18984057	4	-1	UUUGGAAAUAUUUGGCUUGACU	GGGAAAGAAAAAUGUUUCUAAA	Cleavage	(-)
ath-miR5650	AT5G09660	Chr5:2993376-2993489	4	-1	UUGUUUUGGAUCUUAGAUACA	AAUCUUUAGGACCCAAAACAG	Translation	(-)
ath-miR5655	AT1G23310	Chr1:8268409-8268613	4	-1	AAGUAGACACAUAAGAAGGAG	CUCUCUCUUGUGUCUCUAUUU	Cleavage	(-)
ath-miR5655	AT5G23280	Chr5:7843897-7844345	4	-1	AAGUAGACACAUAAGAAGGAG	UUUUUUUUUUUGUGUCUGUUU	Cleavage	(+)
ath-miR5658	AT5G65650	Chr5:26241316-26241465	4	-1	AUGAUGAUGAUGAUGAUGAAA	UUUCACUAUCAUCAUCAUCUC	Cleavage	(+)
ath-miR5658	AT5G53480	Chr5:21716752-21717881	4	-1	AUGAUGAUGAUGAUGAUGAAA	UCACAUCAGCAUCAUCAGCAU	Cleavage	(+)
ath-miR5663-3p	AT5G07220	Chr5:2265262-2265406	4	-1	UGAGAAUGCAAAUCCUUAGCU	ACCUAAAGAUUUGGAUUUUCU	Cleavage	(-)
ath-miR5663-5p	AT1G53165	Chr1:19819351-19819547	4	-1	AGCUAAGGAUUUGCAUUCUCA	AGAGGAAGCAUAUUCUUAGUU	Translation	(+)
ath-miR5998a	AT3G51880	Chr3:19246884-19247084	4	-1	ACAGUUUGUGUUUUGUUUUGU	CCAAACCAAAACAUAAACUAA	Cleavage	(-)
ath-miR5998a	AT2G03800	Chr2:1158787-1158945	4	-1	ACAGUUUGUGUUUUGUUUUGU	GUAGAACAAAACAGAAGUUGA	Cleavage	(+)
ath-miR5998a	AT5G40770	Chr5:16315028-16315405	4	-1	ACAGUUUGUGUUUUGUUUUGU	AGAAAAGAAAAUACAGAUGGU	Cleavage	(-)
ath-miR5998a	AT3G14310	Chr3:4771871-4772129	4	-1	ACAGUUUGUGUUUUGUUUUGU	AAAAAAAAAAAGACAAACUAU	Translation	(-)
ath-miR5998a	AT2G41430	Chr2:17270455-17270539	4	-1	ACAGUUUGUGUUUUGUUUUGU	AAAAAAAAAAAUGUAAACUUU	Cleavage	(+)
ath-miR5998b	AT3G51880	Chr3:19246884-19247084	4	-1	ACAGUUUGUGUUUUGUUUUGU	CCAAACCAAAACAUAAACUAA	Cleavage	(-)
ath-miR5998b	AT2G03800	Chr2:1158787-1158945	4	-1	ACAGUUUGUGUUUUGUUUUGU	GUAGAACAAAACAGAAGUUGA	Cleavage	(+)
ath-miR5998b	AT5G40770	Chr5:16315028-16315405	4	-1	ACAGUUUGUGUUUUGUUUUGU	AGAAAAGAAAAUACAGAUGGU	Cleavage	(-)
ath-miR5998b	AT3G14310	Chr3:4771871-4772129	4	-1	ACAGUUUGUGUUUUGUUUUGU	AAAAAAAAAAAGACAAACUAU	Translation	(-)
ath-miR5998b	AT2G41430	Chr2:17270455-17270539	4	-1	ACAGUUUGUGUUUUGUUUUGU	AAAAAAAAAAAUGUAAACUUU	Cleavage	(+)
ath-miR773a	AT5G09672	Chr5:2995911-2996508	4	-1	UUUGCUUCCAGCUUUUGUCUC	GAGAACAAAGAUGGAAGCAAG	Translation	(-)
ath-miR773a	AT4G37260	Chr4:17541627-17541690	4	-1	UUUGCUUCCAGCUUUUGUCUC	ACGACGAAAGGAGGAAGCGAA	Translation	(+)
ath-miR774b-3p	AT4G13010	Chr4:7602680-7602730	4	-1	CAUCCAUAUUUUCAUCUCGAA	CAUGAAAAGAAAAUUUGGAUG	Cleavage	(+)
ath-miR774b-5p	AT4G30550	Chr4:14926790-14926927	4	-1	UGAGAUGAAGAUAUGGGUGAU	ACCACCUUUUUCUUUAUCUUA	Cleavage	(+)
ath-miR779.2	AT5G09672	Chr5:2995911-2996508	4	-1	UGAUUGGAAAUUUCGUUGACU	CAUCAAUGAAAUCUCCAAGUA	Cleavage	(-)
ath-miR779.2	AT2G17033	Chr2:7403278-7403685	4	-1	UGAUUGGAAAUUUCGUUGACU	AUUCCAUGAAGUUUCUAGUCU	Cleavage	(+)
ath-miR8165	AT3G48720	Chr3:18049340-18049465	4	-1	AAUGGAGGCAAGUGUGAAGGA	GAAUUCACGUUUGUAUCCAUU	Cleavage	(+)
ath-miR8170-3p	AT2G40550	Chr2:16938130-16938217	4	-1	UUGCUUAAAGAUUUUCUAUGU	UAAUGGAAAAUGUUUGAGAAA	Translation	(+)
ath-miR8174	AT2G20495	Chr2:8835173-8835264	4	-1	AUGUGUAUAGGGAAGCUAAUC	UGUUGGUUUACUUAUACACAG	Cleavage	(+)
ath-miR8174	AT4G22780	Chr4:11968418-11968539	4	-1	AUGUGUAUAGGGAAGCUAAUC	UAUUUUUUUCUCUGUACAUAU	Cleavage	(-)
ath-miR8177	AT3G59020	Chr3:21810279-21810682	4	-1	GUGUGAUGAUGUGUCAUUUAUA	GCUCUGUGAUAUAUCAUUACAC	Cleavage	(-)
ath-miR8182	AT1G76140	Chr1:28574998-28575088	4	-1	UUGUGUUGCGUUUCUGUUGAUU	UUACAACAGUAACACGAUACAA	Cleavage	(+)
ath-miR8183	AT1G23760	Chr1:8404189-8404310	4	-1	UUUAGUUGACGGAAU-UGUGGC	UCCUCAUAUUCUGUUAACUAAA	Cleavage	(+)
ath-miR8184	AT1G74790	Chr1:28101773-28101941	4	-1	UUUGGUCUGAUUACGAAUGUA	UUUAUGAGUAAUUAGGCCAGA	Cleavage	(+)
ath-miR822-3p	AT5G23280	Chr5:7843897-7844345	4	-1	UGUGCAAAUGCUUU-CUACAGG	AUUGUGGUGAAGCAUUUGCGUA	Cleavage	(+)
ath-miR822-5p	AT4G32600	Chr4:15725827-15726097	4	-1	UGCGGGAAGCAUUUGCACAUG	GUUCUGUAAAUGCUUUUUGCC	Cleavage	(+)
ath-miR826b	AT3G13682	Chr3:4478955-4479112	4	-1	UGGUUUUGGACACGUGAAAAU	AUUUUUAUGUUUCUAAAACUG	Translation	(-)
ath-miR830-3p	AT5G26710	Chr5:9308273-9308441	4	-1	UAACUAUUUUGAGAAGAAGUG	AGUUUCAUCUCAUAAUAGUUU	Cleavage	(+)
ath-miR833a-5p	AT4G23740	Chr4:12369231-12369334	4	-1	UGUUUGUUGUACUCGGUCUAGU	UUUAGAACCGGUUCAACAAACA	Translation	(+)
ath-miR837-3p	AT1G20330	Chr1:7038594-7038845	4	-1	AAACGAACAAAAAACUGAUGG	UUAUUAGUUUUUU-UUUGUUU	Cleavage	(-)
ath-miR837-3p	AT1G48170	Chr1:17789742-17790000	4	-1	AAACGAACAAAAAACUGAUGG	UGAUCACUUUUUUUUUGGUUU	Cleavage	(+)
ath-miR837-5p	AT4G32060	Chr4:15503504-15503618	4	-1	AUCAGUUUCUUGUUCGUUUCA	UUACACGGCUAAGAAAUUGAU	Cleavage	(+)
ath-miR838	AT1G15910	Chr1:5468942-5469208	4	-1	UUUUCUUCUACUUCUUGCACA	GAAGCAGGAAGAAGAGGAAGA	Translation	(+)
ath-miR838	AT1G23490	Chr1:8338581-8338778	4	-1	UUUUCUUCUACUUCUUGCACA	UAUGAAUCAAGUAGAGGAAAG	Cleavage	(+)
ath-miR846-3p	AT5G60270	Chr5:24259792-24259928	4	-1	UUGAAUUGAAGUGCUUGAAUU	UUUUCAGCCAUUUCUAUUCAG	Cleavage	(+)
ath-miR851-3p	AT4G16580	Chr4:9340898-9341097	4	-1	UGGGUGGCAAACAAAGACGAC	UUAGUCUUUGAUUGACACCCA	Translation	(-)
ath-miR854a	AT3G14650	Chr3:4924215-4924689	4	-1	GAUGAGGAUAGGGAGGAGGAG	UUUCUCCUUCCUAUGUUCAUG	Cleavage	(+)
ath-miR854b	AT3G14650	Chr3:4924215-4924689	4	-1	GAUGAGGAUAGGGAGGAGGAG	UUUCUCCUUCCUAUGUUCAUG	Cleavage	(+)
ath-miR854c	AT3G14650	Chr3:4924215-4924689	4	-1	GAUGAGGAUAGGGAGGAGGAG	UUUCUCCUUCCUAUGUUCAUG	Cleavage	(+)
ath-miR854d	AT3G14650	Chr3:4924215-4924689	4	-1	GAUGAGGAUAGGGAGGAGGAG	UUUCUCCUUCCUAUGUUCAUG	Cleavage	(+)
ath-miR854e	AT3G14650	Chr3:4924215-4924689	4	-1	GAUGAGGAUAGGGAGGAGGAG	UUUCUCCUUCCUAUGUUCAUG	Cleavage	(+)
ath-miR855	AT1G21090	Chr1:7386244-7386510	4	-1	AGCAAAAGCUAAGGAAAAGGAA	UCAAUGUGCCUUAGUUUUUGUU	Cleavage	(+)
ath-miR865-5p	AT5G64670	Chr5:25852234-25852407	4	-1	AUGAAUUUGGAUCUAAU-UGAG	AUCACGUUAGAUUUGAAUUCAU	Cleavage	(-)
ath-miR866-3p	AT3G54920	Chr3:20348530-20348663	4	-1	ACAAAAUCCGUCUUUGAAGA	ACGUCAAAGACGAACUUUGU	Cleavage	(+)
ath-miR869.1	AT5G04740	Chr5:1368554-1368644	4	-1	AUUGGUUCAAUUCUGGUGUUG	UGAUACUAUAAUUGAACCACU	Cleavage	(-)
ath-miR870-5p	AT5G02170	Chr5:430546-430696	4	-1	AAGAACAUCAAAUUAGAAUGU	AUAAUCCAAUUUGAUUUUUUU	Cleavage	(+)
ath-miR156a-5p	AT5G53480	Chr5:21716752-21717881	4.5	-1	UGACAGAAGAGAGUGAGCAC	UUGUUUUUUCUUUUCUCUCA	Cleavage	(+)
ath-miR156b-3p	AT4G24020	Chr4:12483885-12483970	4.5	-1	UGCUCACCUCUCUUUCUGUCAGU	UGUAAGAGAGAGAGAGGUUAGAA	Cleavage	(+)
ath-miR156b-5p	AT5G53480	Chr5:21716752-21717881	4.5	-1	UGACAGAAGAGAGUGAGCAC	UUGUUUUUUCUUUUCUCUCA	Cleavage	(+)
ath-miR156c-5p	AT5G53480	Chr5:21716752-21717881	4.5	-1	UGACAGAAGAGAGUGAGCAC	UUGUUUUUUCUUUUCUCUCA	Cleavage	(+)
ath-miR156d-3p	AT3G10050	Chr3:3098728-3098991	4.5	-1	GCUCACUCUCUUUUUGUCAUAAC	AGAAAGAUAAAGAGAGAGAGAGA	Cleavage	(-)
ath-miR156d-3p	AT2G43970	Chr2:18205274-18205488	4.5	-1	GCUCACUCUCUUUUUGUCAUAAC	AGGGAGAUAAAUAGAGAGAGAGC	Cleavage	(-)
ath-miR156d-3p	AT4G13430	Chr4:7804001-7804057	4.5	-1	GCUCACUCUCUUUUUGUCAUAAC	UAAAAGAGAGAAAAAGAGUGAGU	Translation	(-)
ath-miR156d-5p	AT5G53480	Chr5:21716752-21717881	4.5	-1	UGACAGAAGAGAGUGAGCAC	UUGUUUUUUCUUUUCUCUCA	Cleavage	(+)
ath-miR156e	AT5G53480	Chr5:21716752-21717881	4.5	-1	UGACAGAAGAGAGUGAGCAC	UUGUUUUUUCUUUUCUCUCA	Cleavage	(+)
ath-miR156f-5p	AT5G53480	Chr5:21716752-21717881	4.5	-1	UGACAGAAGAGAGUGAGCAC	UUGUUUUUUCUUUUCUCUCA	Cleavage	(+)
ath-miR156g	AT3G17210	Chr3:5882981-5883105	4.5	-1	CGACAGAAGAGAGUGAGCAC	UUGUUUGUUUCCUUCUGUUG	Translation	(+)
ath-miR156h	AT3G14310	Chr3:4771871-4772129	4.5	-1	UGACAGAAGAAAGAGAGCAC	UCUCUCUCUUUUUGUUGUCA	Cleavage	(-)
ath-miR156h	AT4G18610	Chr4:10251415-10251542	4.5	-1	UGACAGAAGAAAGAGAGCAC	AUUCUCUUUUUUUUCUCUCU	Cleavage	(+)
ath-miR156h	AT2G25650	Chr2:10916084-10916217	4.5	-1	UGACAGAAGAAAGAGAGCAC	AUGUUGUCUUUGUUCUGUUU	Cleavage	(+)
ath-miR156i	AT4G00830	Chr4:354967-355213	4.5	-1	UGACAGAAGAGAGAGAGCAG	AAGCUCUCUCUCAUGUGUUA	Cleavage	(+)
ath-miR156i	AT4G17800	Chr4:9895290-9895416	4.5	-1	UGACAGAAGAGAGAGAGCAG	AUCCUUUUUUUUUUCUGUGA	Cleavage	(-)
ath-miR156i	AT3G04590	Chr3:1238888-1239207	4.5	-1	UGACAGAAGAGAGAGAGCAG	AUACUCUUUUUCUUUUCUUA	Cleavage	(-)
ath-miR156j	AT4G00830	Chr4:354967-355213	4.5	-1	UGACAGAAGAGAGAGAGCAC	AAGCUCUCUCUCAUGUGUUA	Cleavage	(+)
ath-miR156j	AT4G17800	Chr4:9895290-9895416	4.5	-1	UGACAGAAGAGAGAGAGCAC	AUCCUUUUUUUUUUCUGUGA	Cleavage	(-)
ath-miR156j	AT3G04590	Chr3:1238888-1239207	4.5	-1	UGACAGAAGAGAGAGAGCAC	AUACUCUUUUUCUUUUCUUA	Cleavage	(-)
ath-miR157a-5p	AT5G51150	Chr5:20791574-20791776	4.5	-1	UUGACAGAAGAUAGAGAGCAC	CUGUUUUUUAUUUUCUUUCAC	Cleavage	(+)
ath-miR157b-5p	AT5G51150	Chr5:20791574-20791776	4.5	-1	UUGACAGAAGAUAGAGAGCAC	CUGUUUUUUAUUUUCUUUCAC	Cleavage	(+)
ath-miR157c-5p	AT5G51150	Chr5:20791574-20791776	4.5	-1	UUGACAGAAGAUAGAGAGCAC	CUGUUUUUUAUUUUCUUUCAC	Cleavage	(+)
ath-miR158a-5p	AT1G75680	Chr1:28417012-28417171	4.5	-1	CUUUGUCUACAAUUUUGGAAA	AAUCCAAAAUUGAGGAAAAAA	Cleavage	(-)
ath-miR158a-5p	AT5G06750	Chr5:2086223-2086322	4.5	-1	CUUUGUCUACAAUUUUGGAAA	GAUACAAAAUUGUAGGUUAAU	Cleavage	(-)
ath-miR158b	AT5G56530	Chr5:22891532-22891769	4.5	-1	CCCCAAAUGUAGACAAAGCA	UGUUUUGUUUUUUUUUGGGG	Translation	(+)
ath-miR163	AT5G02170	Chr5:430546-430696	4.5	-1	UUGAAGAGGACUUGGAACUUCGAU	UUCAUAGUUUUAAGUCCAUUUUAC	Cleavage	(+)
ath-miR164a	AT5G56530	Chr5:22891532-22891769	4.5	-1	UGGAGAAGCAGGGCACGUGCA	UACACUUACUCUGUUUUUUUA	Cleavage	(+)
ath-miR164b-5p	AT5G56530	Chr5:22891532-22891769	4.5	-1	UGGAGAAGCAGGGCACGUGCA	UACACUUACUCUGUUUUUUUA	Cleavage	(+)
ath-miR164c-5p	AT5G56530	Chr5:22891532-22891769	4.5	-1	UGGAGAAGCAGGGCACGUGCG	UACACUUACUCUGUUUUUUUA	Cleavage	(+)
ath-miR169d	AT5G16220	Chr5:5298312-5298445	4.5	-1	UGAGCCAAGGAUGACUUGCCG	AUUCAAGUGAUCCUUGUUUCA	Cleavage	(-)
ath-miR169e	AT5G16220	Chr5:5298312-5298445	4.5	-1	UGAGCCAAGGAUGACUUGCCG	AUUCAAGUGAUCCUUGUUUCA	Cleavage	(-)
ath-miR169f-5p	AT5G16220	Chr5:5298312-5298445	4.5	-1	UGAGCCAAGGAUGACUUGCCG	AUUCAAGUGAUCCUUGUUUCA	Cleavage	(-)
ath-miR169g-5p	AT5G16220	Chr5:5298312-5298445	4.5	-1	UGAGCCAAGGAUGACUUGCCG	AUUCAAGUGAUCCUUGUUUCA	Cleavage	(-)
ath-miR172a	AT5G48560	Chr5:19687058-19687148	4.5	-1	AGAAUCUUGAUGAUGCUGCAU	UAUUAGCAUUAUUAGGGUUCA	Cleavage	(+)
ath-miR172b-3p	AT5G48560	Chr5:19687058-19687148	4.5	-1	AGAAUCUUGAUGAUGCUGCAU	UAUUAGCAUUAUUAGGGUUCA	Cleavage	(+)
ath-miR172c	AT5G48560	Chr5:19687058-19687148	4.5	-1	AGAAUCUUGAUGAUGCUGCAG	UAUUAGCAUUAUUAGGGUUCA	Cleavage	(+)
ath-miR172d-3p	AT5G48560	Chr5:19687058-19687148	4.5	-1	AGAAUCUUGAUGAUGCUGCAG	UAUUAGCAUUAUUAGGGUUCA	Cleavage	(+)
ath-miR172d-5p	AT5G03290	Chr5:795992-796183	4.5	-1	GCAACAUCUUCAAGAUUCAGA	CAUGAGUUUUGAAGUUAUUGU	Cleavage	(+)
ath-miR172d-5p	AT3G60850	Chr3:22484143-22484216	4.5	-1	GCAACAUCUUCAAGAUUCAGA	UGUGUUUCUUGUAGGUGUUGU	Translation	(+)
ath-miR172e-3p	AT5G48560	Chr5:19687058-19687148	4.5	-1	GGAAUCUUGAUGAUGCUGCAU	UAUUAGCAUUAUUAGGGUUCA	Cleavage	(+)
ath-miR173-3p	AT3G63180	Chr3:23335995-23336143	4.5	-1	UGAUUCUCUGUGUAAGCGAAA	UGCCGUAUAUAUAGAGAAUCC	Cleavage	(-)
ath-miR173-5p	AT4G37180	Chr4:17506140-17506367	4.5	-1	UUCGCUUGCAGAGAGAAAUCAC	AGGGUUUGUUUUUGCAAGAGGA	Cleavage	(+)
ath-miR1886.2	AT5G28020	Chr5:10026203-10026344	4.5	-1	UGAGAUGAAAUCUUUGAUU	AGUCCAAGAUUUCAAUUUG	Cleavage	(-)
ath-miR1886.3	AT3G10190	Chr3:3156069-3156140	4.5	-1	AAUUAAAGAUUUCAUCUUACU	GAAAAGAUGAAAUUUUGAGUA	Cleavage	(+)
ath-miR1886.3	AT1G23310	Chr1:8268409-8268613	4.5	-1	AAUUAAAGAUUUCAUCUUACU	GGCAAUGUGAAAUUUGUAAUU	Cleavage	(-)
ath-miR1886.3	AT4G37650	Chr4:17693620-17693785	4.5	-1	AAUUAAAGAUUUCAUCUUACU	UUUGGAAUGAAAUUUGUGAUU	Cleavage	(+)
ath-miR1888a	AT5G60270	Chr5:24259792-24259928	4.5	-1	UAAGUUAAGAUUUGUGAAGAA	UUCUCCAUGAAGCUUAGCUUG	Translation	(+)
ath-miR2112-5p	AT3G16310	Chr3:5526323-5526417	4.5	-1	CGCAAAUGCGGAUAUCAAUGU	UCAUUGUUGUUUGUAUUUGAG	Cleavage	(-)
ath-miR2933a	AT2G16250	Chr2:7039390-7039491	4.5	-1	GAAAUCGGAGAGGAAAUUCGCC	AUUGGGUUUUGUUUUCGGUUUC	Cleavage	(-)
ath-miR2933b	AT2G16250	Chr2:7039390-7039491	4.5	-1	GAAAUCGGAGAGGAAAUUCGCC	AUUGGGUUUUGUUUUCGGUUUC	Cleavage	(-)
ath-miR2936	AT4G14400	Chr4:8298382-8298552	4.5	-1	CUUGAGAGAGAGAACACAGACG	UCUCUUUUUUUUUUCUUUCAAA	Cleavage	(+)
ath-miR2936	AT5G64050	Chr5:25629872-25629981	4.5	-1	CUUGAGAGAGAGAACACAGACG	UAACUGUACUUUCUCUCUAAGG	Cleavage	(-)
ath-miR3440b-5p	AT3G12930	Chr3:4129686-4129897	4.5	-1	UUUUCUUGGCCCAUCCACUUC	GGGGUUGAUGGGCCAACAAUA	Cleavage	(+)
ath-miR3440b-5p	AT3G27320	Chr3:10092522-10092768	4.5	-1	UUUUCUUGGCCCAUC-CACUUC	UUUGUGAGAUGGGCUAGGGAAA	Cleavage	(+)
ath-miR390a-3p	AT5G19280	Chr5:6493235-6493380	4.5	-1	CGCUAUCCAUCCUGAGUUUCA	AGAGAUUUAGGAUGGAUCGUC	Cleavage	(+)
ath-miR3933	AT5G02170	Chr5:430546-430696	4.5	-1	AGAAGCAAAAUGACGACUCGG	UGUAGUCUUCAUUUUUUUUUU	Cleavage	(+)
ath-miR3933	AT5G10930	Chr5:3445364-3445456	4.5	-1	AGAAGCAAAAUGACGACUCGG	AAGGAUUUUGAUUUUGCUUCU	Cleavage	(-)
ath-miR393a-5p	AT3G17940	Chr3:6143549-6143645	4.5	-1	UCCAAAGGGAUCGCAUUGAUCC	AUUUUAAUUUUAUCUCUUUGGG	Cleavage	(-)
ath-miR393b-5p	AT3G17940	Chr3:6143549-6143645	4.5	-1	UCCAAAGGGAUCGCAUUGAUCC	AUUUUAAUUUUAUCUCUUUGGG	Cleavage	(-)
ath-miR395a	AT5G40920	Chr5:16400671-16404239	4.5	-1	CUGAAGUGUUUGGGGGAACUC	AGGCUUCCUCUGACAUUUCAG	Translation	(+)
ath-miR395d	AT5G40920	Chr5:16400671-16404239	4.5	-1	CUGAAGUGUUUGGGGGAACUC	AGGCUUCCUCUGACAUUUCAG	Translation	(+)
ath-miR395e	AT5G40920	Chr5:16400671-16404239	4.5	-1	CUGAAGUGUUUGGGGGAACUC	AGGCUUCCUCUGACAUUUCAG	Translation	(+)
ath-miR396a-3p	AT5G40920	Chr5:16400671-16404239	4.5	-1	GUUCAAUAAAGCUGUGGGAAG	AUUGCUAGAGCUUUGUUUAAC	Cleavage	(+)
ath-miR399b	AT5G19820	Chr5:6695227-6695619	4.5	-1	UGCCAAAGGAGAGUUGCCCUG	UUUGGACACUCUUCUUUGGCC	Cleavage	(-)
ath-miR399c-3p	AT5G19820	Chr5:6695227-6695619	4.5	-1	UGCCAAAGGAGAGUUGCCCUG	UUUGGACACUCUUCUUUGGCC	Cleavage	(-)
ath-miR400	AT4G39920	Chr4:18517110-18517349	4.5	-1	UAUGAGAGUAUUAUAAGUCAC	AUUUUUUAUGAUACUCUUAUU	Cleavage	(+)
ath-miR400	AT5G40920	Chr5:16400671-16404239	4.5	-1	UAUGAGAGUAUUAUAAGUCAC	UUAAAUUAUAAUGCUUUUAUC	Cleavage	(+)
ath-miR400	AT1G72710	Chr1:27376255-27376654	4.5	-1	UAUGAGAGUAUUAUAAGUCAC	AAGACUUUUAACACUUUUAUU	Translation	(+)
ath-miR400	AT3G24503	Chr3:8919564-8919663	4.5	-1	UAUGAGAGUAUUAUAAGUCAC	AAUAAUAAUAAUAUUUUUAUA	Cleavage	(-)
ath-miR402	AT1G68530	Chr1:25712587-25712853	4.5	-1	UUCGAGGCCUAUUAAACCUCUG	UUUAGGUUUAUUUGGUCUCGGG	Translation	(-)
ath-miR403-5p	AT3G52180	Chr3:19349725-19349793	4.5	-1	UGUUUUGUGCUUGAAUCUAAUU	UACUAUGUUCAAGUAUAAUAUA	Cleavage	(-)
ath-miR407	AT4G14400	Chr4:8298382-8298552	4.5	-1	UUUAAAUCAUAUACUUUUGGU	GUGAAAAGUAUAUCAUUCGAA	Cleavage	(+)
ath-miR407	AT1G55535	Chr1:20731697-20731923	4.5	-1	UUUAAAUCAUAUACUUUUGGU	UUUGGGGAUAUAUGGUUUAGA	Cleavage	(-)
ath-miR407	AT2G31390	Chr2:13383424-13383527	4.5	-1	UUUAAAUCAUAUACUUUUGGU	UUCAAAUGUA-AUGAUUUAGA	Translation	(-)
ath-miR414	AT2G18162	Chr2:7898292-7898791	4.5	-1	UCAUCUUCAUCAUCAUCGUCA	UUACGAUGAU-AUGAAUAUGA	Translation	(-)
ath-miR416	AT1G18260	Chr1:6278857-6278939	4.5	-1	GGUUCGUACGUACACUGUUCA	GAAACAGUGUAUGUAGGGCCU	Cleavage	(-)
ath-miR417	AT1G23760	Chr1:8404189-8404310	4.5	-1	GAAGGUAGUGAAUUUGU-UCGA	ACGAUACAAACUUACUAUCUUC	Cleavage	(+)
ath-miR418	AT1G76090	Chr1:28550477-28550569	4.5	-1	UAAUGUGAUGAUGAACUGACC	AAUCUCUUUGUCGUCGUAUUA	Cleavage	(-)
ath-miR420	AT2G41180	Chr2:17165885-17166142	4.5	-1	UAAACUAAUCACGGAAAUGCA	AGUGAUUUUGUGAUCAGUUUA	Cleavage	(+)
ath-miR4221	AT3G23820	Chr3:8605111-8605563	4.5	-1	UUUUCCUCUGUUGAAUUCUUGC	UAUAGAAAUGAGGAGAGGAAAA	Translation	(+)
ath-miR4228-3p	AT5G64090	Chr5:25649650-25649725	4.5	-1	UCGGAUGCGAAACGGUGGUGU	UUAUUCUUGUUUUGCAUUUGA	Cleavage	(+)
ath-miR4239	AT4G37790	Chr4:17769308-17769607	4.5	-1	UUUGUUAUUUUCGCAUGCUCC	UUUGCUUGUAAAAAUAAUAAA	Cleavage	(+)
ath-miR4239	AT4G35310	Chr4:16804722-16804975	4.5	-1	UUUGUUAUUUUCGCAUGCUCC	CUUGUAUUUGAAAAAAACAAA	Cleavage	(+)
ath-miR4245	AT1G55160	Chr1:20579923-20580021	4.5	-1	ACAAAGUUUUAUACUGACAAU	UGUGUCAUUGUGAAACGUUGA	Cleavage	(+)
ath-miR426	AT2G41160	Chr2:17156043-17156172	4.5	-1	UUUUGGAAAUUUGUCCUUACG	UGUAAGUACAGAUUUGAAAAA	Cleavage	(-)
ath-miR447a.2-3p	AT3G25760	Chr3:9405128-9405244	4.5	-1	UAUGGAAGAAAUUGUAGUAUU	UAUAUAAUAAUCUUUUUCAUA	Translation	(+)
ath-miR447a.2-3p	AT1G64060	Chr1:23776409-23776932	4.5	-1	UAUGGAAGAAAUUGUAGUAUU	AAUUUUAAAAUUUCUUGUAUA	Cleavage	(+)
ath-miR447c-3p	AT3G46460	Chr3:17095901-17095971	4.5	-1	UUGGGGACGACAUCUUUUGUUG	UCGAAAAAAAUGUUGUUCUUGA	Cleavage	(-)
ath-miR472-3p	AT2G39870	Chr2:16645125-16645496	4.5	-1	UUUUUCCUACUCCGCCCAUACC	UUAAGGAGUGGAGUGGGGAAAU	Cleavage	(+)
ath-miR472-5p	AT1G18950	Chr1:6551651-6551971	4.5	-1	AUGGUCGAAGUAGGCAAAAUC	ACUUUUUUGUAUUUUGAUCAU	Cleavage	(+)
ath-miR5014a-3p	AT1G69160	Chr1:26001355-26001591	4.5	-1	UUGUACAAAUUUAAGUGUACG	UGUAAAAUAAAAUUUGUACAU	Cleavage	(+)
ath-miR5016	AT3G27750	Chr3:10285548-10285875	4.5	-1	UUCUUGUGGAUUCCUUGGAAA	AAUGCAAAGAGGCCAUAAGAA	Translation	(+)
ath-miR5018	AT2G36530	Chr2:15320760-15320842	4.5	-1	UUAAAGCUCCACCAUGAGUCCAAU	UGGUGACAUACGAUGGAGUUUUAA	Cleavage	(-)
ath-miR5019	AT5G54920	Chr5:22305643-22305780	4.5	-1	UGUUGGGAAAGAAAAACUCUU	GAUUUUUUUUCUUUCUCAAUG	Cleavage	(+)
ath-miR5019	AT1G30820	Chr1:10944910-10945143	4.5	-1	UGUUGGGAAAGAAAAACUCUU	GUUCGUUUUUUUUUUCCACCA	Cleavage	(-)
ath-miR5019	AT1G08460	Chr1:2674613-2674706	4.5	-1	UGUUGGGAAAGAAAAACUCUU	UUGAGUUUUUUUUUAACAACU	Cleavage	(+)
ath-miR5019	AT3G07525	Chr3:2399031-2399176	4.5	-1	UGUUGGGAAAGAAAAACUCUU	UUGAAUUCGUUUUUUCCAACA	Cleavage	(-)
ath-miR5020b	AT5G03370	Chr5:825483-825639	4.5	-1	AUGGCAUGAAAGAAGGUGAGA	GUUCUUCUUCUUUCUUGCCUU	Cleavage	(-)
ath-miR5020c	AT1G52060	Chr1:19358827-19358912	4.5	-1	UGGCAUGGAAGAAGGUGAGAC	UCCUCAUCUUCUUUAAUUUCA	Cleavage	(-)
ath-miR5021	AT4G14400	Chr4:8298382-8298552	4.5	-1	UGAGAAGAAGAAGAAGAAAA	UUUUCUUCUCUUUUUUUUUU	Translation	(+)
ath-miR5021	AT5G02170	Chr5:430546-430696	4.5	-1	UGAGAAGAAGAAGAAGAAAA	UUUUUUUUUUCAUUUGCUCA	Cleavage	(+)
ath-miR5021	AT1G23000	Chr1:8144941-8145169	4.5	-1	UGAGAAGAAGAAGAAGAAAA	UUUUCUUUCUCUUUUUUUUU	Cleavage	(+)
ath-miR5021	AT1G06350	Chr1:1935321-1935457	4.5	-1	UGAGAAGAAGAAGAAGAAAA	UGUUUUUCAUUUUCUUUUCG	Cleavage	(-)
ath-miR5021	AT1G73210	Chr1:27528051-27528321	4.5	-1	UGAGAAGAAGAAGAAGAAAA	UUUUGUUCUUUUUGUUUUUG	Cleavage	(-)
ath-miR5021	AT2G26010	Chr2:11087869-11087945	4.5	-1	UGAGAAGAAGAAGAAGAAAA	UUGUUGUUUUCUUUUUUUCG	Cleavage	(+)
ath-miR5021	AT3G55070	Chr3:20411116-20411221	4.5	-1	UGAGAAGAAGAAGAAGAAAA	UAUUCAUGUUUUUCUUCUUA	Cleavage	(+)
ath-miR5021	AT1G68490	Chr1:25695001-25695553	4.5	-1	UGAGAAGAAGAAGAAGAAAA	UUUUUUUAUUUUUUUUUUUG	Cleavage	(+)
ath-miR5021	AT5G57130	Chr5:23149411-23149633	4.5	-1	UGAGAAGAAGAAGAAGAAAA	AUUUCUUUUGUUUCUUUUUC	Translation	(+)
ath-miR5021	AT5G51550	Chr5:20939489-20939646	4.5	-1	UGAGAAGAAGAAGAAGAAAA	UAUCUUUCUUCUUCUUGUUA	Cleavage	(-)
ath-miR5021	AT2G28520	Chr2:12215760-12215893	4.5	-1	UGAGAAGAAGAAGAAGAAAA	GUUUCAGUUUUUUUUUUUUA	Cleavage	(+)
ath-miR5021	AT2G31200	Chr2:13295067-13295382	4.5	-1	UGAGAAGAAGAAGAAGAAAA	UUUGUGGUUUCUUUUUCUCA	Cleavage	(+)
ath-miR5022	AT3G17000	Chr3:5799554-5799684	4.5	-1	GUCAUGGGGUAUGAUCGAAUG	GAUUGGAUUAUAGCUUGUGAC	Cleavage	(+)
ath-miR5023	AT2G47470	Chr2:19483818-19484004	4.5	-1	AUUGGUAGUGGAUAAGGGGGC	AGGCUCGUAUUCAUUAUUAAU	Cleavage	(+)
ath-miR5024-5p	AT3G08960	Chr3:2729738-2729943	4.5	-1	AUGACAAGGCCAAGAUAUAACA	GAAUAAAUCUUGGCUUCGUGAU	Cleavage	(-)
ath-miR5025	AT5G46410	Chr5:18828179-18829313	4.5	-1	ACUGUAUAUAUGUAAGUGACA	AGUUUGUUACAAAUGUACAGU	Translation	(+)
ath-miR5028	AT5G44005	Chr5:17704967-17705106	4.5	-1	AAUUGGGUUUAUGCUAGAGUU	AACAUUUGUAUGAGCCUAAUU	Cleavage	(-)
ath-miR5628	AT3G22968	Chr3:8153909-8154095	4.5	-1	GAAAUAGCGAAGAUAUGAUUA	UAACCAUAUAUUCGCUUUUUU	Cleavage	(+)
ath-miR5628	AT4G22485	Chr4:11844233-11844379	4.5	-1	GAAAUAGCGAAGAUAUGAUUA	ACAUUGUGUCUUUAUUAUUUU	Cleavage	(-)
ath-miR5632-3p	AT4G12690	Chr4:7481773-7481851	4.5	-1	UUGGAUUUAUAGUUGGAUAAG	UUUGCCUGACUGUAAAUUCAC	Cleavage	(+)
ath-miR5632-3p	AT5G02090	Chr5:412040-412243	4.5	-1	UUGGAUUUAUAGUUGGAUAAG	AUUGUGUAAUUGUAAAACCAA	Cleavage	(-)
ath-miR5632-3p	AT1G44446	Chr1:16848304-16848548	4.5	-1	UUGGAUUUAUAGUUGGAUAAG	AACAUCCA-CUGUAAAUCCAA	Cleavage	(-)
ath-miR5632-3p	AT2G29590	Chr2:12654457-12654538	4.5	-1	UUGGAUUUAUAGUUGGAUAAG	UCUUUCUGGUUGUGAAUCUAA	Cleavage	(-)
ath-miR5633	AT5G38020	Chr5:15165646-15165889	4.5	-1	UAUGAUCAUCAGAAAACAGUG	AAAUGUAUUCUCAUGAUUGUA	Translation	(-)
ath-miR5634	AT3G01220	Chr3:75459-75539	4.5	-1	AGGGACUUUGUGAAUUUAGGG	AAUAAAAAUCAUAAAGUUCUU	Cleavage	(+)
ath-miR5635a	AT5G10280	Chr5:3234020-3234278	4.5	-1	UGUUAAGGAGUGUUAACGGUG	UGUUGUCAAUGUUCUUUAGCA	Cleavage	(+)
ath-miR5635b	AT5G10280	Chr5:3234020-3234278	4.5	-1	UGUUAAGGAGUGUUAACGGUG	UGUUGUCAAUGUUCUUUAGCA	Cleavage	(+)
ath-miR5635c	AT5G10280	Chr5:3234020-3234278	4.5	-1	UGUUAAGGAGUGUUAACGGUG	UGUUGUCAAUGUUCUUUAGCA	Cleavage	(+)
ath-miR5635d	AT5G10280	Chr5:3234020-3234278	4.5	-1	UGUUAAGGAGUGUUAACGGUG	UGUUGUCAAUGUUCUUUAGCA	Cleavage	(+)
ath-miR5638b	AT5G65560	Chr5:26200281-26200605	4.5	-1	ACAGUGGUCAUCUGGUGGGCU	AGACGCCCAGAUGAUUAUUGU	Cleavage	(-)
ath-miR5640	AT1G55210	Chr1:20597781-20597980	4.5	-1	UGAGAGAAGGAAUUAGAUUCA	AAUAUCUAGUUUUUUCUUUUU	Cleavage	(-)
ath-miR5640	AT1G01320	Chr1:121137-121521	4.5	-1	UGAGAGAAGGAAUUAGAUUCA	UGGACAUAAUUUUUUCUUUUA	Cleavage	(-)
ath-miR5640	AT1G78300	Chr1:29463253-29463386	4.5	-1	UGAGAGAAGGAAUUAGAUUCA	GAAACUUGCUUUCUUUUCUCA	Cleavage	(+)
ath-miR5640	AT3G20000	Chr3:6970437-6970633	4.5	-1	UGAGAGAAGGAAUUAGAUUCA	AAAAACGAAUUCUUUUUUUCU	Cleavage	(+)
ath-miR5641	AT1G74690	Chr1:28061177-28061325	4.5	-1	UGGAAGAAGAUGAUAGAAUUA	UUUUUGGAUCAUCUUCUUCUU	Cleavage	(-)
ath-miR5641	AT5G53480	Chr5:21716752-21717881	4.5	-1	UGGAAGAAGAUGAUAGAAUUA	UUUUUCUUUUGUUUUCUUUUA	Cleavage	(+)
ath-miR5641	AT1G13210	Chr1:4509011-4509166	4.5	-1	UGGAAGAAGAUGAUAGAAUUA	AUACUCU-UCAUCUUUUUUUA	Cleavage	(-)
ath-miR5643a	AT1G52310	Chr1:19480510-19480629	4.5	-1	AGGCUUUUAAGAUCUGGUUG	UAAUCGAAUCUUAGGAGACU	Cleavage	(+)
ath-miR5643b	AT1G52310	Chr1:19480510-19480629	4.5	-1	AGGCUUUUAAGAUCUGGUUG	UAAUCGAAUCUUAGGAGACU	Cleavage	(+)
ath-miR5645a	AT5G58375	Chr5:23596856-23597058	4.5	-1	AUUUGAGUCAUGUCGUUAAG	GUGGAGGAUAUGGCUUAGAU	Cleavage	(+)
ath-miR5645b	AT5G58375	Chr5:23596856-23597058	4.5	-1	AUUUGAGUCAUGUCGUUAAG	GUGGAGGAUAUGGCUUAGAU	Cleavage	(+)
ath-miR5645d	AT5G58375	Chr5:23596856-23597058	4.5	-1	AUUUGAGUCAUGUCGUUAAG	GUGGAGGAUAUGGCUUAGAU	Cleavage	(+)
ath-miR5645e	AT5G58375	Chr5:23596856-23597058	4.5	-1	AUUUGAGUCAUGUCGUUAAG	GUGGAGGAUAUGGCUUAGAU	Cleavage	(+)
ath-miR5645f	AT5G58375	Chr5:23596856-23597058	4.5	-1	AUUUGAGUCAUGUCGUUAAG	GUGGAGGAUAUGGCUUAGAU	Cleavage	(+)
ath-miR5648-5p	AT3G14650	Chr3:4924215-4924689	4.5	-1	UUUGGAAAUA-UUUGGCUUGACU	UGACAAACCAAAAUAUUUCCAAG	Translation	(+)
ath-miR5648-5p	AT2G37280	Chr2:15656437-15656530	4.5	-1	UUUGGAAAUAUUUGGCUUGACU	CUACUAUCAAAAUGUUUCCAAU	Cleavage	(+)
ath-miR5649a	AT2G32430	Chr2:13774303-13774552	4.5	-1	AUUGAAUAUGUUGGUUACUAU	AAAGUAACGAAUGUUUUUAAU	Cleavage	(+)
ath-miR5649b	AT2G32430	Chr2:13774303-13774552	4.5	-1	AUUGAAUAUGUUGGUUACUAU	AAAGUAACGAAUGUUUUUAAU	Cleavage	(+)
ath-miR5650	AT5G26710	Chr5:9308273-9308441	4.5	-1	UUGUUUUGGAUCUUAGAUACA	GCUCUUUAGGUUUUAAAACAA	Translation	(+)
ath-miR5652	AT1G44414	Chr1:16848173-16848288	4.5	-1	UUGAAUGUGAAUGAAUCGGGC	ACCCAAAUCAUUCAUAUACAG	Cleavage	(+)
ath-miR5654-3p	AT2G25830	Chr2:11018715-11018955	4.5	-1	UGGAAGAUGCUUUGGGAUUUAUU	UUAUAAUGCCGAAGGGUCUUUUA	Cleavage	(-)
ath-miR5655	AT3G17210	Chr3:5882981-5883105	4.5	-1	AAGUAGACACAUAAGAAGGAG	CUCUUUUUUGUUUGUUUGUUU	Translation	(+)
ath-miR5655	AT3G60030	Chr3:22165650-22165794	4.5	-1	AAGUAGACACAUAAGAAGGAG	UACGUUUUUGUGUGUUUGUUA	Cleavage	(-)
ath-miR5655	AT1G48170	Chr1:17789742-17790000	4.5	-1	AAGUAGACACAUAAGAAGGAG	GACUUUCAAAUGUGUUUGUUU	Cleavage	(+)
ath-miR5658	AT4G04630	Chr4:2332048-2332142	4.5	-1	AUGAUGAUGAUGAUGAUGAAA	GUUUAACAUUAUCAUCAUGAA	Cleavage	(-)
ath-miR5658	AT5G53480	Chr5:21716752-21717881	4.5	-1	AUGAUGAUGAUGAUGAUGAAA	UUUCAUUUGCAUCAUCAGCAU	Cleavage	(+)
ath-miR5658	AT4G39900	Chr4:18508318-18508505	4.5	-1	AUGAUGAUGAUGAUGAUGAAA	GCUUAGCAUCGUGAUUAUCGU	Cleavage	(-)
ath-miR5662	AT4G26110	Chr4:13235728-13235877	4.5	-1	AGAGGUGACCAUUGGAGAUG	GAUUUUCAAUGGUAACCAUU	Cleavage	(+)
ath-miR5662	AT1G67550	Chr1:25317193-25317359	4.5	-1	AGAGGUGACCAUUGGAGAUG	AAUCUGUGAUGGUUAUCUUC	Cleavage	(+)
ath-miR5663-3p	AT2G30720	Chr2:13089347-13089523	4.5	-1	UGAGAAUGCAAAUCCUUAGCU	CACUAAUAAUUUGUUUUUUCA	Cleavage	(-)
ath-miR5997	AT1G70810	Chr1:26705134-26705324	4.5	-1	UGAAACCAAGUAGCUAAAUAG	UAAUUGAAAUAUUUGGUUUUA	Cleavage	(+)
ath-miR5998a	AT1G60940	Chr1:22439141-22439318	4.5	-1	ACAGUUUGUGUUUUGUUUUGU	GUAGAAGAAAGAACAAACUGG	Translation	(-)
ath-miR5998a	AT3G12930	Chr3:4129686-4129897	4.5	-1	ACAGUUUGUGUUUUGUUUUGU	GUAGAGUUAGACCCAAACUGU	Cleavage	(+)
ath-miR5998a	AT4G00730	Chr4:299317-299661	4.5	-1	ACAGUUUGUGUUUUGUUUUGU	UAAAAAAAAAAAAAAAGCUGU	Translation	(-)
ath-miR5998a	AT1G19690	Chr1:6807718-6807841	4.5	-1	ACAGUUUGUGUUUUGUUUUGU	GUAAAAAGGGAUACAAAAUGU	Cleavage	(-)
ath-miR5998a	AT4G15393	Chr4:8807077-8807204	4.5	-1	ACAGUUUGUGUUUUGUUUUGU	AAAGAAAGAAAUAAAAAUUGU	Cleavage	(+)
ath-miR5998a	AT3G17940	Chr3:6143549-6143645	4.5	-1	ACAGUUUGUGUUUUGUUUUGU	GAAUAAUAAAAC-CAAACUGU	Cleavage	(-)
ath-miR5998b	AT1G60940	Chr1:22439141-22439318	4.5	-1	ACAGUUUGUGUUUUGUUUUGU	GUAGAAGAAAGAACAAACUGG	Translation	(-)
ath-miR5998b	AT3G12930	Chr3:4129686-4129897	4.5	-1	ACAGUUUGUGUUUUGUUUUGU	GUAGAGUUAGACCCAAACUGU	Cleavage	(+)
ath-miR5998b	AT4G00730	Chr4:299317-299661	4.5	-1	ACAGUUUGUGUUUUGUUUUGU	UAAAAAAAAAAAAAAAGCUGU	Translation	(-)
ath-miR5998b	AT1G19690	Chr1:6807718-6807841	4.5	-1	ACAGUUUGUGUUUUGUUUUGU	GUAAAAAGGGAUACAAAAUGU	Cleavage	(-)
ath-miR5998b	AT4G15393	Chr4:8807077-8807204	4.5	-1	ACAGUUUGUGUUUUGUUUUGU	AAAGAAAGAAAUAAAAAUUGU	Cleavage	(+)
ath-miR5998b	AT3G17940	Chr3:6143549-6143645	4.5	-1	ACAGUUUGUGUUUUGUUUUGU	GAAUAAUAAAAC-CAAACUGU	Cleavage	(-)
ath-miR774b-5p	AT5G65360	Chr5:26119827-26119955	4.5	-1	UGAGAUGAAGAUAUGGGUGAU	UCCCUCCACAUUUUCAUCUCC	Cleavage	(-)
ath-miR778	AT1G01320	Chr1:121137-121521	4.5	-1	UGGCUUGGUUUAUGUACACCG	AGGUGAGAAAAAGCCAAGCCA	Cleavage	(-)
ath-miR781a	AT1G71340	Chr1:26885176-26885479	4.5	-1	UUAGAGUUUUCUGGAUACUUA	AUCUGAUCCAGGAGACUCUGA	Cleavage	(-)
ath-miR781a	AT4G00830	Chr4:354967-355213	4.5	-1	UUAGAGUUUUCUGGAUACUUA	UUUGUUUUUGGAGAACUUUAA	Cleavage	(+)
ath-miR781b	AT1G71340	Chr1:26885176-26885479	4.5	-1	UUAGAGUUUUCUGGAUACUUA	AUCUGAUCCAGGAGACUCUGA	Cleavage	(-)
ath-miR781b	AT4G00830	Chr4:354967-355213	4.5	-1	UUAGAGUUUUCUGGAUACUUA	UUUGUUUUUGGAGAACUUUAA	Cleavage	(+)
ath-miR8121	AT5G40920	Chr5:16400671-16404239	4.5	-1	AAAGUAUAAUGGUUUAGUGGUUUG	UUGUUGAUUAAAUUAUAAUGCUUU	Cleavage	(+)
ath-miR8165	AT4G34980	Chr4:16656667-16656771	4.5	-1	AAUGGAGGCAAGUGUGAAGGA	UGUUUAAUACUUGUAUUCAUU	Cleavage	(-)
ath-miR8165	AT1G70670	Chr1:26646067-26646203	4.5	-1	AAUGGAGGCAAGUGUGAAGGA	AAUUACAUACUUGAUUCUAUU	Cleavage	(+)
ath-miR8166	AT2G32850	Chr2:13935196-13935299	4.5	-1	AGAGAGUGUAGAAAGUUUCUCA	UCUUAAACUUUACACAUUCUCU	Translation	(-)
ath-miR8170-3p	AT5G02770	Chr5:627089-627884	4.5	-1	UUGCUUAAAGAUUUUCUAUGU	AUGCAGCAAAUAUUUAAGUAA	Translation	(-)
ath-miR8171	AT1G78790	Chr1:29623543-29623726	4.5	-1	AUAGGUGGGCCAGUGGUAGGA	UCAUACUACUGGUUUGUUUAU	Cleavage	(-)
ath-miR8174	AT3G48810	Chr3:18099055-18099122	4.5	-1	AUGUGUAUAGGGAAGCUAAUC	CAUUUGCUUCUCUGUAUGAAU	Cleavage	(+)
ath-miR8174	AT5G25280	Chr5:8774794-8775566	4.5	-1	AUGUGUAUAGGGAAGCUAAUC	UUUUACUUUUUUUGUGCACGU	Cleavage	(+)
ath-miR8177	AT5G65490	Chr5:26177800-26177929	4.5	-1	GUGUGAUGAUGUGUCAUUUAUA	CUACUAUUACACAUCAUCAAAC	Cleavage	(-)
ath-miR8178	AT2G42975	Chr2:17874843-17875017	4.5	-1	UAACAGAGUAAUUGUACAGUG	UUGUGUACAGUUACUUUGUGU	Cleavage	(+)
ath-miR8178	AT1G51940	Chr1:19295902-19296030	4.5	-1	UAACAGAGUAAUUGUACAGUG	CUCUAUAUGAUUAUUCUUUUG	Cleavage	(-)
ath-miR8178	AT4G26960	Chr4:13538804-13538907	4.5	-1	UAACAGAGUAAUUGUACAGUG	UUCUGUA-GAUUACUUUGUAA	Cleavage	(-)
ath-miR8180	AT5G46410	Chr5:18828179-18829313	4.5	-1	UGCGGUGCGGGAGAAGUGC	GCACUCCUCUUGUACUGUU	Cleavage	(+)
ath-miR8182	AT2G03800	Chr2:1158787-1158945	4.5	-1	UUGUGUUGCGUUUCUGUUGAUU	AAACAGGAGAAAUGUAGAACAA	Cleavage	(+)
ath-miR8182	AT1G64060	Chr1:23776409-23776932	4.5	-1	UUGUGUUGCGUUUCUGUUGAUU	UUGUAGAGGAAGUGCAAUACAG	Cleavage	(+)
ath-miR8183	AT4G33540	Chr4:16133868-16133966	4.5	-1	UUUAGUUGACGGAAUUGUGG	GUGCAAGUAUGUCAGCUAAA	Cleavage	(+)
ath-miR823	AT3G26300	Chr3:9638972-9639145	4.5	-1	UGGGUGGUGAUCAUAUAAGAU	CUCUUGUAUGAUCAUGAUUUG	Cleavage	(-)
ath-miR824-5p	AT5G40920	Chr5:16400671-16404239	4.5	-1	UAGACCAUUUGUGAGAAGGGA	AACCACCUCACAGAUGUUUUA	Cleavage	(+)
ath-miR826b	AT5G09660	Chr5:2993376-2993489	4.5	-1	UGGUUUUGGACACGUGAAAAU	GUUUUCGAUUAUCCAAAACCA	Translation	(-)
ath-miR826b	AT3G52800	Chr3:19570510-19570692	4.5	-1	UGGUUUUGGACACGUGAAAAU	GCUUUUGCGUGUACAAAGUCU	Cleavage	(+)
ath-miR826b	AT1G08200	Chr1:2573954-2574175	4.5	-1	UGGUUUUGGACACGUGAAAAU	UCUUGUAUUUGUCCGAAACUA	Cleavage	(-)
ath-miR826b	AT5G40920	Chr5:16400671-16404239	4.5	-1	UGGUUUUGGACACGUGAAAAU	CAUUUGAUAUGUCCAAGAUCG	Cleavage	(+)
ath-miR829-5p	AT1G01320	Chr1:121137-121521	4.5	-1	ACUUUGAAGCUUUGAUUUGAA	CUUAAACUAAAUCUUCAAAGA	Translation	(-)
ath-miR829-5p	AT2G14720	Chr2:6300538-6300704	4.5	-1	ACUUUGAAGCUUUGAUUUGAA	AUAGAAUCAAAACAUCAAAGU	Translation	(-)
ath-miR833a-3p	AT3G21560	Chr3:7597381-7597569	4.5	-1	UAGACCGAUGUCAACAAACAAG	AUUUUUUUUUGGUAUGGGUCUA	Cleavage	(+)
ath-miR835-3p	AT2G31390	Chr2:13383424-13383527	4.5	-1	UGGAGAAGAUACGCAAGAAAG	UGUUUUUGUUUCUCUUCUUCA	Translation	(-)
ath-miR835-5p	AT2G20760	Chr2:8942757-8942973	4.5	-1	UUCUUGCAUAUGUUCUUUAUC	UAUGUAUAAUGUAUGUAGGAA	Cleavage	(-)
ath-miR835-5p	AT4G13300	Chr4:7742724-7742790	4.5	-1	UUCUUGCAUAUGUUCUUUAUC	UGUCAAAUACAUAUGUAAGAC	Cleavage	(-)
ath-miR837-3p	AT3G01380	Chr3:143977-144203	4.5	-1	AAACGAACAAAAAACUGAUGG	GUUUCAGUUUUUUUUUUUUUU	Cleavage	(-)
ath-miR837-3p	AT3G12930	Chr3:4129686-4129897	4.5	-1	AAACGAACAAAAAACUGAUGG	UGUAGAUUUUUUUGUUUGUUU	Cleavage	(+)
ath-miR838	AT1G03020	Chr1:697917-698093	4.5	-1	UUUUCUUCUACUUCUUGCACA	AGUACAAGAAUAAGAAGAAGA	Translation	(-)
ath-miR838	AT4G31560	Chr4:15296115-15296315	4.5	-1	UUUUCUUCUACUUCUUGCACA	UUUGGAAGAAAUAGAAGGACA	Translation	(+)
ath-miR838	AT3G27180	Chr3:10026953-10027052	4.5	-1	UUUUCUUCUACUUCUUGCACA	UCUUUAAGAAUGAGAAGAAAA	Translation	(-)
ath-miR838	AT3G22120	Chr3:7795046-7795180	4.5	-1	UUUUCUUCUACUUCUUGCACA	CUUUUAAGAAGAAGAAAAAAA	Translation	(-)
ath-miR838	AT2G32430	Chr2:13774303-13774552	4.5	-1	UUUUCUUCUACUUCUUGCACA	UUUCCGAUUAGUAGAAGGAAA	Cleavage	(+)
ath-miR840-3p	AT1G66180	Chr1:24648530-24648757	4.5	-1	UUGUUUAGGUCCCUUAGUUUC	UUUAUUAGGGGCUCUGAACAA	Translation	(+)
ath-miR846-3p	AT1G17455	Chr1:5998422-5998475	4.5	-1	UUGAAUUGAAGUGCUUGAAUU	AGUUUACACAUUUCGGUUUAA	Cleavage	(+)
ath-miR846-5p	AT4G35530	Chr4:16871782-16871840	4.5	-1	CAUUCAAGGACUUCUAUUCAG	AAGAAAAAAACUCUUUGAGUG	Translation	(-)
ath-miR847	AT1G51140	Chr1:18943485-18943709	4.5	-1	UCACUCCUCUUCUUCUUGAUG	AGAAAAGCAGAAGAGAAGUGA	Cleavage	(-)
ath-miR847	AT5G14880	Chr5:4817752-4817871	4.5	-1	UCACUCCUCUUCUUCUUGAUG	AUUCAAAGAGAAAAGGAUUGA	Cleavage	(+)
ath-miR848	AT1G54580	Chr1:20390950-20391015	4.5	-1	UGACAUGGGACUGCCUAAGCUA	AAACUUAUGUAGUCUCAUUUCC	Cleavage	(+)
ath-miR849	AT1G23000	Chr1:8144941-8145169	4.5	-1	UAACUAAACAUUGGUGUAGUA	UGAUAUAUUAGUGUUUGGUUU	Cleavage	(+)
ath-miR850	AT3G27520	Chr3:10193269-10193500	4.5	-1	UAAGAUCCGGACUACAACAAAG	GGGUGUUCUA-UCCGGAUUUUA	Cleavage	(+)
ath-miR850	AT5G46410	Chr5:18828179-18829313	4.5	-1	UAAGAUCCGGACUACAACAAAG	AGUUGUUG-AGUCUGAAUCUUG	Cleavage	(+)
ath-miR852	AT3G30180	Chr3:11813591-11813743	4.5	-1	AAGAUAAGCGCCUUAGUUCUG	UUGAGCUUAGUCUCUUAUCUU	Translation	(+)
ath-miR854a	AT1G78300	Chr1:29463253-29463386	4.5	-1	GAUGAGGAUAGGGAGGAGGAG	AACUUGCUUUCUUUUCUCAUC	Cleavage	(+)
ath-miR854b	AT1G78300	Chr1:29463253-29463386	4.5	-1	GAUGAGGAUAGGGAGGAGGAG	AACUUGCUUUCUUUUCUCAUC	Cleavage	(+)
ath-miR854c	AT1G78300	Chr1:29463253-29463386	4.5	-1	GAUGAGGAUAGGGAGGAGGAG	AACUUGCUUUCUUUUCUCAUC	Cleavage	(+)
ath-miR854d	AT1G78300	Chr1:29463253-29463386	4.5	-1	GAUGAGGAUAGGGAGGAGGAG	AACUUGCUUUCUUUUCUCAUC	Cleavage	(+)
ath-miR854e	AT1G78300	Chr1:29463253-29463386	4.5	-1	GAUGAGGAUAGGGAGGAGGAG	AACUUGCUUUCUUUUCUCAUC	Cleavage	(+)
ath-miR855	AT3G15680	Chr3:5316465-5316585	4.5	-1	AGCAAAAGCUAAGGAAAAGGAA	CUACUUUCUUUUUGUUUUUGUU	Translation	(+)
ath-miR857	AT3G18890	Chr3:6514983-6515085	4.5	-1	UUUUGUAUGUUGAAGGUGUAU	AUACAGUUUUAAUAUAAAAAG	Cleavage	(+)
ath-miR857	AT5G57130	Chr5:23149411-23149633	4.5	-1	UUUUGUAUGUUGAAGGUGUAU	UUUCUUUUUCAAUAUGUAAAA	Cleavage	(+)
ath-miR857	AT1G68590	Chr1:25757435-25757514	4.5	-1	UUUUGUAUGUUGAAGGUGUAU	AAUCACAUUCGACAUAAAAGA	Cleavage	(-)
ath-miR860	AT3G20000	Chr3:6970437-6970633	4.5	-1	UCAAUAGAUUGGACUAUGUAU	GUUCGUUGUCUGAUUUGUUGA	Cleavage	(+)
ath-miR863-3p	AT3G21280	Chr3:7478001-7478095	4.5	-1	UUGAGAGCAACAAGACAUAAU	AUUAUUUUUUGUUGUUGUCAU	Cleavage	(-)
ath-miR863-3p	AT5G40920	Chr5:16400671-16404239	4.5	-1	UUGAGAGCAACAAGACAUAAU	AUUUUGUCUUUCUGCUUUCAA	Translation	(+)
ath-miR863-3p	AT5G62130	Chr5:24950369-24950649	4.5	-1	UUGAGAGCAACAAGACAUAAU	GUUUUUUGUUUUUGCUCUCAA	Translation	(-)
ath-miR863-5p	AT4G05160	Chr4:2666691-2666744	4.5	-1	UUAUGUCUUGUUGAUCUCAAU	GUGGACACAAACAAGACAUAA	Cleavage	(+)
ath-miR865-5p	AT3G19970	Chr3:6961452-6961546	4.5	-1	AUGAAUUUGGAUCUAAUUGAG	GGUUUAUAGAUUCAAAUUCAU	Cleavage	(+)
ath-miR865-5p	AT4G23740	Chr4:12369231-12369334	4.5	-1	AUGAAUUUGGAUCUAAUUGAG	AUGAAAUAGAUUCAAAUUUCU	Cleavage	(+)
ath-miR866-3p	AT2G25480	Chr2:10845471-10845807	4.5	-1	ACAAAAUCCGUCUUUGAAGA	ACUUAAAAGGUGAAUUUUGG	Cleavage	(+)
ath-miR867	AT3G52590	Chr3:19506813-19507004	4.5	-1	UUGAACAUGGUUUAUUAGGAA	GUAGUGAUAAACUAUGUACAA	Cleavage	(+)
ath-miR868-3p	AT1G74790	Chr1:28101773-28101941	4.5	-1	CUUCUUAAGUGCUGAUAAUGC	AGAUUAU-AGUACUUAAGGGU	Cleavage	(+)
ath-miR869.1	AT2G15280	Chr2:6642212-6642343	4.5	-1	AUUGGUUCAAUUCUGGUGUUG	AGAUACUGGAAUUGAAAGAAU	Cleavage	(+)
ath-miR870-3p	AT5G41410	Chr5:16583812-16583945	4.5	-1	UAAUUUGGUGUUUCUUCGAUC	AGUUAGAUAAAAACCAAAUUA	Translation	(+)
ath-miR870-5p	AT5G39740	Chr5:15905351-15905529	4.5	-1	AAG-AACAUCAAAUUAGAAUGU	AAAUUCUAACUUGAUGUUACUU	Cleavage	(+)
ath-miR870-5p	AT5G19690	Chr5:6658303-6658408	4.5	-1	AAGAACAUCAAAUUAGAAUGU	UUAUUCGAAUUUCAUGUUUAU	Cleavage	(+)
ath-miR870-5p	AT2G39370	Chr2:16444027-16444131	4.5	-1	AAGAACAUCAAAUUAGAAUGU	UACUUGUGAUUUGAGGUUUUU	Cleavage	(-)
ath-miR156a-5p	AT5G35840	Chr5:14011675-14011768	5	-1	UGACAGAAGAGAGUGAGCAC	GUCUUCAUUUUUUUUUCUCA	Cleavage	(+)
ath-miR156a-5p	AT5G02170	Chr5:430546-430696	5	-1	UGACAGAAGAGAGUGAGCAC	GUCUUCAUUUUUUUUUUUCA	Cleavage	(+)
ath-miR156a-5p	AT3G17210	Chr3:5882981-5883105	5	-1	UGACAGAAGAGAGUGAGCAC	UUGUUUGUUUCCUUCUGUUG	Translation	(+)
ath-miR156a-5p	AT5G09460	Chr5:2943711-2944339	5	-1	UGACAGAAGAGAGUGAGCAC	GUCCCCACUCUCUCUUGUCU	Cleavage	(-)
ath-miR156a-5p	AT5G46410	Chr5:18828179-18829313	5	-1	UGACAGAAGAGAGUGAGCAC	UUGCUUGCUCCCUUUUUUUA	Translation	(+)
ath-miR156b-5p	AT5G35840	Chr5:14011675-14011768	5	-1	UGACAGAAGAGAGUGAGCAC	GUCUUCAUUUUUUUUUCUCA	Cleavage	(+)
ath-miR156b-5p	AT5G02170	Chr5:430546-430696	5	-1	UGACAGAAGAGAGUGAGCAC	GUCUUCAUUUUUUUUUUUCA	Cleavage	(+)
ath-miR156b-5p	AT3G17210	Chr3:5882981-5883105	5	-1	UGACAGAAGAGAGUGAGCAC	UUGUUUGUUUCCUUCUGUUG	Translation	(+)
ath-miR156b-5p	AT5G09460	Chr5:2943711-2944339	5	-1	UGACAGAAGAGAGUGAGCAC	GUCCCCACUCUCUCUUGUCU	Cleavage	(-)
ath-miR156b-5p	AT5G46410	Chr5:18828179-18829313	5	-1	UGACAGAAGAGAGUGAGCAC	UUGCUUGCUCCCUUUUUUUA	Translation	(+)
ath-miR156c-5p	AT5G35840	Chr5:14011675-14011768	5	-1	UGACAGAAGAGAGUGAGCAC	GUCUUCAUUUUUUUUUCUCA	Cleavage	(+)
ath-miR156c-5p	AT5G02170	Chr5:430546-430696	5	-1	UGACAGAAGAGAGUGAGCAC	GUCUUCAUUUUUUUUUUUCA	Cleavage	(+)
ath-miR156c-5p	AT3G17210	Chr3:5882981-5883105	5	-1	UGACAGAAGAGAGUGAGCAC	UUGUUUGUUUCCUUCUGUUG	Translation	(+)
ath-miR156c-5p	AT5G09460	Chr5:2943711-2944339	5	-1	UGACAGAAGAGAGUGAGCAC	GUCCCCACUCUCUCUUGUCU	Cleavage	(-)
ath-miR156c-5p	AT5G46410	Chr5:18828179-18829313	5	-1	UGACAGAAGAGAGUGAGCAC	UUGCUUGCUCCCUUUUUUUA	Translation	(+)
ath-miR156d-3p	AT1G48170	Chr1:17789742-17790000	5	-1	GCUCACUCUCUUUUUGUCAUAAC	CACAAAACAAAGAGAGAGUUGGU	Cleavage	(+)
ath-miR156d-3p	AT1G13730	Chr1:4712423-4712550	5	-1	GCUCACUCUCUUUUUGUCAUAAC	AUAGUGAGAGGGAGAGAGAGAGA	Cleavage	(+)
ath-miR156d-5p	AT5G35840	Chr5:14011675-14011768	5	-1	UGACAGAAGAGAGUGAGCAC	GUCUUCAUUUUUUUUUCUCA	Cleavage	(+)
ath-miR156d-5p	AT5G02170	Chr5:430546-430696	5	-1	UGACAGAAGAGAGUGAGCAC	GUCUUCAUUUUUUUUUUUCA	Cleavage	(+)
ath-miR156d-5p	AT3G17210	Chr3:5882981-5883105	5	-1	UGACAGAAGAGAGUGAGCAC	UUGUUUGUUUCCUUCUGUUG	Translation	(+)
ath-miR156d-5p	AT5G09460	Chr5:2943711-2944339	5	-1	UGACAGAAGAGAGUGAGCAC	GUCCCCACUCUCUCUUGUCU	Cleavage	(-)
ath-miR156d-5p	AT5G46410	Chr5:18828179-18829313	5	-1	UGACAGAAGAGAGUGAGCAC	UUGCUUGCUCCCUUUUUUUA	Translation	(+)
ath-miR156e	AT5G35840	Chr5:14011675-14011768	5	-1	UGACAGAAGAGAGUGAGCAC	GUCUUCAUUUUUUUUUCUCA	Cleavage	(+)
ath-miR156e	AT5G02170	Chr5:430546-430696	5	-1	UGACAGAAGAGAGUGAGCAC	GUCUUCAUUUUUUUUUUUCA	Cleavage	(+)
ath-miR156e	AT3G17210	Chr3:5882981-5883105	5	-1	UGACAGAAGAGAGUGAGCAC	UUGUUUGUUUCCUUCUGUUG	Translation	(+)
ath-miR156e	AT5G09460	Chr5:2943711-2944339	5	-1	UGACAGAAGAGAGUGAGCAC	GUCCCCACUCUCUCUUGUCU	Cleavage	(-)
ath-miR156e	AT5G46410	Chr5:18828179-18829313	5	-1	UGACAGAAGAGAGUGAGCAC	UUGCUUGCUCCCUUUUUUUA	Translation	(+)
ath-miR156f-3p	AT2G43970	Chr2:18205274-18205488	5	-1	GCUCACUCUCUAUCCGUCACC	GGAGAUAAAUAGAGAGAGAGC	Cleavage	(-)
ath-miR156f-5p	AT5G35840	Chr5:14011675-14011768	5	-1	UGACAGAAGAGAGUGAGCAC	GUCUUCAUUUUUUUUUCUCA	Cleavage	(+)
ath-miR156f-5p	AT5G02170	Chr5:430546-430696	5	-1	UGACAGAAGAGAGUGAGCAC	GUCUUCAUUUUUUUUUUUCA	Cleavage	(+)
ath-miR156f-5p	AT3G17210	Chr3:5882981-5883105	5	-1	UGACAGAAGAGAGUGAGCAC	UUGUUUGUUUCCUUCUGUUG	Translation	(+)
ath-miR156f-5p	AT5G09460	Chr5:2943711-2944339	5	-1	UGACAGAAGAGAGUGAGCAC	GUCCCCACUCUCUCUUGUCU	Cleavage	(-)
ath-miR156f-5p	AT5G46410	Chr5:18828179-18829313	5	-1	UGACAGAAGAGAGUGAGCAC	UUGCUUGCUCCCUUUUUUUA	Translation	(+)
ath-miR156g	AT1G60940	Chr1:22439141-22439318	5	-1	CGACAGAAGAGAGUGAGCAC	GUUCUUAUUUUCUUUUCUUG	Cleavage	(-)
ath-miR156g	AT5G09460	Chr5:2943711-2944339	5	-1	CGACAGAAGAGAGUGAGCAC	GUCCCCACUCUCUCUUGUCU	Cleavage	(-)
ath-miR156g	AT3G55420	Chr3:20548610-20548783	5	-1	CGACAGAAGAGAGUGAGCAC	UUACUC-CUUUUUUUUGUUG	Cleavage	(+)
ath-miR156h	AT3G29030	Chr3:11011343-11011512	5	-1	UGACAGAAGAAAGAGAGCAC	GUGCUUUUUUUUUUUUUUUC	Cleavage	(-)
ath-miR156h	AT2G26010	Chr2:11087869-11087945	5	-1	UGACAGAAGAAAGAGAGCAC	UUGUUUUCUUUUUUUCGUUU	Cleavage	(+)
ath-miR156h	AT1G53380	Chr1:19913116-19913255	5	-1	UGACAGAAGAAAGAGAGCAC	UGUUUUUUUUUUUUCUGUCU	Cleavage	(-)
ath-miR156h	AT1G47240	Chr1:17308829-17308969	5	-1	UGACAGAAGAAAGAGAGCAC	GUACUUUUUUGUUUUUGUUA	Translation	(-)
ath-miR156h	AT4G14400	Chr4:8298382-8298552	5	-1	UGACAGAAGAAAGAGAGCAC	UCUCUUUUUUUUUUCUUUCA	Cleavage	(+)
ath-miR156h	AT5G46790	Chr5:18983905-18984057	5	-1	UGACAGAAGAAAGAGAGCAC	ACGUUUUUUUUCUUCUCUUG	Cleavage	(-)
ath-miR156h	AT3G07990	Chr3:2554722-2554924	5	-1	UGACAGAAGAAAGAGAGCAC	CUUCUUUCUUUUUUUUGUGU	Cleavage	(+)
ath-miR156h	AT5G51150	Chr5:20791574-20791776	5	-1	UGACAGAAGAAAGAGAGCAC	CUGUUUUUUAUUUUCUUUCA	Translation	(+)
ath-miR156h	AT3G24503	Chr3:8919564-8919663	5	-1	UGACAGAAGAAAGAGAGCAC	AUACUUUUUUGUUUUUGUUA	Translation	(-)
ath-miR156h	AT5G09380	Chr5:2911183-2911290	5	-1	UGACAGAAGAAAGAGAGCAC	UUUCUUUUUUUUUUUUGGUA	Cleavage	(-)
ath-miR156h	AT3G17210	Chr3:5882981-5883105	5	-1	UGACAGAAGAAAGAGAGCAC	UUGUUUGUUUCCUUCUGUUG	Translation	(+)
ath-miR156h	AT1G63690	Chr1:23622269-23622394	5	-1	UGACAGAAGAAAGAGAGCAC	AUGGUUUGUUUCUUUUGUAA	Cleavage	(+)
ath-miR156h	AT2G45670	Chr2:18814723-18814977	5	-1	UGACAGAAGAAAGAGAGCAC	CUGUAUUUGUUUUUUUGUCA	Cleavage	(-)
ath-miR156h	AT5G53480	Chr5:21716752-21717881	5	-1	UGACAGAAGAAAGAGAGCAC	UUGUUUUUUCUUUUCUCUCA	Translation	(+)
ath-miR156h	AT5G61560	Chr5:24756537-24756711	5	-1	UGACAGAAGAAAGAGAGCAC	UUGUGGUUUUUGUUUUGUCA	Cleavage	(+)
ath-miR156h	AT5G58760	Chr5:23730503-23730636	5	-1	UGACAGAAGAAAGAGAGCAC	UUGCU-UCUUUUUUCUUUUG	Cleavage	(-)
ath-miR156h	AT3G55420	Chr3:20548610-20548783	5	-1	UGACAGAAGAAAGAGAGCAC	UUACUC-CUUUUUUUUGUUG	Cleavage	(+)
ath-miR156i	AT3G17210	Chr3:5882981-5883105	5	-1	UGACAGAAGAGAGAGAGCAG	AAUUUCUCUCUUUUUUGUUU	Cleavage	(+)
ath-miR156i	AT5G51150	Chr5:20791574-20791776	5	-1	UGACAGAAGAGAGAGAGCAG	CUGUUUUUUAUUUUCUUUCA	Translation	(+)
ath-miR156i	AT4G31450	Chr4:15255712-15255851	5	-1	UGACAGAAGAGAGAGAGCAG	UCUCUCUCUCCCUUUUGUCU	Translation	(-)
ath-miR156i	AT3G14620	Chr3:4916883-4916971	5	-1	UGACAGAAGAGAGAGAGCAG	UUCCUCUGUCUUUUUUGUUU	Cleavage	(+)
ath-miR156i	AT4G18610	Chr4:10251415-10251542	5	-1	UGACAGAAGAGAGAGAGCAG	AUUCUCUUUUUUUUCUCUCU	Cleavage	(+)
ath-miR156i	AT2G25650	Chr2:10916084-10916217	5	-1	UGACAGAAGAGAGAGAGCAG	AUGUUGUCUUUGUUCUGUUU	Cleavage	(+)
ath-miR156i	AT5G40920	Chr5:16400671-16404239	5	-1	UGACAGAAGAGAGAGAGCAG	UUGUGAUCUCUGUUUUGUUA	Cleavage	(+)
ath-miR156i	AT1G23000	Chr1:8144941-8145169	5	-1	UGACAGAAGAGAGAGAGCAG	UUUCUUUCUCUUUUUUUUUG	Cleavage	(+)
ath-miR156i	AT5G62130	Chr5:24950369-24950649	5	-1	UGACAGAAGAGAGAGAGCAG	UUCCUCUCUCUCUGUUUUUA	Cleavage	(-)
ath-miR156j	AT3G17210	Chr3:5882981-5883105	5	-1	UGACAGAAGAGAGAGAGCAC	AAUUUCUCUCUUUUUUGUUU	Cleavage	(+)
ath-miR156j	AT4G31450	Chr4:15255712-15255851	5	-1	UGACAGAAGAGAGAGAGCAC	UCUCUCUCUCCCUUUUGUCU	Translation	(-)
ath-miR156j	AT3G14620	Chr3:4916883-4916971	5	-1	UGACAGAAGAGAGAGAGCAC	UUCCUCUGUCUUUUUUGUUU	Cleavage	(+)
ath-miR156j	AT3G14310	Chr3:4771871-4772129	5	-1	UGACAGAAGAGAGAGAGCAC	UCUCUCUCUUUUUGUUGUCA	Cleavage	(-)
ath-miR156j	AT5G51150	Chr5:20791574-20791776	5	-1	UGACAGAAGAGAGAGAGCAC	CUGUUUUUUAUUUUCUUUCA	Translation	(+)
ath-miR156j	AT4G18610	Chr4:10251415-10251542	5	-1	UGACAGAAGAGAGAGAGCAC	AUUCUCUUUUUUUUCUCUCU	Cleavage	(+)
ath-miR156j	AT2G25650	Chr2:10916084-10916217	5	-1	UGACAGAAGAGAGAGAGCAC	AUGUUGUCUUUGUUCUGUUU	Cleavage	(+)
ath-miR156j	AT5G40920	Chr5:16400671-16404239	5	-1	UGACAGAAGAGAGAGAGCAC	UUGUGAUCUCUGUUUUGUUA	Cleavage	(+)
ath-miR156j	AT3G27320	Chr3:10092522-10092768	5	-1	UGACAGAAGAGAGAGAGCAC	GUGUU-UCUCUUUUCUGGUA	Cleavage	(+)
ath-miR156j	AT1G23000	Chr1:8144941-8145169	5	-1	UGACAGAAGAGAGAGAGCAC	UUUCUUUCUCUUUUUUUUUG	Cleavage	(+)
ath-miR156j	AT5G62130	Chr5:24950369-24950649	5	-1	UGACAGAAGAGAGAGAGCAC	UUCCUCUCUCUCUGUUUUUA	Cleavage	(-)
ath-miR157a-5p	AT5G14105	Chr5:4551976-4552047	5	-1	UUGACAGAAGAUAGAGAGCAC	AUAAUCUCUAUCUUCUUUCGC	Cleavage	(-)
ath-miR157a-5p	AT3G24503	Chr3:8919564-8919663	5	-1	UUGACAGAAGAUAGAGAGCAC	CCACUUUUUAUUUUUUGUUCA	Cleavage	(-)
ath-miR157a-5p	AT1G25400	Chr1:8911220-8911343	5	-1	UUGACAGAAGAUAGAGAGCAC	AGGUUUUCAAUUUUUUGGCAA	Cleavage	(-)
ath-miR157a-5p	AT3G07990	Chr3:2554722-2554924	5	-1	UUGACAGAAGAUAGAGAGCAC	AGUUUCUCUAUCUUUUCUCCA	Cleavage	(+)
ath-miR157a-5p	AT3G14310	Chr3:4771871-4772129	5	-1	UUGACAGAAGAUAGAGAGCAC	UCUCUCUCUUUUUGUUGUCAA	Cleavage	(-)
ath-miR157a-5p	AT5G47480	Chr5:19263150-19263399	5	-1	UUGACAGAAGAUAGAGAGCAC	ACUUUCUCUG-CUUCUGUCAA	Translation	(+)
ath-miR157b-5p	AT5G14105	Chr5:4551976-4552047	5	-1	UUGACAGAAGAUAGAGAGCAC	AUAAUCUCUAUCUUCUUUCGC	Cleavage	(-)
ath-miR157b-5p	AT3G24503	Chr3:8919564-8919663	5	-1	UUGACAGAAGAUAGAGAGCAC	CCACUUUUUAUUUUUUGUUCA	Cleavage	(-)
ath-miR157b-5p	AT1G25400	Chr1:8911220-8911343	5	-1	UUGACAGAAGAUAGAGAGCAC	AGGUUUUCAAUUUUUUGGCAA	Cleavage	(-)
ath-miR157b-5p	AT3G07990	Chr3:2554722-2554924	5	-1	UUGACAGAAGAUAGAGAGCAC	AGUUUCUCUAUCUUUUCUCCA	Cleavage	(+)
ath-miR157b-5p	AT3G14310	Chr3:4771871-4772129	5	-1	UUGACAGAAGAUAGAGAGCAC	UCUCUCUCUUUUUGUUGUCAA	Cleavage	(-)
ath-miR157b-5p	AT5G47480	Chr5:19263150-19263399	5	-1	UUGACAGAAGAUAGAGAGCAC	ACUUUCUCUG-CUUCUGUCAA	Translation	(+)
ath-miR157c-3p	AT3G54000	Chr3:19998292-19998624	5	-1	GCUCUCUAUACUUCUGUCACC	AAAGUUGGAAGUGUGGAGAGG	Cleavage	(+)
ath-miR157c-5p	AT5G14105	Chr5:4551976-4552047	5	-1	UUGACAGAAGAUAGAGAGCAC	AUAAUCUCUAUCUUCUUUCGC	Cleavage	(-)
ath-miR157c-5p	AT3G24503	Chr3:8919564-8919663	5	-1	UUGACAGAAGAUAGAGAGCAC	CCACUUUUUAUUUUUUGUUCA	Cleavage	(-)
ath-miR157c-5p	AT1G25400	Chr1:8911220-8911343	5	-1	UUGACAGAAGAUAGAGAGCAC	AGGUUUUCAAUUUUUUGGCAA	Cleavage	(-)
ath-miR157c-5p	AT3G07990	Chr3:2554722-2554924	5	-1	UUGACAGAAGAUAGAGAGCAC	AGUUUCUCUAUCUUUUCUCCA	Cleavage	(+)
ath-miR157c-5p	AT3G14310	Chr3:4771871-4772129	5	-1	UUGACAGAAGAUAGAGAGCAC	UCUCUCUCUUUUUGUUGUCAA	Cleavage	(-)
ath-miR157c-5p	AT5G47480	Chr5:19263150-19263399	5	-1	UUGACAGAAGAUAGAGAGCAC	ACUUUCUCUG-CUUCUGUCAA	Translation	(+)
ath-miR157d	AT5G14105	Chr5:4551976-4552047	5	-1	UGACAGAAGAUAGAGAGCAC	AUAAUCUCUAUCUUCUUUCG	Cleavage	(-)
ath-miR157d	AT5G53480	Chr5:21716752-21717881	5	-1	UGACAGAAGAUAGAGAGCAC	UUGUUUUUUCUUUUCUCUCA	Translation	(+)
ath-miR158a-3p	AT5G56530	Chr5:22891532-22891769	5	-1	UCCCAAAUGUAGACAAAGCA	UGUUUUGUUUUUUUUUGGGG	Translation	(+)
ath-miR158a-3p	AT5G19820	Chr5:6695227-6695619	5	-1	UCCCAAAUGUAGACAAAGCA	GUUUUUGUAUGCAAUUGGGA	Cleavage	(-)
ath-miR159a	AT2G25830	Chr2:11018715-11018955	5	-1	UUUGGAUUGAAGGGAGCUCUA	CGAAGGGUCUUUUAAUCUAAA	Cleavage	(-)
ath-miR159c	AT2G25830	Chr2:11018715-11018955	5	-1	UUUGGAUUGAAGGGAGCUCCU	CGAAGGGUCUUUUAAUCUAAA	Cleavage	(-)
ath-miR161.1	AT2G18750	Chr2:8128368-8128620	5	-1	UGAAAGUGACUACAUCGGGGU	AACCUGAUGUAGUUUCUAUUG	Cleavage	(+)
ath-miR161.1	AT5G64880	Chr5:25933889-25934108	5	-1	UGAAAGUGACUACAUCGGGGU	UCUUAAAUGUGGUUAUUUUCG	Cleavage	(+)
ath-miR164a	AT1G78995	Chr1:29715081-29715301	5	-1	UGGAGAAGCAGGGCACGUGCA	UGACUGUGUCUUGUUUCUUCG	Cleavage	(-)
ath-miR164a	AT5G43790	Chr5:17592006-17592082	5	-1	UGGAGAAGCAGGGCACGUGCA	ACAACUUGUUUUGUUUUUCUA	Cleavage	(-)
ath-miR164a	AT5G25070	Chr5:8640878-8641151	5	-1	UGGAGAAGCAGGGCACGUGCA	UAUACUUUCUUUGUUUCUCUG	Cleavage	(-)
ath-miR164b-5p	AT1G78995	Chr1:29715081-29715301	5	-1	UGGAGAAGCAGGGCACGUGCA	UGACUGUGUCUUGUUUCUUCG	Cleavage	(-)
ath-miR164b-5p	AT5G43790	Chr5:17592006-17592082	5	-1	UGGAGAAGCAGGGCACGUGCA	ACAACUUGUUUUGUUUUUCUA	Cleavage	(-)
ath-miR164b-5p	AT5G25070	Chr5:8640878-8641151	5	-1	UGGAGAAGCAGGGCACGUGCA	UAUACUUUCUUUGUUUCUCUG	Cleavage	(-)
ath-miR164c-5p	AT1G78995	Chr1:29715081-29715301	5	-1	UGGAGAAGCAGGGCACGUGCG	UGACUGUGUCUUGUUUCUUCG	Cleavage	(-)
ath-miR164c-5p	AT5G43790	Chr5:17592006-17592082	5	-1	UGGAGAAGCAGGGCACGUGCG	ACAACUUGUUUUGUUUUUCUA	Cleavage	(-)
ath-miR164c-5p	AT5G25070	Chr5:8640878-8641151	5	-1	UGGAGAAGCAGGGCACGUGCG	UAUACUUUCUUUGUUUCUCUG	Cleavage	(-)
ath-miR167a-3p	AT5G40920	Chr5:16400671-16404239	5	-1	GAUCAUGUUCGCAGUUUCACC	UGUGAUGAUGUGAAGAUGAUU	Cleavage	(+)
ath-miR167a-5p	AT5G20610	Chr5:6972905-6972996	5	-1	UGAAGCUGCCAGCAUGAUC	UAUUGUGUUUGCAGUUUUA	Translation	(+)
ath-miR167b	AT5G20610	Chr5:6972905-6972996	5	-1	UGAAGCUGCCAGCAUGAUC	UAUUGUGUUUGCAGUUUUA	Translation	(+)
ath-miR167d	AT5G20610	Chr5:6972905-6972996	5	-1	UGAAGCUGCCAGCAUGAUC	UAUUGUGUUUGCAGUUUUA	Translation	(+)
ath-miR170-5p	AT1G74790	Chr1:28101773-28101941	5	-1	UAUUGGCCUGGUUCACUCAGA	UAUGAGU-AAUUAGGCCAGAA	Cleavage	(+)
ath-miR171a-5p	AT1G74790	Chr1:28101773-28101941	5	-1	UAUUGGCCUGGUUCACUCAGA	UAUGAGU-AAUUAGGCCAGAA	Cleavage	(+)
ath-miR171b-3p	AT3G19990	Chr3:6967119-6967249	5	-1	UUGAGCCGUGCCAAUAUCACG	CUUGACAUUGGUAUGUCUGAA	Cleavage	(+)
ath-miR171c-3p	AT3G19990	Chr3:6967119-6967249	5	-1	UUGAGCCGUGCCAAUAUCACG	CUUGACAUUGGUAUGUCUGAA	Cleavage	(+)
ath-miR172d-5p	AT3G61750	Chr3:22857609-22857810	5	-1	GCAAC-AUCUUCAAGAUUCAGA	GUUGAGUUUUGAAGGUUGUUGU	Cleavage	(-)
ath-miR172d-5p	AT1G01240	Chr1:101803-101947	5	-1	GCAACAUCUUCAAGAUUCAGA	UCAGAAGCUUGAGAAUGUUGG	Cleavage	(+)
ath-miR172d-5p	AT1G23490	Chr1:8338581-8338778	5	-1	GCAACAUCUUCAAGAUUCAGA	CACGAAACUUGAUGAUUUUGC	Cleavage	(+)
ath-miR172d-5p	AT5G35490	Chr5:13690287-13690552	5	-1	GCAACAUCUUCAAGAUUCAGA	AAUUAUUCUUGAAGCUAUUGC	Cleavage	(+)
ath-miR173-3p	AT3G07440	Chr3:2383126-2383215	5	-1	UGAUUCUCUGUGUAAGCGAAA	AUUAGUUUAUAUAGAGAGGCG	Cleavage	(+)
ath-miR173-3p	AT3G25760	Chr3:9405128-9405244	5	-1	UGAUUCUCUGUGUAAGCGAAA	AAUCUUUUUCAUAGAGAAUUU	Cleavage	(+)
ath-miR173-5p	AT1G20090	Chr1:6968628-6968934	5	-1	UUCGCUUGCAGAGAGAAAUCAC	UCUUUUACUCUUUGCUGGUGAA	Cleavage	(+)
ath-miR1886.1	AT3G08600	Chr3:2613692-2613875	5	-1	UGAGAGAAGUGAGAUGAAAUC	ACAUUCAUCUUGUUUCUCUGC	Cleavage	(+)
ath-miR1886.1	AT1G20670	Chr1:7164132-7164386	5	-1	UGAGAGAAGUGAGAUGAAAUC	AUUUUUUUCUCAUUUUUCUAG	Cleavage	(-)
ath-miR1886.1	AT1G76090	Chr1:28550477-28550569	5	-1	UGAGAGAAGUGAGAUGAAAUC	UUUUUCUUCUUCUUUCUUUCU	Translation	(-)
ath-miR1886.1	AT5G40920	Chr5:16400671-16404239	5	-1	UGAGAGAAGUGAGAUGAAAUC	UAUUUUGUCUUUCUGCUUUCA	Translation	(+)
ath-miR1886.1	AT1G67030	Chr1:25017316-25017452	5	-1	UGAGAGAAGUGAGAUGAAAUC	CGUUUGCUUUCACUUUUUUUU	Cleavage	(+)
ath-miR1886.1	AT3G23820	Chr3:8605111-8605563	5	-1	UGAGAGAAGUGAGAUGAAAUC	CUUUUUAUCUUAUCUUUUUCU	Cleavage	(+)
ath-miR1886.1	AT3G14310	Chr3:4771871-4772129	5	-1	UGAGAGAAGUGAGAUGAAAUC	AUUUUCUUGUAACUUCUCUCU	Translation	(-)
ath-miR1886.1	AT3G09970	Chr3:3065407-3065576	5	-1	UGAGAGAAGUGAGAUGAAAU	AAUUGAAUUUACUUUUCUUA	Cleavage	(+)
ath-miR1886.1	AT2G37640	Chr2:15787707-15788059	5	-1	UGAGAGAAGUGAGAUGAAAUC	UUUUUAAUUUUAUUUUUUACA	Cleavage	(-)
ath-miR1886.1	AT5G53480	Chr5:21716752-21717881	5	-1	UGAGAGAAGUGAGAUGAAAUC	CUUGUUUUUUCUUUUCUCUCA	Translation	(+)
ath-miR1886.1	AT1G78870	Chr1:29652312-29652595	5	-1	UGAGAGAAGUGAGAUGAAAUC	UGUUGGAAUUUACUUCUUUUA	Cleavage	(+)
ath-miR1886.2	AT3G54920	Chr3:20348530-20348663	5	-1	UGAGAUGAAAUCUUUGAUUGG	CCAAUCAAAUGCUUUGUUUCA	Translation	(+)
ath-miR1886.2	AT1G55210	Chr1:20597781-20597980	5	-1	UGAGAUGAAAUCUUUGAUUGG	UUGAUAAUAUAUUUCAUUUUA	Cleavage	(-)
ath-miR1886.2	AT1G14020	Chr1:4805211-4805346	5	-1	UGAGAUGAAAUCUUUGAUUGG	UAAAAAGAAGAUUAUGUCUCA	Cleavage	(+)
ath-miR1886.3	AT1G72710	Chr1:27376255-27376654	5	-1	AAUUAAAGAUUUCAUCUUACU	AGUGAAAUGAGAGCUAUAAUU	Cleavage	(+)
ath-miR1886.3	AT5G19820	Chr5:6695227-6695619	5	-1	AAUUAAAGAUUUCAUCUUACU	GGAAGGAUGAAAUUGUUAGUG	Cleavage	(-)
ath-miR1886.3	AT4G08590	Chr4:5463888-5463948	5	-1	AAUUAAAGAUUUCAUCUUACU	GGUGCAAUGAAGUUUUUAAGU	Cleavage	(-)
ath-miR1886.3	AT5G42310	Chr5:16918305-16918531	5	-1	AAUUAAAGAUUUCAUCUUACU	CACAAGAGGAAGUCUUUCAUA	Cleavage	(+)
ath-miR1886.3	AT1G72750	Chr1:27384206-27384382	5	-1	AAUUAAAGAUUUCAUCUUACU	AUAAAAAUGAAAACUUUAUUU	Cleavage	(+)
ath-miR1887	AT2G18328	Chr2:7964787-7964875	5	-1	UACUAAGUAGAGUCUAAGAGA	UUUCUUAUAUUCUAUUUGCUU	Cleavage	(+)
ath-miR1887	AT5G09850	Chr5:3063175-3063463	5	-1	UACUAAGUAGAGUCUAAGAGA	UUUCUUGGAUUUUAUUAAAUA	Cleavage	(-)
ath-miR1887	AT2G25480	Chr2:10845471-10845807	5	-1	UACUAAGUAGAGUCUAAGAGA	AUGCUUAAAUUCUGUUUGGUU	Cleavage	(+)
ath-miR1887	AT4G10170	Chr4:6345394-6345592	5	-1	UACUAAGUAGAGUCUAAGAGA	GAUUCUAGAUUCUGUUCAGUG	Cleavage	(+)
ath-miR1888a	AT1G60170	Chr1:22195220-22195370	5	-1	UAAGUUAAGAUUUGUGAAGAA	CGUUUUAUAAAUUUUAUUUUU	Cleavage	(+)
ath-miR1888b	AT5G08060	Chr5:2582368-2582626	5	-1	UUAGGCUAAGAUUUGUGAAGA	UUUUUAUGAAUUUUACCCCAA	Cleavage	(+)
ath-miR1888b	AT3G27380	Chr3:10130829-10131051	5	-1	UUAGGCUAAGAUUUGUGAAGA	GUAUUAUCAAUCAUAGCUUAA	Cleavage	(-)
ath-miR2111a-5p	AT1G03440	Chr1:853900-854136	5	-1	UAAUCUGCAUCCUGAGGUUUA	UUGAUGUGAGGAUGAAGAUUG	Cleavage	(+)
ath-miR2111b-3p	AT2G46000	Chr2:18920917-18921113	5	-1	AUCCUCGGGAUACAGUUUACC	AAUAACCUGAAUCCUGGGAAU	Cleavage	(-)
ath-miR2111b-5p	AT1G03440	Chr1:853900-854136	5	-1	UAAUCUGCAUCCUGAGGUUUA	UUGAUGUGAGGAUGAAGAUUG	Cleavage	(+)
ath-miR2933a	AT5G50150	Chr5:20402267-20402407	5	-1	GAAAUCGGAGAGGAAAUUCGCC	UUUUUAUUUCUUCUUAGAUUUU	Cleavage	(-)
ath-miR2933a	AT3G44330	Chr3:16010817-16011039	5	-1	GAAAUCGGAGAGGAAAUUCGCC	UUGUAGUUUUUUCUUUGGUUUA	Cleavage	(+)
ath-miR2933a	AT3G55420	Chr3:20548610-20548783	5	-1	GAAAUCGGAGAGGAAAUUCGCC	CUGUAUUUUUUUCUUUGAUUUG	Cleavage	(+)
ath-miR2933b	AT5G50150	Chr5:20402267-20402407	5	-1	GAAAUCGGAGAGGAAAUUCGCC	UUUUUAUUUCUUCUUAGAUUUU	Cleavage	(-)
ath-miR2933b	AT3G44330	Chr3:16010817-16011039	5	-1	GAAAUCGGAGAGGAAAUUCGCC	UUGUAGUUUUUUCUUUGGUUUA	Cleavage	(+)
ath-miR2933b	AT3G55420	Chr3:20548610-20548783	5	-1	GAAAUCGGAGAGGAAAUUCGCC	CUGUAUUUUUUUCUUUGAUUUG	Cleavage	(+)
ath-miR2934-3p	AT5G40920	Chr5:16400671-16404239	5	-1	CAUCCAAGGUGUUUGUAGAAA	UCGCUGACAGUACUUUGGAUG	Cleavage	(+)
ath-miR2936	AT2G18328	Chr2:7964787-7964875	5	-1	CUUGAGAGAGAGAACACAGACG	UUUUUUUGUUUUUUUUUUUAAU	Cleavage	(+)
ath-miR2936	AT1G01320	Chr1:121137-121521	5	-1	CUUGAGAGAGAGAACACAGACG	UUUCUGGGGUUUUUCUUUUAAU	Cleavage	(-)
ath-miR2936	AT5G54920	Chr5:22305643-22305780	5	-1	CUUGAGAGAGAGAACACAGACG	UGGAUUUUUUUUCUUUCUCAAU	Cleavage	(+)
ath-miR2936	AT5G09460	Chr5:2943711-2944339	5	-1	CUUGAGAGAGAGAACACAGACG	UGCUUCUGUUGUUUCUCUCAUG	Cleavage	(-)
ath-miR2936	AT1G60170	Chr1:22195220-22195370	5	-1	CUUGAGAGAGAGAACACAGACG	AAACUGCUUUCUCUAUCUCAUG	Cleavage	(+)
ath-miR2936	AT1G55210	Chr1:20597781-20597980	5	-1	CUUGAGAGAGAGAACACAGACG	UUCUUUUUUUUUUUCUUUUGAG	Cleavage	(-)
ath-miR2937	AT5G18230	Chr5:6021444-6021505	5	-1	AUAAGAGCUGUUGAAGGAGUC	UUCUUCGUUAACGACUCUUAA	Cleavage	(-)
ath-miR2938	AT5G67030	Chr5:26753580-26753698	5	-1	GAUCUUUUGAGAGGGUUCCAG	UAGUAAUUUUCUCAAAAGAAA	Cleavage	(-)
ath-miR2938	AT2G05620	Chr2:2080936-2081088	5	-1	GAUCUUUUGAGAGGGUUCCAG	UUGCCACUCUUUCAACAGAUU	Cleavage	(-)
ath-miR319a	AT2G45280	Chr2:18672116-18672205	5	-1	UUGGACUGAAGGGAGCUCCCU	CAUGAGUUUUUUUCGGCCCAA	Cleavage	(+)
ath-miR319b	AT2G45280	Chr2:18672116-18672205	5	-1	UUGGACUGAAGGGAGCUCCCU	CAUGAGUUUUUUUCGGCCCAA	Cleavage	(+)
ath-miR319c	AT2G45280	Chr2:18672116-18672205	5	-1	UUGGACUGAAGGGAGCUCCUU	CAUGAGUUUUUUUCGGCCCAA	Cleavage	(+)
ath-miR3440b-3p	AT2G18162	Chr2:7898292-7898791	5	-1	UGGAUUGGUCAAGGGAAGCGU	UCGUUGAUCUUGUUCAAUCCA	Cleavage	(-)
ath-miR3440b-5p	AT5G65660	Chr5:26245166-26245338	5	-1	UUUUCUUGGCCCAUCCACUUC	UAAAUGGUUGUGCCAAAAAAA	Translation	(-)
ath-miR3440b-5p	AT2G47020	Chr2:19319811-19319994	5	-1	UUUUCUUGGCCCAUCCACUUC	GCAGUGCAUGGGUAGAGACAA	Cleavage	(-)
ath-miR390a-5p	AT3G59280	Chr3:21908926-21909170	5	-1	AAGCUCAGGAGGGAUAGCGCC	AAAGCUAUCCUUCCUGUUUUU	Cleavage	(-)
ath-miR390b-5p	AT3G59280	Chr3:21908926-21909170	5	-1	AAGCUCAGGAGGGAUAGCGCC	AAAGCUAUCCUUCCUGUUUUU	Cleavage	(-)
ath-miR3932a	AT5G62640	Chr5:25149433-25149491	5	-1	AACUUUGUGAUGACAACGAAG	UUUUGUUUUCAUUACCAAUUU	Cleavage	(-)
ath-miR3932b-3p	AT5G62640	Chr5:25149433-25149491	5	-1	AACUUUGUGAUGACAACGAAG	UUUUGUUUUCAUUACCAAUUU	Cleavage	(-)
ath-miR3933	AT5G56980	Chr5:23056271-23056406	5	-1	AGAAGCAAAAUGACGACUCGG	CUAGGACGUUGUUUUGCGUCU	Cleavage	(-)
ath-miR3933	AT5G03850	Chr5:1028385-1028523	5	-1	AGAAGCAAAAUGACGACUCGG	UGGAGUCUUAAUUUUGUUGUU	Cleavage	(-)
ath-miR3933	AT1G20670	Chr1:7164132-7164386	5	-1	AGAAGCAAAAUGACGACUCGG	AAGACUUGUCAGUUUAUUUCU	Translation	(-)
ath-miR393b-3p	AT1G10500	Chr1:3460004-3460081	5	-1	AUCAUGCGAUCUCUUUGGAUU	UUUUUAAAAAAAUUGUAUGAU	Translation	(-)
ath-miR393b-3p	AT5G40920	Chr5:16400671-16404239	5	-1	AUCAUGCGAUCUCUUUGGAUU	AGGCCAAAGAGAUU-CGUGAU	Cleavage	(+)
ath-miR395a	AT3G10050	Chr3:3098728-3098991	5	-1	CUGAAGUGUUUGGGGGAACUC	UGGUUUCUCCAAGCAAUUUGA	Cleavage	(-)
ath-miR395a	AT5G46190	Chr5:18723140-18723360	5	-1	CUGAAGUGUUUGGGGGAACUC	AUCUCUCAUCAAACAUUUCGG	Cleavage	(-)
ath-miR395b	AT5G40920	Chr5:16400671-16404239	5	-1	CUGAAGUGUUUGGGGGGACUC	AGGCUUCCUCUGACAUUUCAG	Translation	(+)
ath-miR395c	AT5G40920	Chr5:16400671-16404239	5	-1	CUGAAGUGUUUGGGGGGACUC	AGGCUUCCUCUGACAUUUCAG	Translation	(+)
ath-miR395d	AT3G10050	Chr3:3098728-3098991	5	-1	CUGAAGUGUUUGGGGGAACUC	UGGUUUCUCCAAGCAAUUUGA	Cleavage	(-)
ath-miR395d	AT5G46190	Chr5:18723140-18723360	5	-1	CUGAAGUGUUUGGGGGAACUC	AUCUCUCAUCAAACAUUUCGG	Cleavage	(-)
ath-miR395e	AT3G10050	Chr3:3098728-3098991	5	-1	CUGAAGUGUUUGGGGGAACUC	UGGUUUCUCCAAGCAAUUUGA	Cleavage	(-)
ath-miR395e	AT5G46190	Chr5:18723140-18723360	5	-1	CUGAAGUGUUUGGGGGAACUC	AUCUCUCAUCAAACAUUUCGG	Cleavage	(-)
ath-miR395f	AT5G40920	Chr5:16400671-16404239	5	-1	CUGAAGUGUUUGGGGGGACUC	AGGCUUCCUCUGACAUUUCAG	Translation	(+)
ath-miR398b-5p	AT5G55250	Chr5:22407445-22407580	5	-1	AGGGUUGAUAUGAGAACACAC	UCGUGUGCUUGUUUUAACUUU	Cleavage	(-)
ath-miR398c-5p	AT5G55250	Chr5:22407445-22407580	5	-1	AGGGUUGAUAUGAGAACACAC	UCGUGUGCUUGUUUUAACUUU	Cleavage	(-)
ath-miR399e	AT4G23820	Chr4:12397035-12397140	5	-1	UGCCAAAGGAGAUUUGCCUCG	AUAAGCAAGUCUUUUUUUGUG	Cleavage	(-)
ath-miR399e	AT1G14440	Chr1:4938766-4938946	5	-1	UGCCAAAGGAGAUUUGCCUCG	GUAAGAAAAUCUACUUUGGUU	Cleavage	(-)
ath-miR400	AT3G03530	Chr3:842497-842643	5	-1	UAUGAGAGUAUUAUAAGUCAC	UGCACAUUUGAUAUUCUUGUA	Cleavage	(-)
ath-miR403-3p	AT5G41350	Chr5:16541505-16541758	5	-1	UUAGAUUCACGCACAAACUCG	UCAGUUUUUUCUUGAGUUUAA	Translation	(-)
ath-miR403-5p	AT1G48170	Chr1:17789742-17790000	5	-1	UGUUUUGUGCUUGAAUCUAAUU	UAUUAC-UUCGACCACAAAACA	Translation	(+)
ath-miR407	AT1G28680	Chr1:10079769-10079914	5	-1	UUUAAAUCAUAUACUUUUGGU	GCUCAGUGUAUUUGAUUUGAA	Translation	(+)
ath-miR407	AT4G11740	Chr4:7075340-7075415	5	-1	UUUAAAUCAUAUACUUUUGGU	UGGAGGAUUAUAUGGUUUAUA	Cleavage	(+)
ath-miR408-5p	AT1G14685	Chr1:5044077-5044354	5	-1	ACAGGGAACAAGCAGAGCAUG	UUUGCUUUGUUUUUUGUUUGU	Cleavage	(+)
ath-miR408-5p	AT1G79930	Chr1:30063475-30063629	5	-1	ACAGGGAACAAGCAGAGCAUG	UUUUUUCUUAUUGUUCCUUGU	Cleavage	(-)
ath-miR408-5p	AT1G67550	Chr1:25317193-25317359	5	-1	ACAGGGAACAAGCAGAGCAUG	AGUGGCUUGCUUGAUUCUUGU	Cleavage	(+)
ath-miR413	AT2G32480	Chr2:13788519-13788676	5	-1	AUAGUUUCUCUUGUUCUGCAC	GAGGAGGAAGAGAGAAACUUU	Cleavage	(-)
ath-miR415	AT3G59020	Chr3:21810279-21810682	5	-1	AACAGAGCAGAAA-CAGAACAU	AUUUUCUGCUUUUUGCUUUGUU	Cleavage	(-)
ath-miR415	AT2G18328	Chr2:7964787-7964875	5	-1	AACAGAGCAGAAACAGAACAU	GCUUUCUUUUUUUGUUUUUUU	Cleavage	(+)
ath-miR415	AT1G20330	Chr1:7038594-7038845	5	-1	AACAGAGCAGAAACAGAACAU	UUAGUUUUUUUUUGUUUUGUU	Cleavage	(-)
ath-miR415	AT1G11290	Chr1:3791145-3791234	5	-1	AACAGAGCAGAAACAGAACA	AGCUCUGUUUUUCCUUUCUU	Cleavage	(-)
ath-miR415	AT1G33680	Chr1:12208524-12208698	5	-1	AACAGAGCAGAAACAGAACAU	UGCUUCAGUUUUUGUUUUUUU	Cleavage	(+)
ath-miR415	AT5G48070	Chr5:19483310-19483511	5	-1	AACAGAGCAGAAACAGAACAU	UUGUUUU-UUUUUGUUCUAUU	Cleavage	(+)
ath-miR415	AT1G76010	Chr1:28528082-28528488	5	-1	AACAGAGCAGAAACAGAACAU	CUUUUCU-UUUUUCCUCUGUU	Cleavage	(-)
ath-miR417	AT1G45230	Chr1:17169548-17169859	5	-1	GAAGGUAGUGAAUUUGUUCGA	UUUAAUAUGUUCAUUAUCUUG	Cleavage	(-)
ath-miR417	AT5G58030	Chr5:23486751-23486824	5	-1	GAAGGUAGUGAAUUUGUUCGA	GCAAACAUGUUUACUGUUUUU	Cleavage	(-)
ath-miR417	AT3G08640	Chr3:2624121-2624236	5	-1	GAAGGUAGUGAAUUUGUUCGA	UAGGCCAAGUUUGUUGUUUUC	Cleavage	(+)
ath-miR418	AT1G74690	Chr1:28061177-28061325	5	-1	UAAUGUGAUGAUGAACUGACC	UUCUGGUUUUUCGUUACAUUA	Cleavage	(-)
ath-miR418	AT5G48620	Chr5:19721040-19721358	5	-1	UAAUGUGAUGAUGAACUGACC	UUUCAGUGAAUCGUUAUGUUG	Cleavage	(+)
ath-miR418	AT5G60630	Chr5:24369645-24369770	5	-1	UAAUGUGAUGAUGAACUGACC	UAUAACUUCAUCUUUACAUUC	Cleavage	(-)
ath-miR420	AT1G68490	Chr1:25695001-25695553	5	-1	UAAACUAAUCACGGAAAUGCA	UGUUUUUUUGUGGUUAUUUUG	Cleavage	(+)
ath-miR4221	AT5G25280	Chr5:8774794-8775566	5	-1	UUUUCCUCUGUUGAAUUCUUGC	CGGAGAAUUUGAUAAAGGACGA	Cleavage	(+)
ath-miR4221	AT1G23490	Chr1:8338581-8338778	5	-1	UUUUCCUCUGUUGAAUUCUUGC	AUAUGAAUCAAGUAGAGGAAAG	Cleavage	(+)
ath-miR4221	AT3G14650	Chr3:4924215-4924689	5	-1	UUUUCCUCUGUUGAAUUCUUGC	UUGUCAGAUAAACAGAGGAAAA	Cleavage	(+)
ath-miR4221	AT2G25180	Chr2:10724309-10724389	5	-1	UUUUCCUCUGUUGAAUUCUUGC	UAAAGAAAACAACAAAGAAAAA	Cleavage	(-)
ath-miR4221	AT3G54020	Chr3:20008157-20008239	5	-1	UUUUCCUCUGUUGAAUUCUUGC	UUCACAAUUUGACAAAGGAUAA	Cleavage	(+)
ath-miR4221	AT3G55630	Chr3:20639409-20639490	5	-1	UUUUCCUCUGUUGAAUUCUUGC	AACAUGAUUUAACAAAAGAAAA	Cleavage	(+)
ath-miR4239	AT5G41860	Chr5:16758610-16758682	5	-1	UUUGUUAUUUUCGCAUGCUC	UAUGAUGUGAAAAUGAUGAA	Cleavage	(+)
ath-miR4239	AT3G14350	Chr3:4782765-4783066	5	-1	UUUGUUAUUUUCGCAUGCUCC	UGAUGAUGAGAGAAUAACAAC	Cleavage	(-)
ath-miR4239	AT5G08430	Chr5:2720146-2720296	5	-1	UUUGUUAUUUUCGCAUGCUCC	AAAGGAUGUGAAGCUAACAGU	Cleavage	(+)
ath-miR4239	AT1G19680	Chr1:6807777-6807863	5	-1	UUUGUUAUUUUCGCAUGCUCC	GUAGAAUGCAGAAGAAACAAA	Cleavage	(+)
ath-miR4239	AT2G37710	Chr2:15814606-15814760	5	-1	UUUGUUAUUUUCGCAUGCUCC	UAAUCAUGUGGGCAUAAUAAG	Cleavage	(-)
ath-miR4243	AT2G33255	Chr2:14100465-14100578	5	-1	UUGAAAUUGUAGAUUUCGUAC	UUGUUAAAUCCAAAAUUUCAA	Translation	(+)
ath-miR4243	AT4G19600	Chr4:10676678-10676851	5	-1	UUGAAAUUGUAGAUUUCGUAC	UUAGGGUCUCUAUAAUUUUGA	Cleavage	(+)
ath-miR4243	AT1G28680	Chr1:10079769-10079914	5	-1	UUGAAAUUGUAGAUUUCGUAC	CAACCAUUUGUACAAUUUCGA	Cleavage	(+)
ath-miR426	AT3G27750	Chr3:10285548-10285875	5	-1	UUUUGGAAAUUUGUCCUUACG	GGUAGCGAAAAAUUUACGAAA	Cleavage	(+)
ath-miR426	AT1G22950	Chr1:8125030-8125156	5	-1	UUUUGGAAAUUUGUCCUUACG	UGUAACAAUAAAUUUCUUAGA	Cleavage	(-)
ath-miR426	AT5G23280	Chr5:7843897-7844345	5	-1	UUUUGGAAAUUUGUCCUUACG	AAAAAGGGAAAAUUUCAGAAA	Cleavage	(+)
ath-miR447a-3p	AT1G77200	Chr1:29004248-29004329	5	-1	UUGGGGACGAGAUGUUUUG	AAAAACAUUUAGCCUCCAA	Cleavage	(-)
ath-miR447a.2-3p	AT3G46900	Chr3:17269511-17269616	5	-1	UAUGGAAGAAAUUGUAGUAUU	AAUUCCACAAUUUCUUGAAUA	Cleavage	(+)
ath-miR447a.2-3p	AT2G31230	Chr2:13306516-13306599	5	-1	UAUGGAAGAAAUUGUAGUAU	AUUCUGCAAUUUCUUUGGUU	Cleavage	(-)
ath-miR447a.2-3p	AT4G33540	Chr4:16133868-16133966	5	-1	UAUGGAAGAAAUUGUAGUAUU	UUUUUUACGAUAUUUUUCAUG	Translation	(+)
ath-miR447a.2-3p	AT1G53165	Chr1:19819351-19819547	5	-1	UAUGGAAGAAAUUGUAGUAUU	ACUCUUACCAUUUCAUUCAUA	Cleavage	(+)
ath-miR447b	AT1G77200	Chr1:29004248-29004329	5	-1	UUGGGGACGAGAUGUUUUG	AAAAACAUUUAGCCUCCAA	Cleavage	(-)
ath-miR447c-3p	AT1G68490	Chr1:25695001-25695553	5	-1	UUGGGGACGACAUCUUUUGUUG	UCUGAAAAGAUGUGGUUUUUGA	Cleavage	(+)
ath-miR472-5p	AT5G03850	Chr5:1028385-1028523	5	-1	AUGGUCGAAGUAGGCAAAAUC	UCUUUUGCUUUCUUUGAUUGG	Translation	(-)
ath-miR472-5p	AT5G24320	Chr5:8284478-8284826	5	-1	AUGGUCGAAGUAGGCAAAAUC	AUUUUUGCCUUUUUUAAUCGU	Translation	(-)
ath-miR5014a-3p	AT2G45010	Chr2:18569734-18569829	5	-1	UUGUACAAAUUUAAGUGUACG	AGUACUCUUAAGUUU-UACAG	Cleavage	(+)
ath-miR5014a-3p	AT5G34850	Chr5:13108067-13108294	5	-1	UUGUACAAAUUUAAGUGUACG	AUUACAUGGAGAUUUGUCCAA	Cleavage	(-)
ath-miR5014a-5p	AT5G11700	Chr5:3762519-3762870	5	-1	ACACUUAGUUUUGUACAACAU	AGGUUGUAUGUAAAUAAGUGA	Translation	(-)
ath-miR5015	AT5G09672	Chr5:2995911-2996508	5	-1	UUGGUGUUAUGUGUAGUCUUC	AUGCGCUGCGCAUAACACUAU	Cleavage	(-)
ath-miR5015	AT3G14650	Chr3:4924215-4924689	5	-1	UUGGUGUUAUGUGUAGUCUUC	UCAGUCUACCUAUAAUGCUAG	Cleavage	(+)
ath-miR5015	AT5G67030	Chr5:26753580-26753698	5	-1	UUGGUGUUAUGUGUAGUCUUC	AUAAAUUAUACAAGACAUUAA	Cleavage	(-)
ath-miR5015	AT5G49945	Chr5:20319619-20319837	5	-1	UUGGUGUUAUGUGUAGUCUUC	UGAGAGUUUGUAUAACAUUGA	Cleavage	(+)
ath-miR5015	AT4G21580	Chr4:11477589-11477702	5	-1	UUGGUGUUAUGUGUAGUCUUC	AUGGAACAUAUAUAGUAUCAA	Cleavage	(+)
ath-miR5016	AT3G52640	Chr3:19514874-19514934	5	-1	UUCUUGUGGAUUCCUUGGAAA	CUGGCAAGAAAUUUAUAAGAA	Cleavage	(-)
ath-miR5017-3p	AT3G55420	Chr3:20548610-20548783	5	-1	UUAUACCAAAUUAAUAGCAAA	UUUGUUAUUAAUUUCCUGUAU	Cleavage	(+)
ath-miR5017-3p	AT5G02770	Chr5:627089-627884	5	-1	UUAUACCAAAUUAAUAGCAAA	CUUUCUGUUAAUUUUGAAUGA	Cleavage	(-)
ath-miR5017-5p	AT3G59280	Chr3:21908926-21909170	5	-1	AUUUGUUACUAAUUUGGAAUG	CACAUUAAAUUAGUAAUAACU	Cleavage	(-)
ath-miR5017-5p	AT3G04130	Chr3:1085881-1086237	5	-1	AUUUGUUACUAAUUUGGAAUG	UUUUUGAAAUUAUUAAUAGAA	Cleavage	(+)
ath-miR5017-5p	AT5G52530	Chr5:21321075-21321188	5	-1	AUUUGUUACUAAUUUGGAAUG	AUUUCUAUAUUUGUAGAAAAU	Translation	(+)
ath-miR5017-5p	AT1G19490	Chr1:6751556-6751771	5	-1	AUUUGUUACUAAUUUGGAAUG	UUUUACAAGGUAAUAGCAAAU	Cleavage	(-)
ath-miR5017-5p	AT2G27228	Chr2:11653909-11654133	5	-1	AUUUGUUACUAAUUUGGAAUG	UUUUGUACAUUAGUUGCGAAU	Cleavage	(+)
ath-miR5019	AT2G46720	Chr2:19200298-19200407	5	-1	UGUUGGGAAAGAAAAACUCUU	UUUUUUUUUUUUUUCCCCACA	Cleavage	(+)
ath-miR5019	AT5G50150	Chr5:20402267-20402407	5	-1	UGUUGGGAAAGAAAAACUCUU	UAGAUUUUUUUUUUUUUGGUG	Cleavage	(-)
ath-miR5019	AT5G23280	Chr5:7843897-7844345	5	-1	UGUUGGGAAAGAAAAACUCUU	GUCUGUUUUUUUUUUCCGGUG	Cleavage	(+)
ath-miR5019	AT3G27320	Chr3:10092522-10092768	5	-1	UGUUGGGAAAGAAAAACUCUU	ACGUGUUUCUCUUUUCUGGUA	Cleavage	(+)
ath-miR5020a	AT5G52882	Chr5:21433879-21434060	5	-1	UGGAAGAAGGUGAGACUUGCA	UUUAGGUUUCAUCUUAUUCUC	Cleavage	(-)
ath-miR5020a	AT3G48820	Chr3:18099728-18099803	5	-1	UGGAAGAAGGUGAGACUUGCA	UCCAUGUCUUACCUUGUACUA	Cleavage	(-)
ath-miR5020b	AT1G52060	Chr1:19358827-19358912	5	-1	AUGGCAUGAAAGAAGGUGAGA	CCUCAUCUUCUUUAAUUUCAC	Cleavage	(-)
ath-miR5020b	AT5G51150	Chr5:20791574-20791776	5	-1	AUGGCAUGAAAGAAGGUGAGA	UUUUAUUUUCUUUCACGUAAU	Cleavage	(+)
ath-miR5020b	AT1G08200	Chr1:2573954-2574175	5	-1	AUGGCAUGAAAGAAGGUGAGA	UCUUCCCUUAUUUUAGGCCAU	Cleavage	(-)
ath-miR5020c	AT3G57200	Chr3:21172305-21172391	5	-1	UGGCAUGGAAGAAGGUGAGAC	UACUAGUCUUCUUUUGUGCUC	Cleavage	(+)
ath-miR5020c	AT5G03370	Chr5:825483-825639	5	-1	UGGCAUGGAAGAAGGUGAGAC	UGUUCUUCUUCUUUCUUGCCU	Cleavage	(-)
ath-miR5021	AT3G61750	Chr3:22857609-22857810	5	-1	UGAGAAGAAGAAGAAGAAAA	UUUUUUUUUUUUUUUUUUGG	Cleavage	(-)
ath-miR5021	AT1G50370	Chr1:18661789-18661885	5	-1	UGAGAAGAAGAAGAAGAAAA	UUUUUUUUUUCCUUUUUCCA	Cleavage	(+)
ath-miR5021	AT3G52800	Chr3:19570510-19570692	5	-1	UGAGAAGAAGAAGAAGAAAA	UUGGCUUUUUCUUUUUAUUA	Cleavage	(+)
ath-miR5021	AT2G46720	Chr2:19200298-19200407	5	-1	UGAGAAGAAGAAGAAGAAAA	UUUUUUUUUUUUUUUCCCCA	Cleavage	(+)
ath-miR5021	AT5G58760	Chr5:23730503-23730636	5	-1	UGAGAAGAAGAAGAAGAAAA	UUUGCUUCUUUUUUCUUUUG	Cleavage	(-)
ath-miR5021	AT4G22340	Chr4:11799960-11800095	5	-1	UGAGAAGAAGAAGAAGAAAA	AAGUUUUUUUGUUUUUCUCA	Translation	(-)
ath-miR5021	AT1G18420	Chr1:6345758-6345884	5	-1	UGAGAAGAAGAAGAAGAAAA	AUUUUUUUUUGUUAUUUUCG	Translation	(+)
ath-miR5021	AT3G03500	Chr3:834488-834581	5	-1	UGAGAAGAAGAAGAAGAAAA	GUAUCUUCUUCUUAUUGUCU	Cleavage	(+)
ath-miR5021	AT5G64270	Chr5:25710778-25710900	5	-1	UGAGAAGAAGAAGAAGAAAA	GUUUCUU-UUCUUUUUCUGA	Cleavage	(+)
ath-miR5021	AT2G45970	Chr2:18912147-18912385	5	-1	UGAGAAGAAGAAGAAGAAAA	UGUUCCUUUUUUUUUACUCA	Cleavage	(-)
ath-miR5021	AT5G28530	Chr5:10524758-10525041	5	-1	UGAGAAGAAGAAGAAGAAAA	GUUUCUGUCUUUUUUUCUUG	Cleavage	(-)
ath-miR5023	AT2G37280	Chr2:15656437-15656530	5	-1	AUUGGUAGUGGAUAAGGGGGC	UUUUCCUUAUACAUUGUCAAA	Translation	(+)
ath-miR5023	AT3G53700	Chr3:19902664-19902857	5	-1	AUUGGUAGUGGAUAAGGGGGC	CCUCUCUCGUCCACUUCUAGU	Cleavage	(+)
ath-miR5024-3p	AT1G07010	Chr1:2155060-2155237	5	-1	CCGUAUCUUGGCCUUGUCAUU	UCAGACAAGGUCCAGAUGCAG	Cleavage	(+)
ath-miR5024-5p	AT3G21280	Chr3:7478001-7478095	5	-1	AUGACAAGGCCAAGAUAUAACA	UAUUAUUUUUUGUUGUUGUCAU	Translation	(-)
ath-miR5024-5p	AT4G32960	Chr4:15908631-15908766	5	-1	AUGACAAGGCCAAGAUAUAACA	UUGUAUCUUUUGGUCAUGACAU	Cleavage	(-)
ath-miR5024-5p	AT5G44005	Chr5:17704967-17705106	5	-1	AUGACAAGGCCAAGAUAUAACA	UAAUUUAUCUUAGCUUUGUAGU	Translation	(-)
ath-miR5025	AT3G49670	Chr3:18421089-18421151	5	-1	ACUGUAUAUAUGUAAGUGACA	CAGCAUAUAUAUACAUGCAGU	Cleavage	(+)
ath-miR5025	AT5G38020	Chr5:15165646-15165889	5	-1	ACUGUAUAUAUGUAAGUGACA	AGUGAUAUAUAUAUAUAUAAU	Cleavage	(-)
ath-miR5025	AT5G49890	Chr5:20288043-20288234	5	-1	ACUGUAUAUAUGUAAGUGACA	UCUUCUUUACAUGUAGGUAGU	Cleavage	(-)
ath-miR5025	AT1G13210	Chr1:4509011-4509166	5	-1	ACUGUAUAUAUGUAAGUGACA	UAUAAUUGAUAUAUAUAUACU	Cleavage	(-)
ath-miR5025	AT1G01320	Chr1:121137-121521	5	-1	ACUGUAUAUAUGUAAGUGACA	CUUCAAAGACAUGUAUACACU	Cleavage	(-)
ath-miR5028	AT3G23820	Chr3:8605111-8605563	5	-1	AAUUGGGUUUAUGCUAGAGUU	AACUGUAACAUAAAUUUUAUU	Cleavage	(+)
ath-miR5028	AT1G53345	Chr1:19903633-19903734	5	-1	AAUUGGGUUUAUGCUAGAGUU	CCCUUUAGAAUAUAUUCGAUU	Cleavage	(+)
ath-miR5028	AT2G32590	Chr2:13829189-13829264	5	-1	AAUUGGGUUUAUGCUAGAGUU	UACAAUAGUAUGAAUCAAAUU	Cleavage	(-)
ath-miR5028	AT1G44414	Chr1:16848173-16848288	5	-1	AAUUGGGUUUAUGCUAGAGUU	UGUUCUGUCCUAAACCCAAAU	Cleavage	(+)
ath-miR5028	AT4G39900	Chr4:18508318-18508505	5	-1	AAUUGGGUUUAUGCUAGAGUU	UGCUCUUGCAAAUGCCUAAUU	Translation	(-)
ath-miR5029	AT5G03370	Chr5:825483-825639	5	-1	AAUGAGAGAGAACACUGCAAA	UUUCUGGUAUUUUUUUUCAUU	Cleavage	(-)
ath-miR5029	AT3G44330	Chr3:16010817-16011039	5	-1	AAUGAGAGAGAACACUGCAAA	AUUGUAGUUUUUUCUUUGGUU	Cleavage	(+)
ath-miR5029	AT2G25900	Chr2:11042887-11043081	5	-1	AAUGAGAGAGAACACUGCAAA	UCUGCAGUUUUUUUUAUUGUU	Cleavage	(+)
ath-miR5029	AT1G73210	Chr1:27528051-27528321	5	-1	AAUGAGAGAGAACACUGCAAA	AUCGCGGAGUUUUUUCUCCUU	Cleavage	(-)
ath-miR5029	AT5G02170	Chr5:430546-430696	5	-1	AAUGAGAGAGAACACUGCAAA	UCUUCAUUUUUUUUUUUCAUU	Cleavage	(+)
ath-miR5029	AT5G53480	Chr5:21716752-21717881	5	-1	AAUGAGAGAGAACACUGCAAA	UUUCUUUUGUUUUCUUUUAUU	Cleavage	(+)
ath-miR5595a	AT5G40920	Chr5:16400671-16404239	5	-1	ACAUAUGAUCUGCAUCUUUGC	AUGAAAGUGUUGAUUAUGUGU	Translation	(+)
ath-miR5628	AT2G24050	Chr2:10225293-10225387	5	-1	GAAAUAGCGAAGAUAUGAUUA	UUGUUACAUCUUUGUUUUUUU	Cleavage	(-)
ath-miR5628	AT5G64600	Chr5:25828005-25828106	5	-1	GAAAUAGCGAAGAUAUGAUUA	CCUUGAUAUCUUUUCUGUUUU	Cleavage	(+)
ath-miR5628	AT5G38020	Chr5:15165646-15165889	5	-1	GAAAUAGCGAAGAUAUGAUUA	UUGUUACAUCUUCUUUAUUUA	Cleavage	(-)
ath-miR5628	AT1G68490	Chr1:25695001-25695553	5	-1	GAAAUAGCGAAGAUAUGAUUA	GAAGGGUAUUUUCGAUAUUUU	Cleavage	(+)
ath-miR5628	AT5G51150	Chr5:20791574-20791776	5	-1	GAAAUAGCGAAGAUAUGAUUA	CCACUGUCUCUUCUUUAUUUC	Cleavage	(+)
ath-miR5629	AT2G46000	Chr2:18920917-18921113	5	-1	UUAGGGUAGUUAACGGAAGUU	AGUUUCCGUUGAAUGCCGUAG	Cleavage	(-)
ath-miR5629	AT3G26922	Chr3:9923980-9924670	5	-1	UUAGGGUAGUUAACGGAAGUUA	UAGCUUGUGGUCACUAUCCUAA	Translation	(+)
ath-miR5631	AT5G28530	Chr5:10524758-10525041	5	-1	UGGCAGGAAAGACAUAAUU	AGAUAUGUCGUUUCUGUCU	Translation	(-)
ath-miR5632-3p	AT2G42975	Chr2:17874843-17875017	5	-1	UUGGAUUUAUAGUUGGAUAAG	AUUGUCCAAUGAUAAAUAUAG	Translation	(+)
ath-miR5632-3p	AT5G09850	Chr5:3063175-3063463	5	-1	UUGGAUUUAUAGUUGGAUAAG	UUUAUUAAAUAAUAGAUUCGA	Translation	(-)
ath-miR5632-3p	AT5G09230	Chr5:2873664-2873788	5	-1	UUGGAUUUAUAGUUGGAUAAG	AACAUCAAAUAAUAGAUUCAA	Translation	(+)
ath-miR5632-3p	AT2G25830	Chr2:11018715-11018955	5	-1	UUGGAUUUAUAGUUGGAUAAG	UUUGGGAAAUUAUGAAUCUAA	Cleavage	(-)
ath-miR5632-3p	AT5G41080	Chr5:16443887-16443970	5	-1	UUGGAUUUAUAGUUGGAUAAG	UGUAAAUAAUUAUAAAUUUAU	Cleavage	(+)
ath-miR5632-3p	AT3G51400	Chr3:19077943-19078019	5	-1	UUGGAUUUAUAGUUGGAUAAG	UGUAUAAAACUAUAAAUGAAA	Cleavage	(-)
ath-miR5633	AT1G59780	Chr1:21993245-21993325	5	-1	UAUGAUCAUCAGAAAACAGUG	UUCUUUUUUUUAAUUAUCAUG	Translation	(-)
ath-miR5633	AT5G10020	Chr5:3137036-3137179	5	-1	UAUGAUCAUCAGAAAACAGUG	AUUUAUUUUUUGUUGAUUAUU	Cleavage	(+)
ath-miR5633	AT5G50150	Chr5:20402267-20402407	5	-1	UAUGAUCAUCAGAAAACAGUG	UUUUUUUUUUUGGUGUUUGUA	Cleavage	(-)
ath-miR5633	AT5G65560	Chr5:26200281-26200605	5	-1	UAUGAUCAUCAGAAAACAGUG	UUUUGUCUUCUGUUGCUUAUA	Cleavage	(-)
ath-miR5636	AT3G16940	Chr3:5786139-5786277	5	-1	CGUAGUUGCAGAGCUUGACGG	UUGUCUAUUUCUGUAACUGGG	Cleavage	(+)
ath-miR5637	AT5G47560	Chr5:19287387-19287779	5	-1	AAUGCGCAACUCUAUAUUUCC	GUUAAUACAGAUUUGUGUGUU	Translation	(-)
ath-miR5638a	AT3G55420	Chr3:20548610-20548783	5	-1	AUACCAAAACUCUCUCACUUU	UGGGUGGAAGAUUGUUGGUAU	Translation	(+)
ath-miR5640	AT2G02870	Chr2:839975-840193	5	-1	UGAGAGAAGGAAUUAGAUUCA	UUAAUCAAAUUUGUUUUCUAA	Cleavage	(+)
ath-miR5640	AT2G32340	Chr2:13734390-13734565	5	-1	UGAGAGAAGGAAUUAGAUUCA	AGCUUCUAAUUCAUUUUUUUA	Cleavage	(+)
ath-miR5640	AT3G48690	Chr3:18037049-18037143	5	-1	UGAGAGAAGGAAUUAGAUU	AUUUUAGUUGCGUCUCUCA	Translation	(-)
ath-miR5640	AT5G61780	Chr5:24826749-24826885	5	-1	UGAGAGAAGGAAUUAGAUUCA	CUUAUCUUUUUUCUUCUUUUA	Cleavage	(+)
ath-miR5640	AT3G54920	Chr3:20348530-20348663	5	-1	UGAGAGAAGGAAUUAGAUUCA	CCAAUCAAAUGCUUUGUUUCA	Translation	(+)
ath-miR5640	AT2G27228	Chr2:11653909-11654133	5	-1	UGAGAGAAGGAAUUAGAUUCA	UAAGUGUGUUUUUUUUUCUCA	Cleavage	(+)
ath-miR5640	AT2G44520	Chr2:18381803-18381922	5	-1	UGAGAGAAGGAAUUAGAUUCA	AUAAUUGUAUUUUUUCUCUAA	Cleavage	(+)
ath-miR5640	AT4G26710	Chr4:13469769-13469935	5	-1	UGAGAGAAGGAAUUAGAUUCA	UCAAACAUAUUCUGUCUCUCA	Cleavage	(+)
ath-miR5641	AT5G03370	Chr5:825483-825639	5	-1	UGGAAGAAGAUGAUAGAAUUA	AUUUUCUGGUAUUUUUUUUCA	Cleavage	(-)
ath-miR5641	AT1G19000	Chr1:6560799-6560959	5	-1	UGGAAGAAGAUGAUAGAAUUA	AUAUUUUAUCAUUUAUCUCUA	Cleavage	(-)
ath-miR5641	AT5G61780	Chr5:24826749-24826885	5	-1	UGGAAGAAGAUGAUAGAAUUA	UUUUUUUCUUAUCUUUUUUCU	Cleavage	(+)
ath-miR5641	AT5G51150	Chr5:20791574-20791776	5	-1	UGGAAGAAGAUGAUAGAAUUA	CCUGUUUUUUAUUUUCUUUCA	Cleavage	(+)
ath-miR5641	AT2G20760	Chr2:8942757-8942973	5	-1	UGGAAGAAGAUGAUAGAAUUA	CAGUUGUUUCGUCUCUUUCCA	Cleavage	(-)
ath-miR5641	AT1G64060	Chr1:23776409-23776932	5	-1	UGGAAGAAGAUGAUAGAAUUA	UUUUUCUAUUUUUUUUUUUUA	Translation	(+)
ath-miR5641	AT1G76010	Chr1:28528082-28528488	5	-1	UGGAAGAAGAUGAUAGAAUUA	UUGUUCUCUCACUUUCUUUCU	Translation	(-)
ath-miR5647	AT1G48750	Chr1:18036421-18036581	5	-1	UCAAGUUUGAUGACGAUUCCA	GAUUAUCAUCAUCAUGCUUGA	Cleavage	(+)
ath-miR5648-3p	AT5G25070	Chr5:8640878-8641151	5	-1	AUCUGAAGAAAAUAGCGGCAU	GUUUCUCUGUUUACUUUAGAU	Cleavage	(-)
ath-miR5648-3p	AT5G40920	Chr5:16400671-16404239	5	-1	AUCUGAAGAAAAUAGCGGCAU	CCAUUGCUUUUUUCUUCAAAU	Cleavage	(+)
ath-miR5648-5p	AT5G45670	Chr5:18530344-18530426	5	-1	UUUGGAAAUAUUUGGCUUGACU	GUUCAAACCAAACAUAUUCAGA	Translation	(+)
ath-miR5648-5p	AT5G64600	Chr5:25828005-25828106	5	-1	UUUGGAAAUAUUUGGCUUGACU	UAGAAAGCCAGAAAUUUUUAAC	Translation	(+)
ath-miR5648-5p	AT5G61410	Chr5:24683613-24684065	5	-1	UUUGGAAAUAUUUGGCUUGACU	AAUCAAACUCAAUAUCUUCAAA	Cleavage	(-)
ath-miR5648-5p	AT1G18950	Chr1:6551651-6551971	5	-1	UUUGGAAAUAUUUGGCUUGACU	GGGUGAACCAGAUAUUCCUAAG	Cleavage	(+)
ath-miR5648-5p	AT2G39370	Chr2:16444027-16444131	5	-1	UUUGGAAAUAUUUGGCUUGACU	AUCCGACUCAAAUAUGUUCGGA	Cleavage	(-)
ath-miR5649a	AT3G03530	Chr3:842497-842643	5	-1	AUUGAAUAUGUUGGUUACUAU	CUAGUCUCUUGCAUAUUUAAU	Cleavage	(-)
ath-miR5649a	AT5G14060	Chr5:4539148-4539225	5	-1	AUUGAAUAUGUUGGUUACUAU	GAAAUAACCAGUGUGUUGAGU	Cleavage	(+)
ath-miR5649b	AT3G03530	Chr3:842497-842643	5	-1	AUUGAAUAUGUUGGUUACUAU	CUAGUCUCUUGCAUAUUUAAU	Cleavage	(-)
ath-miR5649b	AT5G14060	Chr5:4539148-4539225	5	-1	AUUGAAUAUGUUGGUUACUAU	GAAAUAACCAGUGUGUUGAGU	Cleavage	(+)
ath-miR5650	AT5G46410	Chr5:18828179-18829313	5	-1	UUGUUUUGGAUCUUAGAUACA	UAUUUUUAAGGUUCUGAGCAA	Cleavage	(+)
ath-miR5650	AT2G25450	Chr2:10829990-10830211	5	-1	UUGUUUUGGAUCUUAGAUACA	AUUAUGUAAAAUCUUAAAUAA	Cleavage	(-)
ath-miR5650	AT1G18660	Chr1:6425717-6425856	5	-1	UUGUUUUGGAUCUUAGAUACA	AAUAUGUAAGAUUCUUGACAA	Cleavage	(+)
ath-miR5650	AT1G80260	Chr1:30180648-30180705	5	-1	UUGUUUUGGAUCUUAGAUACA	GCUAUC-AAGGUUUAAAAAAA	Cleavage	(+)
ath-miR5651	AT1G71340	Chr1:26885176-26885479	5	-1	UUGUGCGGUUCAAAUAGUAAC	AACACUUUUCGGACUGCACAG	Cleavage	(-)
ath-miR5652	AT4G10080	Chr4:6300210-6300323	5	-1	UUGAAUGUGAAUGAAUCGGGC	UAGCGAUUUAUGUAUGUUCAG	Translation	(-)
ath-miR5652	AT5G55050	Chr5:22339767-22339950	5	-1	UUGAAUGUGAAUGAAUCGGGC	UACCGGUUUAGUUAAAUUUAA	Translation	(+)
ath-miR5652	AT2G46020	Chr2:18931951-18932053	5	-1	UUGAAUGUGAAUGAAUCGGGC	UUCCGAUAUGUUCAUGUAUAA	Cleavage	(+)
ath-miR5652	AT2G25870	Chr2:11034455-11034562	5	-1	UUGAAUGUGAAUGAAUCGGGC	UGUUGUUUUGUUCAUGUUCGG	Cleavage	(+)
ath-miR5653	AT2G37710	Chr2:15814606-15814760	5	-1	UGGGUUGAGUUGAGUUGAGUUGGC	UUCAUUUCAACUCUAUUCCAUUCA	Translation	(-)
ath-miR5653	AT2G47020	Chr2:19319811-19319994	5	-1	UGGGUUGAGUUGAGUUGAGUUGGC	UAAUGUUUUAGUAAACUCAAUCCA	Cleavage	(-)
ath-miR5654-3p	AT5G53480	Chr5:21716752-21717881	5	-1	UGGAAGAUGCUUUGGGAUUUAUU	UAUUAGUCCCAAACCAUGUUUCU	Translation	(+)
ath-miR5654-3p	AT4G30550	Chr4:14926790-14926927	5	-1	UGGAAGAUGCUUUGGGAUUUAUU	UCACAAUCACAAAUAAUCUUUUA	Translation	(+)
ath-miR5654-3p	AT1G53380	Chr1:19913116-19913255	5	-1	UGGAAGAUGCUUUGGGAUUUAUU	AGAGAACACAGAGGCAUCUUUUA	Cleavage	(-)
ath-miR5654-5p	AT2G39370	Chr2:16444027-16444131	5	-1	AUAAAUCCCAACAUCUUCCA	UCAAAUAUGUUCGGAUUUGU	Cleavage	(-)
ath-miR5655	AT5G28530	Chr5:10524758-10525041	5	-1	AAGUAGACACAUAAGAAGGAG	UUUUUUCUUGGGUUUCUAUUU	Translation	(-)
ath-miR5655	AT5G64050	Chr5:25629872-25629981	5	-1	AAGUAGACACAUAAGAAGGAG	CAUUUUCUUCUUUGUCUGUUU	Translation	(-)
ath-miR5655	AT4G34870	Chr4:16615149-16615268	5	-1	AAGUAGACACAUAAGAAGGAG	UGCUUCUUUGUGUUUUUGCUU	Cleavage	(+)
ath-miR5655	AT4G12650	Chr4:7467977-7468047	5	-1	AAGUAGACACAUAAGAAGGAG	CGCCUCAUUAUGUUUUUGUUU	Cleavage	(-)
ath-miR5655	AT1G16080	Chr1:5515859-5516036	5	-1	AAGUAGACACAUAAGAAGGAG	GACUUUUAUAUGUGUAAACUU	Cleavage	(+)
ath-miR5657	AT1G07510	Chr1:2309455-2309543	5	-1	UGGACAAGGUUAGAUUUGGUG	UAUAAAAUCUAUCUUUUUCCA	Translation	(+)
ath-miR5657	AT1G49410	Chr1:18285431-18285567	5	-1	UGGACAAGGUUAGAUUUGGUG	UCUCAGAACUAGUUUUGUCUU	Cleavage	(-)
ath-miR5657	AT4G32410	Chr4:15640651-15640954	5	-1	UGGACAAGGUUAGAUUUGGUG	GUCCAAGAUUAGCUUUCUCCG	Cleavage	(-)
ath-miR5658	AT1G10480	Chr1:3450545-3450766	5	-1	AUGAUGAUGAUGAUGAUGAAA	CUCGAUCAUCAUCGUCAUCCG	Cleavage	(+)
ath-miR5658	AT1G06290	Chr1:1926123-1926210	5	-1	AUGAUGAUGAUGAUGAUGAAA	UCUUAUAAUAAUUGUUAUUAU	Cleavage	(+)
ath-miR5661	AT2G41180	Chr2:17165885-17166142	5	-1	AGAGGUACAUCAUGUAGUCUG	UAGA-UGUAUGAUGUAUCCCU	Cleavage	(+)
ath-miR5663-5p	AT4G02630	Chr4:1153231-1153357	5	-1	AGCUAAGGAUUUGCAUUCUCA	UAUGUGUGUAGAUUCUUAGCC	Cleavage	(+)
ath-miR5665	AT5G55250	Chr5:22407445-22407580	5	-1	UUGGUGGACAAGAUCUGGGAU	UUCCUUUAUCUUGUUUAUCAU	Cleavage	(-)
ath-miR5995b	AT5G40920	Chr5:16400671-16404239	5	-1	ACAUAUGAUCUGCAUCUUUGC	AUGAAAGUGUUGAUUAUGUGU	Translation	(+)
ath-miR5996	AT3G61750	Chr3:22857609-22857810	5	-1	UGACAUCCAGAUAGAAGCUUUG	GUUUGUUUCUUUUUGGAUCUCA	Cleavage	(-)
ath-miR5997	AT1G55890	Chr1:20902718-20902803	5	-1	UGAAACCAAGUAGCUAAAUAG	AAUUUUGGUUAUUUGUUUUCU	Cleavage	(+)
ath-miR5998a	AT1G14685	Chr1:5044077-5044354	5	-1	ACAGUUUGUGUUUUGUUUUGU	ACUAACCAAAACAAAAAAUGU	Cleavage	(+)
ath-miR5998a	AT1G18660	Chr1:6425717-6425856	5	-1	ACA-GUUUGUGUUUUGUUUUGU	AAAAAACAAAACAAAAAUAUGU	Cleavage	(+)
ath-miR5998a	AT2G36320	Chr2:15230002-15230435	5	-1	ACAGUUUGUGUUUUGUUUUGU	GGAAAAUGGAAUAUAAGUUUU	Cleavage	(+)
ath-miR5998a	AT2G46020	Chr2:18931951-18932053	5	-1	ACAGUUUGUGUUUUGUUUUGU	GUAUAAAAAAACAAAAAUUGG	Cleavage	(+)
ath-miR5998a	AT4G00730	Chr4:299317-299661	5	-1	ACAGUUUGUGUUUUGUUUUGU	UGGUUAGAAAACGCGAACUGU	Cleavage	(-)
ath-miR5998a	AT2G44520	Chr2:18381803-18381922	5	-1	ACAGUUUGUGUUUUGUUUUGU	AUGAUACAAAAUACAUACUUU	Cleavage	(+)
ath-miR5998a	AT3G10230	Chr3:3164080-3164171	5	-1	ACAGUUUGUGUUUUGUUUUGU	CCAAAACUAGAGGCAAAAUGU	Translation	(-)
ath-miR5998a	AT3G52590	Chr3:19506813-19507004	5	-1	ACAGUUUGUGUUUUGUUUUGU	GAUAAACUAUGUACAAAUUGU	Cleavage	(+)
ath-miR5998a	AT1G08610	Chr1:2733616-2733674	5	-1	ACAGUUUGUGUUUUGUUUUGU	UUAAAACAACAAACAAGUUGA	Translation	(-)
ath-miR5998a	AT1G66660	Chr1:24861928-24862036	5	-1	ACAGUUUGUGUUUUGUUUUGU	UAGAGAUAAAAUGUUAAUUGU	Cleavage	(-)
ath-miR5998a	AT3G26960	Chr3:9944665-9944772	5	-1	ACAGUUUGUGUUUUGUUUUGU	UAAAAACAAAAUUUGAAUUUU	Cleavage	(-)
ath-miR5998a	AT3G22120	Chr3:7795046-7795180	5	-1	ACAGUUUGUGUUUUGUUUUGU	AGAAGAAGAAAAAAAAACUGU	Translation	(-)
ath-miR5998a	AT5G44050	Chr5:17726350-17726442	5	-1	ACAGUUUGUGUUUUGUUUUGU	CGAAAUCAGAACACUGGCUGC	Cleavage	(+)
ath-miR5998a	AT3G60850	Chr3:22484143-22484216	5	-1	ACAGUUUGUGUUUUGUUUUGU	GUAAAUUCAAACUCAGAUUGU	Cleavage	(+)
ath-miR5998b	AT1G14685	Chr1:5044077-5044354	5	-1	ACAGUUUGUGUUUUGUUUUGU	ACUAACCAAAACAAAAAAUGU	Cleavage	(+)
ath-miR5998b	AT1G18660	Chr1:6425717-6425856	5	-1	ACA-GUUUGUGUUUUGUUUUGU	AAAAAACAAAACAAAAAUAUGU	Cleavage	(+)
ath-miR5998b	AT2G36320	Chr2:15230002-15230435	5	-1	ACAGUUUGUGUUUUGUUUUGU	GGAAAAUGGAAUAUAAGUUUU	Cleavage	(+)
ath-miR5998b	AT2G46020	Chr2:18931951-18932053	5	-1	ACAGUUUGUGUUUUGUUUUGU	GUAUAAAAAAACAAAAAUUGG	Cleavage	(+)
ath-miR5998b	AT4G00730	Chr4:299317-299661	5	-1	ACAGUUUGUGUUUUGUUUUGU	UGGUUAGAAAACGCGAACUGU	Cleavage	(-)
ath-miR5998b	AT2G44520	Chr2:18381803-18381922	5	-1	ACAGUUUGUGUUUUGUUUUGU	AUGAUACAAAAUACAUACUUU	Cleavage	(+)
ath-miR5998b	AT3G10230	Chr3:3164080-3164171	5	-1	ACAGUUUGUGUUUUGUUUUGU	CCAAAACUAGAGGCAAAAUGU	Translation	(-)
ath-miR5998b	AT3G52590	Chr3:19506813-19507004	5	-1	ACAGUUUGUGUUUUGUUUUGU	GAUAAACUAUGUACAAAUUGU	Cleavage	(+)
ath-miR5998b	AT1G08610	Chr1:2733616-2733674	5	-1	ACAGUUUGUGUUUUGUUUUGU	UUAAAACAACAAACAAGUUGA	Translation	(-)
ath-miR5998b	AT1G66660	Chr1:24861928-24862036	5	-1	ACAGUUUGUGUUUUGUUUUGU	UAGAGAUAAAAUGUUAAUUGU	Cleavage	(-)
ath-miR5998b	AT3G26960	Chr3:9944665-9944772	5	-1	ACAGUUUGUGUUUUGUUUUGU	UAAAAACAAAAUUUGAAUUUU	Cleavage	(-)
ath-miR5998b	AT3G22120	Chr3:7795046-7795180	5	-1	ACAGUUUGUGUUUUGUUUUGU	AGAAGAAGAAAAAAAAACUGU	Translation	(-)
ath-miR5998b	AT5G44050	Chr5:17726350-17726442	5	-1	ACAGUUUGUGUUUUGUUUUGU	CGAAAUCAGAACACUGGCUGC	Cleavage	(+)
ath-miR5998b	AT3G60850	Chr3:22484143-22484216	5	-1	ACAGUUUGUGUUUUGUUUUGU	GUAAAUUCAAACUCAGAUUGU	Cleavage	(+)
ath-miR774a	AT5G11700	Chr5:3762519-3762870	5	-1	UUGGUUACCCAUAUGGCCAUC	UAUGGUCGUGUUGGUGACUGG	Translation	(-)
ath-miR774b-3p	AT1G45230	Chr1:17169548-17169859	5	-1	CAUCCAUAUUUUCAUCUCGAA	UUUGAGUUGGAAAUACGAAUG	Cleavage	(-)
ath-miR774b-3p	AT4G25830	Chr4:13134872-13134990	5	-1	CAUCCAUAUUUUCAUCUCGAA	CUUGAGAAAAAAAUAUAGGUG	Cleavage	(+)
ath-miR774b-3p	AT2G25450	Chr2:10829990-10830211	5	-1	CAUCCAUAUUUUCAUCUCGAA	AACCAGA-GAGAGUAUGGAUC	Cleavage	(-)
ath-miR774b-5p	AT3G24120	Chr3:8705637-8705910	5	-1	UGAGAUGAAGAUAUGGGUGAU	GUCAUC-ACAUUUUCAUCUUA	Cleavage	(-)
ath-miR776	AT5G46410	Chr5:18828179-18829313	5	-1	UCUAAGUCUUCUAUUGAUGUU	UUUUUUAAUAGAAGACCUAGU	Cleavage	(+)
ath-miR776	AT3G54000	Chr3:19998292-19998624	5	-1	UCUAAGUCUUCUAUUGAUGUU	AGAGAUAGUGGAAGAUUUGGA	Cleavage	(+)
ath-miR776	AT4G13010	Chr4:7602680-7602730	5	-1	UCUAAGUCUUCUAUUGAUGUU	UACAUGAAAAGAAAAUUUGGA	Cleavage	(+)
ath-miR778	AT1G64060	Chr1:23776409-23776932	5	-1	UGGCUUGGUUUAUGUACACCG	AGGUUUAUAUACACCGAGGCA	Translation	(+)
ath-miR779.2	AT1G56210	Chr1:21037108-21037209	5	-1	UGAUUGGAAAUUUCGUUGACU	GCUUAAUGGUGUUUCUAGUUA	Cleavage	(+)
ath-miR779.2	AT2G34340	Chr2:14488762-14488892	5	-1	UGAUUGGAAAUUUCGUUGACU	AAACAAGGAAAUUUCGGGUUA	Cleavage	(-)
ath-miR779.2	AT5G24830	Chr5:8533613-8533832	5	-1	UGAUUGGAAAUUUCGUUGACU	GUACAACAAGAUGUUUAAUCA	Cleavage	(+)
ath-miR779.2	AT3G15220	Chr3:5126597-5126754	5	-1	UGAUUGGAAAUUUCGUUGACU	UUUAAGAGGAAUUUCUAUUCA	Cleavage	(-)
ath-miR781a	AT4G00290	Chr4:122835-122965	5	-1	UUAGAGUUUUCUGGAUACUUA	UAGGUAUUUAUAGGGUUCUAA	Translation	(-)
ath-miR781a	AT5G64600	Chr5:25828005-25828106	5	-1	UUAGAGUUUUCUGGAUACUUA	UUGAUAUCCGGAGAUCUCUAG	Cleavage	(+)
ath-miR781b	AT4G00290	Chr4:122835-122965	5	-1	UUAGAGUUUUCUGGAUACUUA	UAGGUAUUUAUAGGGUUCUAA	Translation	(-)
ath-miR781b	AT5G64600	Chr5:25828005-25828106	5	-1	UUAGAGUUUUCUGGAUACUUA	UUGAUAUCCGGAGAUCUCUAG	Cleavage	(+)
ath-miR8121	AT4G16850	Chr4:9481710-9481812	5	-1	AAAGUAUAAUGGUUUAGUGGUUUG	CAAAAGACAAGACUGUUAUAUUUA	Cleavage	(+)
ath-miR8121	AT3G07525	Chr3:2399031-2399176	5	-1	AAAGUAUAAUGGUUUAGUGGUUUG	UUUUCCAACAAACCAUUUUGCUUA	Cleavage	(-)
ath-miR8121	AT5G48620	Chr5:19721040-19721358	5	-1	AAAGUAUAAUGGUUUAGUGGUUUG	GCUUUCAGUGAAUCGUUAUGUUGU	Cleavage	(+)
ath-miR8166	AT1G63690	Chr1:23622269-23622394	5	-1	AGAGAGUGUAGAAAGUU-UCUCA	GUAGACAACUUUCUAAGCUCUCA	Cleavage	(+)
ath-miR8166	AT1G30820	Chr1:10944910-10945143	5	-1	AGAGAGUGUAGAAAGUUUCUCA	GUUGGAACAUUUUACA-UCUCU	Cleavage	(-)
ath-miR8167a	AT1G33250	Chr1:12057249-12057391	5	-1	AGAUGUGGAGAUCGUGGGGAUG	AGAUUUCACGAACUCAACAUUU	Translation	(-)
ath-miR8167b	AT1G33250	Chr1:12057249-12057391	5	-1	AGAUGUGGAGAUCGUGGGGAUG	AGAUUUCACGAACUCAACAUUU	Translation	(-)
ath-miR8167c	AT1G33250	Chr1:12057249-12057391	5	-1	AGAUGUGGAGAUCGUGGGGAUG	AGAUUUCACGAACUCAACAUUU	Translation	(-)
ath-miR8167d	AT1G33250	Chr1:12057249-12057391	5	-1	AGAUGUGGAGAUCGUGGGGAUG	AGAUUUCACGAACUCAACAUUU	Translation	(-)
ath-miR8167e	AT1G33250	Chr1:12057249-12057391	5	-1	AGAUGUGGAGAUCGUGGGGAUG	AGAUUUCACGAACUCAACAUUU	Translation	(-)
ath-miR8167f	AT1G33250	Chr1:12057249-12057391	5	-1	AGAUGUGGAGAUCGUGGGGAUG	AGAUUUCACGAACUCAACAUUU	Translation	(-)
ath-miR8170-3p	AT5G39740	Chr5:15905351-15905529	5	-1	UUGCUUAAAGAUUUUCUAUGU	AAAUGGGGAUUCUUGAAGUAA	Cleavage	(+)
ath-miR8170-3p	AT1G33680	Chr1:12208524-12208698	5	-1	UUGCUUAAAGAUUUUCUAUGU	UUACAGAAAAUCUU-AAGCAU	Cleavage	(+)
ath-miR8170-3p	AT4G00360	Chr4:162841-162941	5	-1	UUGCUUAAAGAUUUUCUAUGU	CUAUGUAAACUUUGUAAGCAA	Cleavage	(+)
ath-miR8170-5p	AT1G22280	Chr1:7875650-7875946	5	-1	AUAGCAAAUCGAUAAGCAAUG	UAUAAUUGGUUGAUUUGUUAU	Cleavage	(+)
ath-miR8172	AT2G32590	Chr2:13829189-13829264	5	-1	AUGGAUCAUCUAGAUGGAGAU	CAUUCCAUCUGAUUGAUUUAU	Translation	(-)
ath-miR8173	AT2G38300	Chr2:16043966-16044038	5	-1	AUGUGCUGAUUCGAGGUGGGA	CGCCAAUUUGUAUCAUCACAU	Translation	(-)
ath-miR8174	AT4G38600	Chr4:18040964-18041246	5	-1	AUGUGUAUAGGGAAGCUAAUC	UCUUAGAUUCCCUCUAUGUAA	Cleavage	(-)
ath-miR8174	AT2G01710	Chr2:316989-317064	5	-1	AUGUGUAUAGGGAAGCUAAUC	CUUUAGAUUCUCUGUAAAUAA	Cleavage	(+)
ath-miR8174	AT5G10280	Chr5:3234020-3234278	5	-1	AUGUGUAUAGGGAAGCUAAUC	UAUUUGCCUAUCUAUAUAUAU	Cleavage	(+)
ath-miR8174	AT1G11290	Chr1:3791145-3791234	5	-1	AUGUGUAUAGGGAAGCUAAUC	CCUUUCUUUCCCAGUACAUAU	Cleavage	(-)
ath-miR8177	AT1G08200	Chr1:2573954-2574175	5	-1	GUGUGAUGAUGUGUCAUUUAUA	AACAAAUGAUAUAUCAUGGUGG	Cleavage	(-)
ath-miR8178	AT2G39870	Chr2:16645125-16645496	5	-1	UAACAGAGUAAUUGUACAGUG	CUCUCUGUAAUUUUUUUGUUG	Cleavage	(+)
ath-miR8180	AT3G23610	Chr3:8479776-8479851	5	-1	UGCGGUGCGGGAGAAGUGC	GUAAAUUUUUUGUACCGCA	Cleavage	(+)
ath-miR8181	AT5G09460	Chr5:2943711-2944339	5	-1	UGGGGGUGGGGGGGUGACAG	UUGAAAUCUUCCCACUUUCA	Cleavage	(-)
ath-miR8182	AT4G34890	Chr4:16618576-16618723	5	-1	UUGUGUUGCGUUUCUGUUGAUU	UCUCCAUAUAAAUGUAACAUAU	Cleavage	(-)
ath-miR8182	AT5G36170	Chr5:14235897-14235986	5	-1	UUGUGUUGCGUUUCUGUUGAUU	UUUAAACA-AAACGAAACAUAA	Cleavage	(-)
ath-miR8183	AT3G27320	Chr3:10092522-10092768	5	-1	UUUAGUUGACGGAAUUGUGGC	UCUAUUAAUCCGUCGACCAAA	Cleavage	(+)
ath-miR8183	AT5G23280	Chr5:7843897-7844345	5	-1	UUUAGUUGACGGAAUUGUGGC	GAAACAGAGCCGUCGAUUAAA	Cleavage	(+)
ath-miR825	AT2G24420	Chr2:10383263-10383404	5	-1	UUCUCAAGAAGGUGCAUGAAC	UGUCUUUUAUCUUUUUGAAAA	Cleavage	(+)
ath-miR826b	AT2G01930	Chr2:427101-427258	5	-1	UGGUUUUGGACACGUGAAAAU	UGUUUUGUUUGUUUGAAACUA	Cleavage	(-)
ath-miR828	AT5G02770	Chr5:627089-627884	5	-1	UCUUGCUUAAAUGAGUAUUCCA	UGCAGCAAAUAUUUAAGUAAGG	Cleavage	(-)
ath-miR829-3p.2	AT1G54450	Chr1:20336294-20336389	5	-1	CAAAUUAAAGCUUCAAGGUAG	CAGUUUUGAA-CUUUGAUUUG	Translation	(-)
ath-miR829-3p.2	AT4G10170	Chr4:6345394-6345592	5	-1	CAAAUUAAAGCUUCAAGGUAG	GCAUUCUUAAGUUAUAAUUUG	Cleavage	(+)
ath-miR829-5p	AT1G06950	Chr1:2130040-2130159	5	-1	ACUUUGAAGCUUUGAUUUGAA	UUUAGAGCGCAGCUUUGAAGU	Cleavage	(-)
ath-miR829-5p	AT1G33420	Chr1:12120885-12121019	5	-1	ACUUUGAAGCUUUGAUUUGAA	UUCAAUCCUAAGCUUAAAAGU	Cleavage	(-)
ath-miR829-5p	AT5G40920	Chr5:16400671-16404239	5	-1	ACUUUGAAGCUUUGAUUUGAA	UCUAAAUCGAUGCUUCAACGG	Translation	(+)
ath-miR829-5p	AT5G40890	Chr5:16381400-16381488	5	-1	ACUUUGAAGCUUUGAUUUGAA	UACAGAACAAAACUUUGAAGC	Translation	(-)
ath-miR829-5p	AT1G11290	Chr1:3791145-3791234	5	-1	ACUUUGAAGCUUUGAUUUGAA	UACAUAUGAAAGCUGAAAAGU	Cleavage	(-)
ath-miR830-3p	AT1G49410	Chr1:18285431-18285567	5	-1	UAACUA-UUUUGAGAAGAAGUG	AUUUUCUUCUCAGAACUAGUUU	Cleavage	(-)
ath-miR830-3p	AT5G55850	Chr5:22605042-22605295	5	-1	UAACUAUUUUGAGAAGAAGUG	UUCUUCUUCUUAAAAUGCUGU	Cleavage	(+)
ath-miR830-3p	AT1G33680	Chr1:12208524-12208698	5	-1	UAACUAUUUUGAGAAGAAGUG	UUUUUUUUUUCAGUAGAGUUA	Cleavage	(+)
ath-miR830-5p	AT3G17940	Chr3:6143549-6143645	5	-1	UCUUCUCCAAAUAGUUUAGGUU	AAUUUUAUCUCUUUGGGGGAGA	Cleavage	(-)
ath-miR831-3p	AT3G26922	Chr3:9923980-9924670	5	-1	UGAUCUCUUCGUACUCUUCUUG	AGAGAAAUCUAUGAAGAGAACA	Cleavage	(+)
ath-miR831-5p	AT4G38600	Chr4:18040964-18041246	5	-1	AGAAGCGUACAAGGAGAUGAGG	UUUCUUCUUCUUCUUCGUUUCU	Translation	(-)
ath-miR831-5p	AT1G04760	Chr1:1336138-1336244	5	-1	AGAAGCGUACAAGGAGAUG	UAUCCCCUUUUAUCCUUCU	Translation	(+)
ath-miR831-5p	AT1G68490	Chr1:25695001-25695553	5	-1	AGAAGCGUACAAGGAGAUGAGG	UCAGAUUUCUUUGUAUGGUUCA	Cleavage	(+)
ath-miR833a-3p	AT3G22330	Chr3:7895347-7895464	5	-1	UAGACCGAUGUCAACAAACAAG	UUUGUUUGUUUAUAUUGUUUUG	Cleavage	(+)
ath-miR833a-5p	AT1G10585	Chr1:3493839-3494028	5	-1	UGUUUGUUGUACUCGGUCUAG	UGAGUUCGAUUAUGAUAAAUA	Cleavage	(-)
ath-miR833b	AT3G51240	Chr3:19026795-19026963	5	-1	UGUUUGUUGACAUCGGUCUAG	UUGGGUUUAUGUCAAAAAGCA	Cleavage	(+)
ath-miR833b	AT5G59740	Chr5:24070047-24070127	5	-1	UGUUUGUUGACAUCGGUCUAG	AAAGAUUGAUGACAAUGAAAA	Translation	(-)
ath-miR833b	AT5G40920	Chr5:16400671-16404239	5	-1	UGUUUGUUGACAUCGGUCUAG	GAACAUUGAUGUUAAUAACUA	Cleavage	(+)
ath-miR834	AT3G04760	Chr3:1303583-1303842	5	-1	UGGUAGCAGUAGCGGUGGUAA	CCAUAGCUGCAACUGCUACCU	Translation	(-)
ath-miR835-3p	AT4G18670	Chr4:10275499-10275725	5	-1	UGGAGAAGAUACGCAAGAAAG	AUUUUUUGUGUUUUUUCUUUC	Translation	(-)
ath-miR835-3p	AT5G57130	Chr5:23149411-23149633	5	-1	UGGAGAAGAUACGCAAGAAAG	AUUUCUUUUGUUUCUUUUUCU	Translation	(+)
ath-miR835-3p	AT3G49900	Chr3:18500520-18500576	5	-1	UGGAGAAGAUACGCAAGAAAG	UGAUUCUGUGUUUCUUCUUCA	Translation	(-)
ath-miR835-3p	AT1G50790	Chr1:18823840-18823940	5	-1	UGGAGAAGAUACGCAAGAAAG	GUUUCAUUUGUAUCUUUUUGA	Cleavage	(-)
ath-miR835-3p	AT5G25280	Chr5:8774794-8775566	5	-1	UGGAGAAGAUACGCAAGAAAG	UUUUUUGGUUUGUCUUUUUCA	Cleavage	(+)
ath-miR835-3p	AT1G80180	Chr1:30156858-30157016	5	-1	UGGAGAAGAUACGCAAGAAAG	GCUUCUUAUGAAUCUUUUUCU	Translation	(-)
ath-miR835-3p	AT5G47560	Chr5:19287387-19287779	5	-1	UGGAGAAGAUACGCAAGAAAG	UUGUCCAGCGUGUCUUCUUCU	Cleavage	(-)
ath-miR835-5p	AT2G33255	Chr2:14100465-14100578	5	-1	UUCUUGCAUAUGUUCUUUAUC	UCUAGCGAACAUGUGUGUGAG	Cleavage	(+)
ath-miR837-3p	AT1G50370	Chr1:18661789-18661885	5	-1	AAACGAACAAAAAACUGAUGG	CCAUUGUUUUUUUUUUCCUUU	Cleavage	(+)
ath-miR837-3p	AT4G05160	Chr4:2666691-2666744	5	-1	AAACGAACAAAAAACUGAUGG	ACAUAAGUUUUUUAAUCGUUC	Cleavage	(+)
ath-miR837-3p	AT1G03020	Chr1:697917-698093	5	-1	AAACGAACAAAAAACUGAUGG	UCAUCAGUUUUU-GUUUAUUU	Cleavage	(-)
ath-miR837-3p	AT5G59740	Chr5:24070047-24070127	5	-1	AAACGAACAAAAAACUGAUGG	ACAUGUGUUUCUUGUUUGUUA	Translation	(-)
ath-miR837-3p	AT1G01580	Chr1:212894-213078	5	-1	AAACGAACAAAAAACUGAUGG	AUAUCCUUUUUUUGUUUGUAA	Cleavage	(+)
ath-miR837-3p	AT2G31230	Chr2:13306516-13306599	5	-1	AAACGAACAAAAAACUGAUGG	CUCUUA-UUUUUUGUUUGUUG	Cleavage	(-)
ath-miR837-3p	AT3G04590	Chr3:1238888-1239207	5	-1	AAACGAACAAAAAACUGAUGG	UUUUUGGUUUUUCUUUCGUUU	Cleavage	(-)
ath-miR837-3p	AT1G32760	Chr1:11859320-11859383	5	-1	AAACGAACAAAAAACUGAUGG	AGAUACGUUCUUUGUUUGUUG	Cleavage	(+)
ath-miR837-3p	AT1G10480	Chr1:3450545-3450766	5	-1	AAACGAACAAAAAACUGAUGG	AAAUCAUUUUCUUGUUCCUUA	Translation	(+)
ath-miR837-3p	AT4G00830	Chr4:354967-355213	5	-1	AAACGAACAAAAAACUGAUGG	GGAUUUGUUUGUAGUUUGUUU	Translation	(+)
ath-miR837-3p	AT5G25070	Chr5:8640878-8641151	5	-1	AAACGAACAAAAAACUGAUGG	GUAUAUGGUUUUUGUUUGGUU	Cleavage	(-)
ath-miR837-3p	AT4G27840	Chr4:13865058-13865255	5	-1	AAACGAACAAAAAACUGAUGG	UGAUGAUGUUUUUGUUUGUGU	Cleavage	(-)
ath-miR837-5p	AT5G55810	Chr5:22583985-22584073	5	-1	AUCAGUUUCUUGUUCGUUUCA	CGAGAGAAAUGUGAAACUGAU	Translation	(-)
ath-miR837-5p	AT5G40770	Chr5:16315028-16315405	5	-1	AUCAGUUUCUUGUUCGUUUCA	GAAGAAGAAAAAGAAACUAGU	Cleavage	(-)
ath-miR837-5p	AT3G07990	Chr3:2554722-2554924	5	-1	AUCAGUUUCUUGUUCGUUUCA	CAAAUUCAACAGAAGACUGAU	Cleavage	(+)
ath-miR837-5p	AT3G52640	Chr3:19514874-19514934	5	-1	AUCAGUUUCUUGUUCGUUUCA	UUACACUGGCAAGAAAUUUAU	Cleavage	(-)
ath-miR838	AT5G08060	Chr5:2582368-2582626	5	-1	UUUUCUUCUACUUCUUGCACA	UGACUAAGAAGAAGGAGAAGA	Translation	(+)
ath-miR838	AT3G54000	Chr3:19998292-19998624	5	-1	UUUUCUUCUACUUCUUGCACA	AGUGGAAGAUUUGGAAGAAGA	Translation	(+)
ath-miR838	AT3G63440	Chr3:23426378-23426449	5	-1	UUUUCUUCUACUUCUUGCACA	AGAUGAAGAAGAAGAAGAAAG	Translation	(+)
ath-miR838	AT2G22360	Chr2:9500521-9500719	5	-1	UUUUCUUCUACUUCUUGCACA	GAAGAAGCAAGUGGAGGAAGA	Cleavage	(+)
ath-miR838	AT5G58030	Chr5:23486751-23486824	5	-1	UUUUCUUCUACUUCUUGCACA	AUUGCAA-AAGGAAAAGAAAA	Translation	(-)
ath-miR840-3p	AT1G29810	Chr1:10435288-10435411	5	-1	UUGUUUAGGUCCCUUAGUUUC	AAAAUCAGGGGAUUUAAGUAU	Cleavage	(-)
ath-miR840-3p	AT1G70900	Chr1:26733669-26733833	5	-1	UUGUUUAGGUCCCUUAGUUUC	CAAUGUAAGGAACCGAAACAA	Translation	(+)
ath-miR840-5p	AT1G74340	Chr1:27948122-27948262	5	-1	ACACUGAAGGACCUAAACUAAC	CAUUGUUUUGGUCUUUCAGAGG	Cleavage	(-)
ath-miR841a-3p	AT4G14400	Chr4:8298382-8298552	5	-1	AUUUCUAGUGGGUCGUAUUCA	AUCAUACAACUCAUUCGAAGU	Cleavage	(+)
ath-miR841a-3p	AT3G19515	Chr3:6766656-6766769	5	-1	AUUUCUAGUGGGUCGUAUUCA	UAAGUA-GACCCAUUAAGAAU	Cleavage	(-)
ath-miR844-3p	AT3G07990	Chr3:2554722-2554924	5	-1	UUAUAAGCCAUCUUACUAGUU	UACUA-UAAGAUAGUUUAUAU	Cleavage	(+)
ath-miR844-5p	AT1G19600	Chr1:6781067-6781174	5	-1	UGGUAAGAUUGCUUAUAAGCU	GGUUUAGGAUCAAUCUUACUU	Cleavage	(+)
ath-miR844-5p	AT3G16500	Chr3:5612407-5612700	5	-1	UGGUAAGAUUGCUUAUAAGCU	UGUUUAUAAGCAUUUUAAUUA	Cleavage	(-)
ath-miR844-5p	AT4G35310	Chr4:16804722-16804975	5	-1	UGGUAAGAUUGCUUAUAAGCU	GAUUUCUAAGCAUUUUUACUU	Cleavage	(+)
ath-miR845b	AT1G60170	Chr1:22195220-22195370	5	-1	UCGCUCUGAUACCAAAUUGAUG	UUUUAUUUUUGUAUUAGAGCCA	Cleavage	(+)
ath-miR846-3p	AT1G23490	Chr1:8338581-8338778	5	-1	UUGAAUUGAAGUGCUUGAAUU	UACUUGUGCACUUUGAUUCAU	Cleavage	(+)
ath-miR846-3p	AT3G16500	Chr3:5612407-5612700	5	-1	UUGAAUUGAAGUGCUUGAAUU	UUUAUAAGCAUUUUAAUUAAU	Cleavage	(-)
ath-miR846-5p	AT5G40920	Chr5:16400671-16404239	5	-1	CAUUCAAGGACUUCUAUUCAG	AAGGAAACGAGUCUUUGAAGG	Cleavage	(+)
ath-miR847	AT3G22420	Chr3:7949044-7949097	5	-1	UCACUCCUCUUCUUCUUGAUG	AUUUAAAGAGAAGAAGAGUAA	Cleavage	(+)
ath-miR851-3p	AT1G05380	Chr1:1582383-1582610	5	-1	UGGGUGGCAAACAAAGACGAC	CCUGUAUUUAUUUUUCACCCA	Cleavage	(+)
ath-miR852	AT3G26920	Chr3:9922517-9922570	5	-1	AAGAUAAGCGCCUUAGUUCUG	UUAAGCUAAGGCGUUUUUUUG	Cleavage	(+)
ath-miR852	AT5G45130	Chr5:18246235-18246319	5	-1	AAGAUAAGCGCCUUAGUUCUG	CGAAAAAAAUGUGCUUAUCUU	Cleavage	(+)
ath-miR854a	AT3G10650	Chr3:3325235-3325427	5	-1	GAUGAGGAUAGGGAGGAGGAG	CUUUUUCUUUUUGUCCUUAUA	Cleavage	(-)
ath-miR854a	AT4G04350	Chr4:2133087-2133229	5	-1	GAUGAGGAUAGGGAGGAGGAG	UUCCUUCUUUCCAUCCUCCUU	Translation	(+)
ath-miR854a	AT2G41230	Chr2:17195014-17195127	5	-1	GAUGAGGAUAGGGAGGAGGAG	UUCGUUUUUUCUAUUCUUGUU	Cleavage	(-)
ath-miR854a	AT1G01580	Chr1:212894-213078	5	-1	GAUGAGGAUAGGGAGGAGGAG	UUGUUUUUCUUUAUCCUCUUC	Cleavage	(+)
ath-miR854a	AT1G72750	Chr1:27384206-27384382	5	-1	GAUGAGGAUAGGGAGGAGGAG	AACCUUUUUCUUAUAUUCAUA	Cleavage	(+)
ath-miR854b	AT3G10650	Chr3:3325235-3325427	5	-1	GAUGAGGAUAGGGAGGAGGAG	CUUUUUCUUUUUGUCCUUAUA	Cleavage	(-)
ath-miR854b	AT4G04350	Chr4:2133087-2133229	5	-1	GAUGAGGAUAGGGAGGAGGAG	UUCCUUCUUUCCAUCCUCCUU	Translation	(+)
ath-miR854b	AT2G41230	Chr2:17195014-17195127	5	-1	GAUGAGGAUAGGGAGGAGGAG	UUCGUUUUUUCUAUUCUUGUU	Cleavage	(-)
ath-miR854b	AT1G01580	Chr1:212894-213078	5	-1	GAUGAGGAUAGGGAGGAGGAG	UUGUUUUUCUUUAUCCUCUUC	Cleavage	(+)
ath-miR854b	AT1G72750	Chr1:27384206-27384382	5	-1	GAUGAGGAUAGGGAGGAGGAG	AACCUUUUUCUUAUAUUCAUA	Cleavage	(+)
ath-miR854c	AT3G10650	Chr3:3325235-3325427	5	-1	GAUGAGGAUAGGGAGGAGGAG	CUUUUUCUUUUUGUCCUUAUA	Cleavage	(-)
ath-miR854c	AT4G04350	Chr4:2133087-2133229	5	-1	GAUGAGGAUAGGGAGGAGGAG	UUCCUUCUUUCCAUCCUCCUU	Translation	(+)
ath-miR854c	AT2G41230	Chr2:17195014-17195127	5	-1	GAUGAGGAUAGGGAGGAGGAG	UUCGUUUUUUCUAUUCUUGUU	Cleavage	(-)
ath-miR854c	AT1G01580	Chr1:212894-213078	5	-1	GAUGAGGAUAGGGAGGAGGAG	UUGUUUUUCUUUAUCCUCUUC	Cleavage	(+)
ath-miR854c	AT1G72750	Chr1:27384206-27384382	5	-1	GAUGAGGAUAGGGAGGAGGAG	AACCUUUUUCUUAUAUUCAUA	Cleavage	(+)
ath-miR854d	AT3G10650	Chr3:3325235-3325427	5	-1	GAUGAGGAUAGGGAGGAGGAG	CUUUUUCUUUUUGUCCUUAUA	Cleavage	(-)
ath-miR854d	AT4G04350	Chr4:2133087-2133229	5	-1	GAUGAGGAUAGGGAGGAGGAG	UUCCUUCUUUCCAUCCUCCUU	Translation	(+)
ath-miR854d	AT2G41230	Chr2:17195014-17195127	5	-1	GAUGAGGAUAGGGAGGAGGAG	UUCGUUUUUUCUAUUCUUGUU	Cleavage	(-)
ath-miR854d	AT1G01580	Chr1:212894-213078	5	-1	GAUGAGGAUAGGGAGGAGGAG	UUGUUUUUCUUUAUCCUCUUC	Cleavage	(+)
ath-miR854d	AT1G72750	Chr1:27384206-27384382	5	-1	GAUGAGGAUAGGGAGGAGGAG	AACCUUUUUCUUAUAUUCAUA	Cleavage	(+)
ath-miR854e	AT3G10650	Chr3:3325235-3325427	5	-1	GAUGAGGAUAGGGAGGAGGAG	CUUUUUCUUUUUGUCCUUAUA	Cleavage	(-)
ath-miR854e	AT4G04350	Chr4:2133087-2133229	5	-1	GAUGAGGAUAGGGAGGAGGAG	UUCCUUCUUUCCAUCCUCCUU	Translation	(+)
ath-miR854e	AT2G41230	Chr2:17195014-17195127	5	-1	GAUGAGGAUAGGGAGGAGGAG	UUCGUUUUUUCUAUUCUUGUU	Cleavage	(-)
ath-miR854e	AT1G01580	Chr1:212894-213078	5	-1	GAUGAGGAUAGGGAGGAGGAG	UUGUUUUUCUUUAUCCUCUUC	Cleavage	(+)
ath-miR854e	AT1G72750	Chr1:27384206-27384382	5	-1	GAUGAGGAUAGGGAGGAGGAG	AACCUUUUUCUUAUAUUCAUA	Cleavage	(+)
ath-miR855	AT3G54000	Chr3:19998292-19998624	5	-1	AGCAAAAGCUAAGGAAAAGGAA	UUCUUUUUUUUUGGGUUUUUCU	Cleavage	(+)
ath-miR855	AT5G49890	Chr5:20288043-20288234	5	-1	AGCAAAAGCUAAGGAAAAGGAA	UUUUUUUUUUUUGGGUUUUGGU	Cleavage	(-)
ath-miR855	AT1G21390	Chr1:7489081-7489151	5	-1	AGCAAAAGCUAAGGAAAAGGAA	GAUUUUUUUUUUACCUUUAGUU	Cleavage	(-)
ath-miR855	AT5G47560	Chr5:19287387-19287779	5	-1	AGCAAAAGCUAAGGAAAAGGAA	UGCUUUUUAAUUAGUUUUUGUC	Cleavage	(-)
ath-miR855	AT3G04590	Chr3:1238888-1239207	5	-1	AGCAAAAGCUAAGGAAAAGGAA	AAUAUUUUUUUUGGUUUUUCUU	Cleavage	(-)
ath-miR855	AT1G04860	Chr1:1369121-1369254	5	-1	AGCAAAAGCUAAGGAAAAGGAA	CUUCCUUACAAUAGCUUUUGCU	Cleavage	(-)
ath-miR855	AT5G54830	Chr5:22276139-22276246	5	-1	AGCAAAAGCUAAGGAAAAG	CUUUUUUUUUGUUUAUGUU	Translation	(+)
ath-miR855	AT1G14685	Chr1:5044077-5044354	5	-1	AGCAAAAGCUAAGGAAAAGGAA	CACUUUUGCUUUGUUUUUUGUU	Cleavage	(+)
ath-miR855	AT1G30820	Chr1:10944910-10945143	5	-1	AGCAAAAGCUAAGGAAAAGGAA	AAGCUUUUGCUCAGUUUUUUUU	Translation	(-)
ath-miR855	AT5G19820	Chr5:6695227-6695619	5	-1	AGCAAAAGCUAAGGAAAAGGAA	ACACUCUUCUUUGGCCUUUUCU	Cleavage	(-)
ath-miR856	AT5G51150	Chr5:20791574-20791776	5	-1	UAAUCCUACCAAUAACUUCAGC	AUUGAAGUGAUUCAUAGGAUUU	Translation	(+)
ath-miR857	AT3G16500	Chr3:5612407-5612700	5	-1	UUUUGUAUG-UUGAAGGUGUAU	CUAUACCUUUAAUCAUGUAAAA	Cleavage	(-)
ath-miR857	AT2G18162	Chr2:7898292-7898791	5	-1	UUUUGUAUGUUGAAGGUGUAU	CGUCACCGUCGACGAACGAAA	Cleavage	(-)
ath-miR857	AT1G10585	Chr1:3493839-3494028	5	-1	UUUUGUAUGUUGAAGGUGUAU	GUUGACCGUCAACAUAAGAAA	Cleavage	(-)
ath-miR857	AT2G05620	Chr2:2080936-2081088	5	-1	UUUUGUAUGUUGAAGGUGUAU	CCACUCUUUCAACAGAUUAAA	Cleavage	(-)
ath-miR857	AT3G51310	Chr3:19044418-19044499	5	-1	UUUUGUAUGUUGAAGGUGUAU	UUAAAACAGUAACAUACAAAA	Cleavage	(-)
ath-miR858a	AT4G37260	Chr4:17541627-17541690	5	-1	UUUCGUUGUCUGUUCGACCUU	CCAGUAGUAGAGACGACGAAA	Cleavage	(+)
ath-miR858b	AT2G37640	Chr2:15787707-15788059	5	-1	UUCGUUGUCUGUUCGACCUUG	GAGUGUCGAACAGUCAGUGAU	Cleavage	(-)
ath-miR860	AT4G25250	Chr4:12935330-12935416	5	-1	UCAAUAGAUUGGACUAUGUAU	UAAUAUAUUUUAAAUUAUUGG	Cleavage	(+)
ath-miR860	AT4G34890	Chr4:16618576-16618723	5	-1	UCAAUAGAUUGGACUAUGUAU	ACAGAUCGAUCAAUCUAUUGU	Cleavage	(-)
ath-miR861-3p	AT5G64170	Chr5:25672519-25672720	5	-1	GAUGGAUAUGUCUUCAAGGAC	GGUCUUUAAGAUAUGUUCUUU	Cleavage	(-)
ath-miR861-5p	AT3G61750	Chr3:22857609-22857810	5	-1	CCUUGGAGAAAUAUGCGUCAA	GUGAUAUUUGUUUUUUUAAGG	Cleavage	(-)
ath-miR863-3p	AT1G06240	Chr1:1913109-1913263	5	-1	UUGAGAGCAACAAGACAUAAU	UGCUUGUCUUGUUGAUCUUGG	Cleavage	(+)
ath-miR863-3p	AT1G03280	Chr1:806845-807015	5	-1	UUGAGAGCAACAAGACAUAAU	GUUAAGUGUUGUUGUUUAUAA	Cleavage	(+)
ath-miR863-3p	AT2G22510	Chr2:9569025-9569108	5	-1	UUGAGAGCAACAAGACAUAAU	AAACUUUCUUGUUCCUCUUAA	Cleavage	(-)
ath-miR863-3p	AT5G48070	Chr5:19483310-19483511	5	-1	UUGAGAGCAACAAGACAUAAU	AGUAACUUUUGUUAUUCUUAA	Cleavage	(+)
ath-miR863-3p	AT3G14620	Chr3:4916883-4916971	5	-1	UUGAGAGCAACAAGACAUAAU	UGUCUUUUUUGUUUUUCUUAA	Cleavage	(+)
ath-miR863-3p	AT5G50250	Chr5:20452384-20452530	5	-1	UUGAGAGCAACAAGACAUAAU	UCUCUUUGUUGUUGUUGUCAA	Cleavage	(-)
ath-miR863-3p	AT3G10050	Chr3:3098728-3098991	5	-1	UUGAGAGCAACAAGACAUAAU	UCUAU-UAUUAUUGCUCUUAA	Translation	(-)
ath-miR864-3p	AT1G66070	Chr1:24595917-24596056	5	-1	UAAAGUCAAUAAUACCUUGAAG	UAUAAAUUUAUUAUUGACAUUG	Cleavage	(-)
ath-miR865-3p	AT4G27950	Chr4:13909519-13909638	5	-1	UUUUUCCUCAAAUUUAUCCAA	UUGGAGAAAUAUUGGGAAAAG	Translation	(-)
ath-miR865-3p	AT1G32900	Chr1:11920446-11920558	5	-1	UUUUUCCUCAAAUUUAUCCAA	GUAGGGAAGGUUGAGGAAAAG	Cleavage	(-)
ath-miR865-3p	AT5G23280	Chr5:7843897-7844345	5	-1	UUUUUCCUCAAAUUUAUCCAA	CAAGAUUACUUUUAGGAAAAA	Cleavage	(+)
ath-miR866-3p	AT1G50790	Chr1:18823840-18823940	5	-1	ACAAAAUCCGUCUUUGAAGA	AUUUUGAGGACUGGUUUUGG	Cleavage	(-)
ath-miR866-5p	AT3G14350	Chr3:4782765-4783066	5	-1	UCAAGGAACGGAUUUUGUUAA	AAAACAAAAUCCUUUUUUUCU	Cleavage	(-)
ath-miR866-5p	AT3G04130	Chr3:1085881-1086237	5	-1	UCAAGGAACGGAUUUUGUUAA	AAAACAAAAUAUAUUUUUUGG	Translation	(+)
ath-miR866-5p	AT4G04350	Chr4:2133087-2133229	5	-1	UCAAGGAACGGAUUUUGUUAA	AGCAAAAGAUCUGUUCUUAGA	Cleavage	(+)
ath-miR866-5p	AT1G80080	Chr1:30127909-30128004	5	-1	UCAAGGAACGGAUUUUGUUAA	UCUAUAUACUCUGUUCUUUGA	Cleavage	(-)
ath-miR868-5p	AT2G37710	Chr2:15814606-15814760	5	-1	UCAUGUCGUAAUAGUAGUCAC	AAGAAUAUUAUGGCCACAUGA	Translation	(-)
ath-miR869.1	AT4G37180	Chr4:17506140-17506367	5	-1	AUUGGUUCAAUUCUGGUGUUG	AAACAUGAGAGUUGAAAUAAG	Cleavage	(+)
ath-miR870-3p	AT1G68490	Chr1:25695001-25695553	5	-1	UAAUUUGGUGUUUCUUCGAUC	UUUUGAAGAGAUAUUAAAUAU	Cleavage	(+)
ath-miR870-3p	AT1G48230	Chr1:17808701-17808976	5	-1	UAAUUUGGUGUUUCUUCGAUC	AAAAAAAGAAACGCAAAAUUA	Cleavage	(+)
ath-miR870-3p	AT5G12010	Chr5:3877756-3877880	5	-1	UAAUUUGGUGUUUCUUCGAUC	AAUAGAAGAAA-AUUAAAUUA	Translation	(-)
ath-miR870-5p	AT5G49990	Chr5:20337682-20337824	5	-1	AAGAACAUCAAAUUAGAAUGU	AAAUAUUAAUGUGAUGUUUCU	Translation	(-)
ath-miR870-5p	AT3G06130	Chr3:1852892-1853006	5	-1	AAGAACAUCAAAUUAGAAUGU	GAAUCCUAAGUUGGGGUUUUU	Cleavage	(-)
