# Supplementary material for: HDA6-dependent histone deacetylation regulates mRNA polyadenylation in Arabidopsis
Source: HighWire-hosted journal article supplement (doi:10.1101/gr.255232.119), 2020-08-05
Supplement: Supplemental_Table_S4.xlsx [file Supplemental_Table_S4.xlsx]

## Sheet: Supplemental_Table_S4
Supplemental Table S4. Small RNA targeting predictions of 3' UTR shortening genes in hda6
miRNA_Acc	gene	Target_Acc	Expectation	UPE	miRNA_aligned_fragment	Target_aligned_fragment	Inhibition	Target_Desc	Multiplicity
ath-miR5658	AT1G63500	Chr1:23558414-23558898	1	-1	AUGAUGAUGAUGAUGAUGAAA	GUUCAUCAUCAUCAUCAUCAC	Cleavage	(+)	1
ath-miR5017-5p	AT1G68760	Chr1:25829649-25829798	2.5	-1	AUUUGUUACUAAUUUGGAAUG	UUUUCCUAAUUAGUAAUAAAC	Cleavage	(+)	1
ath-miR172d-5p	AT3G45930	Chr3:16883806-16883985	3	-1	GCAACAUCUUCAAGAUUCAGA	CGUGAUUGUUGAAGGUGUUGU	Cleavage	(+)	1
ath-miR2112-3p	AT5G65060	Chr5:25991179-25991370	3	-1	CUUUAUAUCCGCAUUUGCGCA	CGCGCCAAUGUGGAAAUAAAG	Cleavage	(+)	1
ath-miR847	AT5G24930	Chr5:8590973-8591166	3	-1	UCACUCCUCUUCUUCUUGAUG	GAUGAAGAGGAAGAGAAGUGA	Cleavage	(+)	1
ath-miR156i	AT3G02210	Chr3:409200-409276	3.5	-1	UGACAGAAGAGAGAGAGCAG	GUGUUCUCUCUUGUCUGUCC	Cleavage	(-)	1
ath-miR156j	AT3G02210	Chr3:409200-409276	3.5	-1	UGACAGAAGAGAGAGAGCAC	GUGUUCUCUCUUGUCUGUCC	Cleavage	(-)	1
ath-miR5020a	AT1G49390	Chr1:18280886-18280977	3.5	-1	UGGAAGAAGGUGAGACUUGCA	UUCAAGUCUCAUUUUUUUUUC	Cleavage	(+)	1
ath-miR5641	AT4G17950	Chr4:9967000-9967192	3.5	-1	UGGAAGAAGAUGAUAGAAU	ACUCUCUCAUCUUCUUCUC	Cleavage	(-)	1
ath-miR5658	AT1G25375	Chr1:8900135-8900201	3.5	-1	AUGAUGAUGAUGAUGAUGAAA	CUUCAACUUCAUUAUUAUUAU	Cleavage	(-)	1
ath-miR5661	AT1G76320	Chr1:28633988-28634079	3.5	-1	AGAGGUACAUCAUGUAGUCUG	UAGAGUAAAUGGUGUAUCUUU	Cleavage	(+)	1
ath-miR156b-3p	AT5G24930	Chr5:8590973-8591166	4	-1	UGCUCACCUCUCUUUCUGUCAGU	AUGAAGAGGAAGAGAAGUGAGUG	Cleavage	(+)	1
ath-miR156f-3p	AT3G63210	Chr3:23353525-23353922	4	-1	GCUCACUCUCUAUCCGUCACC	UGUGAAAGAUAGAGAGAGAGU	Cleavage	(-)	1
ath-miR2933a	AT5G60548	Chr5:24340275-24342494	4	-1	GAAAUCGGAGAGGAAAUUCGCC	GGUCAGUUUCCUUUCUAAUUUC	Cleavage	(+)	1
ath-miR2933a	AT5G59300	Chr5:23919511-23919653	4	-1	GAAAUCGGAGAGGAAAUUCGCC	CAAUAGUUUGCUCUCUGAUUUU	Cleavage	(-)	1
ath-miR2933b	AT5G60548	Chr5:24340275-24342494	4	-1	GAAAUCGGAGAGGAAAUUCGCC	GGUCAGUUUCCUUUCUAAUUUC	Cleavage	(+)	1
ath-miR2933b	AT5G59300	Chr5:23919511-23919653	4	-1	GAAAUCGGAGAGGAAAUUCGCC	CAAUAGUUUGCUCUCUGAUUUU	Cleavage	(-)	1
ath-miR2934-3p	AT3G15518	Chr3:5249665-5249755	4	-1	CAUCCAAGGUGUUUGUAGAAA	AGUCUUAGAACGUUUUGGAUG	Cleavage	(+)	1
ath-miR2937	AT5G47690	Chr5:19327102-19327319	4	-1	AUAAGAGCUGUUGAAGGAGUC	AGCUCCUCCAGAAGCUUUUGU	Translation	(+)	1
ath-miR3933	AT1G14710	Chr1:5061991-5062143	4	-1	AGAAGCAAAAUGACGACUCGG	AUGAAAUGUCGUUUUGUUUUU	Cleavage	(-)	1
ath-miR395b	AT3G02040	Chr3:348067-348366	4	-1	CUGAAGUGUUUGGGGGGACUC	GUAUCUCCCUGGACACUUUGG	Cleavage	(-)	1
ath-miR395c	AT3G02040	Chr3:348067-348366	4	-1	CUGAAGUGUUUGGGGGGACUC	GUAUCUCCCUGGACACUUUGG	Cleavage	(-)	1
ath-miR395f	AT3G02040	Chr3:348067-348366	4	-1	CUGAAGUGUUUGGGGGGACUC	GUAUCUCCCUGGACACUUUGG	Cleavage	(-)	1
ath-miR413	AT1G50270	Chr1:18623970-18624240	4	-1	AUAGUUUCUCUUGUUCUGCAC	UAACAAAACAACAGAAAUUAU	Translation	(+)	1
ath-miR415	AT1G30680	Chr1:10886275-10886485	4	-1	AACAGAGCAGAAACAGAACAU	UUGUUCUGUUUCU-CUCUGUC	Cleavage	(+)	2
ath-miR5014a-3p	AT5G58090	Chr5:23505276-23505438	4	-1	UUGUACAAAUUUAAGUGUACG	UGAGCAUUUGAAUUUGUACUA	Cleavage	(-)	1
ath-miR5019	AT4G12480	Chr4:7406113-7406228	4	-1	UGUUGGGAAAGAAAAACUCUU	CUUAGUUUUUUUUUUCCGUCA	Cleavage	(-)	1
ath-miR5021	AT1G25682	Chr1:9002259-9002448	4	-1	UGAGAAGAAGAAGAAGAAAA	CUUUUUUCUUUUUUUUCGCC	Cleavage	(-)	1
ath-miR5029	AT5G33290	Chr5:12561894-12562015	4	-1	AAUGAGAGAGAACACUGCAAA	UUUGCAUAGUUCUCUCUUGUA	Cleavage	(+)	1
ath-miR5633	AT3G48800	Chr3:18095655-18095799	4	-1	UAUGAUCAUCAGAAAACAGUG	UGUUGUUUUUUGUUGAUGAUA	Cleavage	(-)	1
ath-miR5634	AT3G06480	Chr3:1985344-1985453	4	-1	AGGGACUUUGUGAAUUUAGGG	UGAUAAAUUUACAAUGUUCUU	Cleavage	(-)	1
ath-miR5655	AT5G47690	Chr5:19327102-19327319	4	-1	AAGUAGACACAUAAGAAGGAG	AGCCUCUGUGUGUGUUUAUUU	Cleavage	(+)	1
ath-miR5657	AT4G17950	Chr4:9967000-9967192	4	-1	UGGACAAGGUUAGAUUUGGUG	UUUCAAAUUCAAUCUUGUUUA	Cleavage	(-)	1
ath-miR5998a	AT2G39010	Chr2:16293800-16294120	4	-1	ACAGUUUGUGUUUUGUUUUGU	AUAGAAAAAAACACAAACUCC	Cleavage	(+)	1
ath-miR5998b	AT2G39010	Chr2:16293800-16294120	4	-1	ACAGUUUGUGUUUUGUUUUGU	AUAGAAAAAAACACAAACUCC	Cleavage	(+)	1
ath-miR8183	AT5G03080	Chr5:723219-723315	4	-1	UUUAGUUGACGGAAUUGUGGC	GAAACAGUUUCGUAAAUUAAA	Cleavage	(+)	1
ath-miR8184	AT3G44740	Chr3:16295890-16296123	4	-1	UUUGGUCUGAUUACGAAUGUA	GUAAUUCAUGAUUAGAUUAAA	Cleavage	(-)	1
ath-miR830-3p	AT5G55140	Chr5:22382030-22382134	4	-1	UAACUAUUUUGAGAAGAAGUG	AGUUGAUUCUCAAAAAAGUUA	Cleavage	(+)	1
ath-miR833a-3p	AT1G73480	Chr1:27632561-27632801	4	-1	UAGACCGAUGUCAACAAACAAG	UAUGCUUCUUGACGUCGGUAUA	Cleavage	(+)	1
ath-miR838	AT2G46820	Chr2:19244874-19245116	4	-1	UUUUCUUCUACUUCUUGCACA	GGAGGAAGAAGAAGAAGAAGA	Translation	(+)	1
ath-miR863-5p	AT4G00440	Chr4:198526-198592	4	-1	UUAUGUCUUGUUGAUCUCAAU	CAUGAAAACAAAAAGAUAUAA	Translation	(+)	1
ath-miR156a-3p	AT5G24930	Chr5:8590973-8591166	4.5	-1	GCUCACUGCUCUUUCUGUCAGA	AUGAAGAGGAAGAGAAGUGAGU	Cleavage	(+)	1
ath-miR156a-5p	AT3G02210	Chr3:409200-409276	4.5	-1	UGACAGAAGAGAGUGAGCAC	GUGUUCUCUCUUGUCUGUCC	Cleavage	(-)	1
ath-miR156b-5p	AT3G02210	Chr3:409200-409276	4.5	-1	UGACAGAAGAGAGUGAGCAC	GUGUUCUCUCUUGUCUGUCC	Cleavage	(-)	1
ath-miR156c-5p	AT3G02210	Chr3:409200-409276	4.5	-1	UGACAGAAGAGAGUGAGCAC	GUGUUCUCUCUUGUCUGUCC	Cleavage	(-)	1
ath-miR156d-3p	AT1G47395	Chr1:17383292-17383410	4.5	-1	GCUCACUCUCUUUUUGUCAUAAC	UAGAAGAAAAAAAGAGAGAGAGA	Cleavage	(+)	1
ath-miR156d-5p	AT3G02210	Chr3:409200-409276	4.5	-1	UGACAGAAGAGAGUGAGCAC	GUGUUCUCUCUUGUCUGUCC	Cleavage	(-)	1
ath-miR156e	AT3G02210	Chr3:409200-409276	4.5	-1	UGACAGAAGAGAGUGAGCAC	GUGUUCUCUCUUGUCUGUCC	Cleavage	(-)	1
ath-miR156f-5p	AT3G02210	Chr3:409200-409276	4.5	-1	UGACAGAAGAGAGUGAGCAC	GUGUUCUCUCUUGUCUGUCC	Cleavage	(-)	1
ath-miR156g	AT3G02210	Chr3:409200-409276	4.5	-1	CGACAGAAGAGAGUGAGCAC	GUGUUCUCUCUUGUCUGUCC	Cleavage	(-)	1
ath-miR156g	AT3G60600	Chr3:22402442-22402615	4.5	-1	CGACAGAAGAGAGUGAGCAC	CUUUUAACUCUUUUCAGUCG	Cleavage	(+)	1
ath-miR156i	AT3G53100	Chr3:19684748-19684973	4.5	-1	UGACAGAAGAGAGAGAGCAG	UAUCUCUCUCUCUUCUCUCU	Cleavage	(-)	1
ath-miR156j	AT3G53100	Chr3:19684748-19684973	4.5	-1	UGACAGAAGAGAGAGAGCAC	UAUCUCUCUCUCUUCUCUCU	Cleavage	(-)	1
ath-miR164b-3p	AT5G60548	Chr5:24340275-24342494	4.5	-1	CAUGUGCCCAUCUUCACCAUC	AUUGGAGAAGACGGGCAUGUC	Translation	(+)	1
ath-miR169b-3p	AT1G22020	Chr1:7757345-7757442	4.5	-1	GGCAAGUUGUCCUUCGGCUACA	UGUAACCAGAGGAAAACUUGCU	Cleavage	(+)	1
ath-miR169g-3p	AT5G24060	Chr5:8129978-8130188	4.5	-1	UCCGGCAAGUUGACCUUGGCU	UUUCAAGGUUGGCUUAUUGGA	Cleavage	(-)	1
ath-miR2936	AT2G21170	Chr2:9070797-9070923	4.5	-1	CUUGAGAGAGAGAA-CACAGACG	AAGCUGUGAUUCUUUUUUUCAAU	Cleavage	(-)	1
ath-miR2936	AT5G14840	Chr5:4799214-4800008	4.5	-1	CUUGAGAGAGAGAACACAGACG	UGGUUGUCAUCUCUCUCUAGAG	Cleavage	(-)	1
ath-miR2939	AT4G10380	Chr4:6431237-6431308	4.5	-1	UAACGCACAACACUAAGCCAU	UUGGUUUGCUGUUGUAUGUUA	Cleavage	(-)	1
ath-miR3434-5p	AT5G03670	Chr5:950033-950172	4.5	-1	ACUUGGCUGAUUCUAUUAUU	AUUCAUAGGAUCAGUGAAGU	Cleavage	(+)	1
ath-miR3933	AT5G60548	Chr5:24340275-24342494	4.5	-1	AGAAGCAAAAUGACGACUCGG	UGGGGUCAUUGUUUUUCUUUU	Cleavage	(+)	1
ath-miR3933	AT4G04770	Chr4:2427803-2427979	4.5	-1	AGAAGCAAAAUGACGACUCGG	AGGGGUGGUCUUUGUGCUUCU	Translation	(-)	1
ath-miR407	AT3G10550	Chr3:3292927-3293122	4.5	-1	UUUAAAUCAUAUACUUUUGGU	CCUCAAAAUAUUUGAUUUAGA	Translation	(-)	1
ath-miR408-5p	AT2G30970	Chr2:13181823-13181989	4.5	-1	ACAGGGAACAAGCAGAGCAUG	CUUUUUGUGCUUGUUUCCUUU	Cleavage	(+)	1
ath-miR415	AT1G30680	Chr1:10886275-10886485	4.5	-1	AACAGAGCAGAAACAGAACAU	GUGAUCUUUUUGUGCUCUGUC	Translation	(+)	2
ath-miR418	AT1G13960	Chr1:4779214-4779414	4.5	-1	UAAUGUGAUGAUGAACUGACC	CUUUUGUUUAUUAUUACACUA	Cleavage	(+)	1
ath-miR4239	AT5G19010	Chr5:6344806-6345018	4.5	-1	UUUGUUAUUUUCGCAUGCUCC	GAAGCGUGAGAAGAUAAAAGA	Cleavage	(-)	1
ath-miR426	AT3G06080	Chr3:1834653-1834742	4.5	-1	UUUUGGAAAUUUGUCCUUACG	AAUAAAAGUAAAUUUCCGGGA	Cleavage	(-)	1
ath-miR5019	AT5G23150	Chr5:7792266-7792450	4.5	-1	UGUUGGGAAAGAAAAACUCUU	UAUUGUAUUUUUUUCCUGACA	Cleavage	(+)	1
ath-miR5021	AT3G02610	Chr3:557527-557829	4.5	-1	UGAGAAGAAGAAGAAGAAAA	UUUUUUUCUUUUUUCUUUCU	Cleavage	(+)	1
ath-miR5021	AT2G30970	Chr2:13181823-13181989	4.5	-1	UGAGAAGAAGAAGAAGAAAA	GAUUGUUUUCUUUCUUCUCA	Translation	(+)	1
ath-miR5021	AT3G02910	Chr3:650560-650911	4.5	-1	UGAGAAGAAGAAGAAGAAAA	GUUUGUUUGUUUUUUUCUCG	Cleavage	(+)	1
ath-miR5021	AT5G42880	Chr5:17194123-17194188	4.5	-1	UGAGAAGAAGAAGAAGAAAA	GUUUGUUUUUUCUUUUCUUA	Cleavage	(+)	1
ath-miR5024-5p	AT2G35680	Chr2:14996755-14996992	4.5	-1	AUGACAAGGCCAAGAUAUAACA	AAAAAAAACUUGGUUUUGUCGU	Cleavage	(-)	1
ath-miR5025	AT5G19080	Chr5:6380404-6380606	4.5	-1	ACUGUAUAUAUGUAAGUGACA	AGUCAGUAAUGUAUAUAUAGC	Cleavage	(+)	1
ath-miR5028	AT3G44740	Chr3:16295890-16296123	4.5	-1	AAUUGGGUUUAUGCUAGAGUU	UUUUCUAGUAUAUGCCAAAUU	Cleavage	(-)	1
ath-miR5029	AT3G02210	Chr3:409200-409276	4.5	-1	AAUGAGAGAGAACACUGCAAA	UUUUUUGUGUUCUCUCUUGUC	Cleavage	(-)	1
ath-miR5632-3p	AT5G59800	Chr5:24094362-24094478	4.5	-1	UUGGAUUUAUAGUUGGAUAAG	UGAAUCUAACUAUAAAUGAAA	Cleavage	(-)	1
ath-miR5636	AT4G35270	Chr4:16777335-16777479	4.5	-1	CGUAGUUGCAGAGCUUGACGG	CUACUAAGCUCUGCAAGUAUG	Cleavage	(-)	1
ath-miR5640	AT1G20440	Chr1:7084550-7084719	4.5	-1	UGAGAGAAGGAAUUAGAUUCA	GUAAUUUCAUUCUAUCUUUUA	Cleavage	(-)	1
ath-miR5640	AT1G09750	Chr1:3159118-3159216	4.5	-1	UGAGAGAAGGAAUUAGAUUCA	GCGAUGUGAUUUCUUUUCUAA	Cleavage	(+)	1
ath-miR5641	AT5G44520	Chr5:17934388-17934523	4.5	-1	UGGAAGAAGAUGAUAGAAUUA	UAAUUCUGUCGUCAUCUUAUA	Cleavage	(-)	1
ath-miR5647	AT5G23530	Chr5:7933064-7933224	4.5	-1	UCAAGUUUGAUGACGAUUCCA	UGGGUUGGUUAUUAAACUUGU	Cleavage	(-)	1
ath-miR5647	AT4G40042	Chr4:18559628-18559863	4.5	-1	UCAAGUUUGAUGACGAUUCCA	UCGAAUUCACACCAAACUUGA	Translation	(+)	1
ath-miR5649a	AT3G22380	Chr3:7919101-7919492	4.5	-1	AUUGAAUAUGUUGGUUACUAU	GUAGUAACUAGCGUUAUCAAU	Cleavage	(+)	1
ath-miR5649b	AT3G22380	Chr3:7919101-7919492	4.5	-1	AUUGAAUAUGUUGGUUACUAU	GUAGUAACUAGCGUUAUCAAU	Cleavage	(+)	1
ath-miR5652	AT1G68370	Chr1:25631744-25631949	4.5	-1	UUGAAUGUGAAUGAAUCGGGC	UGAUGAUAUAUUCAGAUUCAA	Cleavage	(-)	1
ath-miR5654-3p	AT2G46820	Chr2:19244874-19245116	4.5	-1	UGGAAGAUGCUUUGGGAUUUAUU	UUUUUAGCUCAAAGUAUCAUCCA	Cleavage	(+)	1
ath-miR5658	AT5G02850	Chr5:653521-653661	4.5	-1	AUGAUGAUGAUGAUGAUGAAA	CUUCAUCGUUAUCAGUAUCUU	Cleavage	(+)	1
ath-miR5658	AT5G15470	Chr5:5020952-5021351	4.5	-1	AUGAUGAUGAUGAUGAUGAAA	AUUUCUUAUUAAUAUCAUCAU	Translation	(-)	1
ath-miR5659	AT3G52525	Chr3:19475807-19476050	4.5	-1	CGAUGAAGGUCUUUGGAACGGUA	ACAUAUUUCAAAGGUUUUCGUCA	Cleavage	(+)	1
ath-miR5663-3p	AT1G68370	Chr1:25631744-25631949	4.5	-1	UGAGAAUGCAAAUCCUUAGCU	AUGGAAGGAUUUGUAUUCAUA	Cleavage	(-)	1
ath-miR5664	AT5G23530	Chr5:7933064-7933224	4.5	-1	AUAGUCAAUUUUAUCGGUCUG	CAAAACAAUGGAAUUGAUUAU	Cleavage	(-)	1
ath-miR5666	AT3G12280	Chr3:3913388-3913460	4.5	-1	AUGGGACAUCGAGCAUUUAAU	UAACUGUGUUCGGUGUCCCAU	Cleavage	(-)	1
ath-miR5998a	AT1G55680	Chr1:20804589-20804904	4.5	-1	ACAGUUUGUGUUUUGUUUUGU	AAAAGAGAAAACAUAAACUCA	Cleavage	(-)	1
ath-miR5998a	AT3G53100	Chr3:19684748-19684973	4.5	-1	ACAGUUUGUGUUUUGUUUUGU	CACAAAUAAGAGACAGAUUGU	Translation	(-)	1
ath-miR5998a	AT3G02610	Chr3:557527-557829	4.5	-1	ACAGUUUGUGUUUUGUUUUGU	AAAAAAAAAAAAAAAAAUUGU	Translation	(+)	1
ath-miR5998b	AT1G55680	Chr1:20804589-20804904	4.5	-1	ACAGUUUGUGUUUUGUUUUGU	AAAAGAGAAAACAUAAACUCA	Cleavage	(-)	1
ath-miR5998b	AT3G53100	Chr3:19684748-19684973	4.5	-1	ACAGUUUGUGUUUUGUUUUGU	CACAAAUAAGAGACAGAUUGU	Translation	(-)	1
ath-miR5998b	AT3G02610	Chr3:557527-557829	4.5	-1	ACAGUUUGUGUUUUGUUUUGU	AAAAAAAAAAAAAAAAAUUGU	Translation	(+)	1
ath-miR774b-5p	AT5G15470	Chr5:5020952-5021351	4.5	-1	UGAGAUGAAGAUAUGGGUGAU	CUUAUUAAUAUCAUCAUUUCA	Cleavage	(-)	1
ath-miR779.1	AT3G16290	Chr3:5521012-5521177	4.5	-1	UUCUGCUAUGUUGCUGCUCAU	UUGAGCUUCAAUAUAGUAUAA	Cleavage	(-)	1
ath-miR8165	AT3G02350	Chr3:481206-481451	4.5	-1	AAUGGAGGCAAGUGUGAAGGA	UAUUUCAUACUUGUCUGCCUU	Cleavage	(+)	1
ath-miR8178	AT2G33440	Chr2:14173303-14173516	4.5	-1	UAACAGAGUAAUUGUACAGUG	UACUGAAAAAUUGUUGUGUUA	Cleavage	(+)	1
ath-miR8178	AT4G18440	Chr4:10186209-10186332	4.5	-1	UAACAGAGUAAUUGUACAGUG	UCUUGUACCAUUGUUGUGUUA	Cleavage	(-)	1
ath-miR830-3p	AT2G26280	Chr2:11187732-11188014	4.5	-1	UAACUAUUUUGAGAAGAAGUG	CCUUUCUUCUGGAAAUGCUUA	Translation	(-)	1
ath-miR832-3p	AT5G23530	Chr5:7933064-7933224	4.5	-1	UUGAUUCCCAAUCCAAGCAAG	AAUGUUUGGGUUGGUUAUUAA	Cleavage	(-)	1
ath-miR837-5p	AT4G29905	Chr4:14626917-14627199	4.5	-1	AUCAGUUUCUUGUUCGUUUCA	AGAAACAGAGGAGAAACUGAA	Cleavage	(-)	1
ath-miR838	AT2G30470	Chr2:12980546-12980837	4.5	-1	UUUUCUUCUACUUCUUGCACA	AGUAGGAGAAGAAGAAGAGAA	Translation	(-)	1
ath-miR839-5p	AT3G16630	Chr3:5662481-5662654	4.5	-1	UACCAACCUUUCAUCGUUCCC	UUUAAGUGUGAAAGGUUGGUU	Cleavage	(-)	1
ath-miR848	AT4G04770	Chr4:2427803-2427979	4.5	-1	UGACAUGGGACUGCCUAAGCUA	AUGUUUUGGUAGUUUCAUGUGA	Cleavage	(-)	1
ath-miR862-5p	AT5G24060	Chr5:8129978-8130188	4.5	-1	UCCAAUAGGUCGAGCAUGUGC	UUUCAAGGUUGGCUUAUUGGA	Cleavage	(-)	1
ath-miR864-3p	AT3G02350	Chr3:481206-481451	4.5	-1	UAAAGUCAAUAAUACCUUGAAG	CUACAAUGUCUUGUUGUCUUUA	Cleavage	(+)	1
ath-miR866-5p	AT5G65480	Chr5:26177497-26177888	4.5	-1	UCAAGGAACGGAUUUUGUUAA	GAAGCAAGAUUCGUUCGUGGA	Cleavage	(+)	1
ath-miR866-5p	AT5G60548	Chr5:24340275-24342494	4.5	-1	UCAAGGAACGGAUUUUGUUAA	GGGACAAUACCCGUUUCUUGC	Cleavage	(+)	1
ath-miR869.1	AT1G20230	Chr1:7011916-7012115	4.5	-1	AUUGGUUCAAUUCUGGUGUUG	AUAAAUGGGAAUUGAAUUGAU	Cleavage	(+)	1
ath-miR156a-5p	AT3G60600	Chr3:22402442-22402615	5	-1	UGACAGAAGAGAGUGAGCAC	CUUUUAACUCUUUUCAGUCG	Cleavage	(+)	1
ath-miR156b-5p	AT3G60600	Chr3:22402442-22402615	5	-1	UGACAGAAGAGAGUGAGCAC	CUUUUAACUCUUUUCAGUCG	Cleavage	(+)	1
ath-miR156c-5p	AT3G60600	Chr3:22402442-22402615	5	-1	UGACAGAAGAGAGUGAGCAC	CUUUUAACUCUUUUCAGUCG	Cleavage	(+)	1
ath-miR156d-3p	AT5G15470	Chr5:5020952-5021351	5	-1	GCUCACUCUCUUUUUGUCAUAAC	CAUAAGAGAAAGAGAGAGAGAGA	Cleavage	(-)	1
ath-miR156d-3p	AT3G63210	Chr3:23353525-23353922	5	-1	GCUCACUCUCUUUUUGUCAUAAC	UAUGUGAAAGAUAGAGAGAGAGU	Cleavage	(-)	1
ath-miR156d-3p	AT2G30470	Chr2:12980546-12980837	5	-1	GCUCACUCUCUUUUUGUCAUAAC	AAGAAGAGAAAGAGAGAGAGAGA	Cleavage	(-)	1
ath-miR156d-5p	AT3G60600	Chr3:22402442-22402615	5	-1	UGACAGAAGAGAGUGAGCAC	CUUUUAACUCUUUUCAGUCG	Cleavage	(+)	1
ath-miR156e	AT3G60600	Chr3:22402442-22402615	5	-1	UGACAGAAGAGAGUGAGCAC	CUUUUAACUCUUUUCAGUCG	Cleavage	(+)	1
ath-miR156f-5p	AT3G60600	Chr3:22402442-22402615	5	-1	UGACAGAAGAGAGUGAGCAC	CUUUUAACUCUUUUCAGUCG	Cleavage	(+)	1
ath-miR156h	AT3G02210	Chr3:409200-409276	5	-1	UGACAGAAGAAAGAGAGCAC	GUGUUCUCUCUUGUCUGUCC	Translation	(-)	1
ath-miR156i	AT5G42880	Chr5:17194123-17194188	5	-1	UGACAGAAGAGAGAGAGCAG	UUGUUUUUUCUUUUCUUACA	Cleavage	(+)	1
ath-miR156i	AT1G47500	Chr1:17435065-17435147	5	-1	UGACAGAAGAGAGAGAGCAG	UUUUUUUUUCUCUUUUGGUA	Cleavage	(+)	1
ath-miR156j	AT5G42880	Chr5:17194123-17194188	5	-1	UGACAGAAGAGAGAGAGCAC	UUGUUUUUUCUUUUCUUACA	Cleavage	(+)	1
ath-miR156j	AT1G47500	Chr1:17435065-17435147	5	-1	UGACAGAAGAGAGAGAGCAC	UUUUUUUUUCUCUUUUGGUA	Cleavage	(+)	1
ath-miR157d	AT3G02210	Chr3:409200-409276	5	-1	UGACAGAAGAUAGAGAGCAC	GUGUUCUCUCUUGUCUGUCC	Translation	(-)	1
ath-miR157d	AT3G02350	Chr3:481206-481451	5	-1	UGACAGAAGAUAGAGAGCAC	UUGCUUGUUAU-UUCUGUCA	Cleavage	(+)	1
ath-miR159a	AT1G79210	Chr1:29795983-29796147	5	-1	UUUGGAUUGAAGGGAGCUCUA	AAGACCAACUUUCAAUCAAAA	Cleavage	(-)	1
ath-miR159b-3p	AT1G79210	Chr1:29795983-29796147	5	-1	UUUGGAUUGAAGGGAGCUCUU	AAGACCAACUUUCAAUCAAAA	Cleavage	(-)	1
ath-miR159c	AT1G79210	Chr1:29795983-29796147	5	-1	UUUGGAUUGAAGGGAGCUCCU	AAGACCAACUUUCAAUCAAAA	Cleavage	(-)	1
ath-miR160c-3p	AT1G55680	Chr1:20804589-20804904	5	-1	CGUACAAGGAGUCAAGCAUGA	UAAUG-UUCAUUUCUUGUAUG	Cleavage	(-)	1
ath-miR161.2	AT2G01950	Chr2:440699-440775	5	-1	UCAAUGCAUUGAAAGUGACUA	CUGGCUUUUUCAAUGCAUUUU	Cleavage	(-)	1
ath-miR162a-5p	AT2G36910	Chr2:15507068-15507382	5	-1	UGGAGGCAGCGGUUCAUCGAUC	AAUCUAUGAGCCUCUGCCUUUC	Translation	(+)	1
ath-miR162b-5p	AT2G36910	Chr2:15507068-15507382	5	-1	UGGAGGCAGCGGUUCAUCGAUC	AAUCUAUGAGCCUCUGCCUUUC	Translation	(+)	1
ath-miR163	AT3G02910	Chr3:650560-650911	5	-1	UUGAAGAGGACUUGGAACUUCGAU	AAAUAAGUUUUAGGUUGUUUUUGA	Cleavage	(+)	1
ath-miR166a-5p	AT2G17730	Chr2:7705556-7705751	5	-1	GGACUGUUGUCUGGCUCGAGG	CAUUGAGCCAGAAACUAGUUU	Cleavage	(+)	1
ath-miR166b-5p	AT2G17730	Chr2:7705556-7705751	5	-1	GGACUGUUGUCUGGCUCGAGG	CAUUGAGCCAGAAACUAGUUU	Cleavage	(+)	1
ath-miR167c-3p	AT3G53100	Chr3:19684748-19684973	5	-1	UAGGUCAUGCUGGUAGUUUCACC	GUAGAAACUACCAAUCUGGUCUG	Translation	(-)	1
ath-miR171b-3p	AT5G19080	Chr5:6380404-6380606	5	-1	UUGAGCCGUGCCAAUAUCACG	UUUGGUUUGGGCAUUGCUCAA	Cleavage	(+)	1
ath-miR171c-3p	AT5G19080	Chr5:6380404-6380606	5	-1	UUGAGCCGUGCCAAUAUCACG	UUUGGUUUGGGCAUUGCUCAA	Cleavage	(+)	1
ath-miR172b-5p	AT3G45930	Chr3:16883806-16883985	5	-1	GCAGCACCAUUAAGAUUCAC	GUGAUUGUUGAAGGUGUUGU	Cleavage	(+)	1
ath-miR172e-5p	AT3G45930	Chr3:16883806-16883985	5	-1	GCAGCACCAUUAAGAUUCAC	GUGAUUGUUGAAGGUGUUGU	Cleavage	(+)	1
ath-miR1886.1	AT4G03540	Chr4:1571506-1571636	5	-1	UGAGAGAAGUGAGAUGAAAUC	GAUCUAAUUUUAUGUCUCUCA	Cleavage	(+)	1
ath-miR1886.1	AT1G49950	Chr1:18494068-18494305	5	-1	UGAGAGAAGUGAGAUGAAAUC	UGUUUUAUUUGGCUCUUCUCA	Translation	(-)	1
ath-miR1886.1	AT1G24600	Chr1:8720700-8720812	5	-1	UGAGAGAAGUGAGAUGAAAUC	AUUUUAAUCUCCCUUCUCUAG	Translation	(+)	1
ath-miR1886.1	AT5G60548	Chr5:24340275-24342494	5	-1	UGAGAGAAGUGAGAUGAAAUC	UUGUUUAGCGUGCUUCUCUCA	Cleavage	(+)	1
ath-miR1887	AT2G29910	Chr2:12751141-12751247	5	-1	UACUAAGUAGAGUCUAAGAGA	CUUGUUAGACUUUGUUUAUUU	Cleavage	(-)	1
ath-miR1888b	AT4G16340	Chr4:9228266-9228726	5	-1	UUAGGCUAAGAUUUGUGAAGA	UUUCUGUAAUUCUUAGUUUAA	Cleavage	(-)	1
ath-miR2933a	AT5G59800	Chr5:24094362-24094478	5	-1	GAAAUCGGAGAGGAAAUUCGCC	UGUGUGCUUCCUCUCUAAUUUU	Cleavage	(-)	1
ath-miR2933b	AT5G59800	Chr5:24094362-24094478	5	-1	GAAAUCGGAGAGGAAAUUCGCC	UGUGUGCUUCCUCUCUAAUUUU	Cleavage	(-)	1
ath-miR2936	AT5G62910	Chr5:25252082-25252290	5	-1	CUUGAGAGAGAGAACACAGACG	AUGCUAUGUUCUCUUUUCUAAU	Cleavage	(+)	1
ath-miR2936	AT4G26910	Chr4:13519781-13519989	5	-1	CUUGAGAGAGAGAACACAGACG	ACGUUGCUUUCUUACUUUCAAG	Cleavage	(-)	1
ath-miR2939	AT1G30680	Chr1:10886275-10886485	5	-1	UAACGCACAACACUAAGCCAU	CUGAUUUGGUGUUGUGAAUUA	Cleavage	(+)	1
ath-miR3440b-3p	AT5G61990	Chr5:24899679-24899954	5	-1	UGGAUUGGUCAAGGGAAGCGU	AAACUCUUCUGGACCAAUUCA	Translation	(-)	1
ath-miR393a-3p	AT5G55200	Chr5:22396419-22396536	5	-1	AUCAUGCUAUCUCUUUGGAUU	AUUCCCAUAAGGUAGCAUGAC	Cleavage	(+)	1
ath-miR395a	AT3G02040	Chr3:348067-348366	5	-1	CUGAAGUGUUUGGGGGAACUC	GUAUCUCCCUGGACACUUUGG	Cleavage	(-)	1
ath-miR395a	AT2G37630	Chr2:15781532-15781739	5	-1	CUGAAGUGUUUGGGGGAACUC	GUGUUCCAUUUAUCACUUCAG	Translation	(-)	1
ath-miR395d	AT3G02040	Chr3:348067-348366	5	-1	CUGAAGUGUUUGGGGGAACUC	GUAUCUCCCUGGACACUUUGG	Cleavage	(-)	1
ath-miR395d	AT2G37630	Chr2:15781532-15781739	5	-1	CUGAAGUGUUUGGGGGAACUC	GUGUUCCAUUUAUCACUUCAG	Translation	(-)	1
ath-miR395e	AT3G02040	Chr3:348067-348366	5	-1	CUGAAGUGUUUGGGGGAACUC	GUAUCUCCCUGGACACUUUGG	Cleavage	(-)	1
ath-miR395e	AT2G37630	Chr2:15781532-15781739	5	-1	CUGAAGUGUUUGGGGGAACUC	GUGUUCCAUUUAUCACUUCAG	Translation	(-)	1
ath-miR397a	AT3G56820	Chr3:21039737-21039856	5	-1	UCAUUGAGUGCAGCGUUGAUG	ACUCAGCACUGUAAUCAAUCA	Cleavage	(-)	1
ath-miR398b-5p	AT5G19010	Chr5:6344806-6345018	5	-1	AGGGUUGAUAUGAGAACACAC	UUGUAUUCUUAAAACAACCUU	Translation	(-)	1
ath-miR398c-5p	AT5G19010	Chr5:6344806-6345018	5	-1	AGGGUUGAUAUGAGAACACAC	UUGUAUUCUUAAAACAACCUU	Translation	(-)	1
ath-miR402	AT4G17950	Chr4:9967000-9967192	5	-1	UUCGAGGCCUAUUAAACCUCUG	GACAUGUUAAGUAGGUUUCAAA	Cleavage	(-)	1
ath-miR403-5p	AT3G11170	Chr3:3502302-3502456	5	-1	UGUUUUGUGCUUGAAUCUAAUU	AUUUAAAUUCUAGCAAAAAGUA	Cleavage	(+)	1
ath-miR408-5p	AT1G30680	Chr1:10886275-10886485	5	-1	ACAGGGAACAAGCAGAGCAUG	UGUGAUCUUUUUGUGCUCUGU	Cleavage	(+)	1
ath-miR414	AT5G60548	Chr5:24340275-24342494	5	-1	UCAUCUUCAUCAUCAUCGUCA	AGAAGAAGAAGAUGAAGAAGA	Cleavage	(+)	1
ath-miR415	AT2G36910	Chr2:15507068-15507382	5	-1	AACAGAGCAGAAACAGAACAU	UUUUUUUCUUUCUGUUUUGAU	Cleavage	(+)	1
ath-miR415	AT1G47500	Chr1:17435065-17435147	5	-1	AACAGAGCAGAAACAGAACAU	GAGUUUUUUUUUUUCUCUUUU	Cleavage	(+)	1
ath-miR417	AT2G44600	Chr2:18409851-18410157	5	-1	GAAGGUAGUGAAUUUGUUCGA	AAGAGUGAAUUUACUUUUUUU	Cleavage	(+)	1
ath-miR417	AT5G61990	Chr5:24899679-24899954	5	-1	GAAGGUAGUGAAUUUGUUCGA	CUGGACCAAUUCAUUUACUUC	Cleavage	(-)	1
ath-miR418	AT2G44090	Chr2:18238361-18238511	5	-1	UAAUGUGAUGAUGAACUGACC	UAUUAUUUCAUCUACAUAUUA	Cleavage	(-)	1
ath-miR4221	AT3G56890	Chr3:21062739-21062976	5	-1	UUUUCCUCUGUUGAAUUCUUGC	AGAAGAGUAUAAGAGAGUAAAA	Translation	(-)	1
ath-miR4221	AT2G33440	Chr2:14173303-14173516	5	-1	UUUUCCUCUGUUGAAUUCUUGC	UAGAGAAUCCAAGAAGGGAAAG	Translation	(+)	1
ath-miR4228-3p	AT2G30470	Chr2:12980546-12980837	5	-1	UCGGAUGCGAAACGGUGGUGU	GAAGUACAGUUUUGUGUUUGA	Cleavage	(-)	1
ath-miR4239	AT3G06480	Chr3:1985344-1985453	5	-1	UUUGUUAUUUUCGCAUGCUCC	ACAGCAUUUAGAGAUGAUAAA	Cleavage	(-)	1
ath-miR4245	AT4G16340	Chr4:9228266-9228726	5	-1	ACAAAGUUUUAUACUGACAAU	AUUGUUUUUAUAUAACUUUGA	Cleavage	(-)	1
ath-miR4245	AT4G04770	Chr4:2427803-2427979	5	-1	ACAAAGUUUUAUACUGACAAU	UUCUUCUGAGUAAAACUUUGU	Cleavage	(-)	1
ath-miR426	AT5G03650	Chr5:937536-937676	5	-1	UUUUGGAAAUUUGUCCUUACG	GGUAAUGGAAAAUAUCUAAAA	Cleavage	(+)	1
ath-miR426	AT4G20150	Chr4:10888186-10888296	5	-1	UUUUGGAAAUUUGUCCUUACG	UAUGAGAAUAGAGUUUCAGAA	Cleavage	(-)	1
ath-miR5012	AT2G28950	Chr2:12431419-12431717	5	-1	UUUUACUGCUACUUGUGUUCC	AUAGUAAAAGAAGCAGUAAUA	Translation	(-)	1
ath-miR5014a-3p	AT1G48400	Chr1:17881909-17882023	5	-1	UUGUACAAAUUUAAGUGUACG	CUUGCACAUCAAAUUGUAUAA	Cleavage	(-)	1
ath-miR5017-5p	AT1G65440	Chr1:24306715-24306892	5	-1	AUUUGUUACUAAUUUGGAAUG	AUAAACACAUUAGUAGUAAAU	Cleavage	(-)	1
ath-miR5017-5p	AT5G02710	Chr5:614269-614500	5	-1	AUUUGUUACUAAUUUGGAAUG	UUAUCCAUGUUAUUAAUAGAU	Cleavage	(+)	1
ath-miR5021	AT3G56210	Chr3:20853669-20853777	5	-1	UGAGAAGAAGAAGAAGAAAA	UUUUUUUCUUUCUCUCCUCU	Cleavage	(-)	1
ath-miR5021	AT2G46040	Chr2:18935300-18935371	5	-1	UGAGAAGAAGAAGAAGAAAA	UUUUUUUCUGUUUUUUUCCA	Translation	(-)	1
ath-miR5021	AT3G10550	Chr3:3292927-3293122	5	-1	UGAGAAGAAGAAGAAGAAAA	UCUUCUUUUUUUUUUACUCU	Cleavage	(-)	1
ath-miR5021	AT1G13960	Chr1:4779214-4779414	5	-1	UGAGAAGAAGAAGAAGAAAA	CUUUUUUCUUUUGUUUAUUA	Cleavage	(+)	1
ath-miR5021	AT4G17950	Chr4:9967000-9967192	5	-1	UGAGAAGAAGAAGAAGAAAA	CUCUCAUCUUCUUCUCCUUU	Cleavage	(-)	1
ath-miR5021	AT1G16670	Chr1:5699581-5699770	5	-1	UGAGAAGAAGAAGAAGAAAA	CUCUCUUCUU-UUUUUCUCG	Translation	(+)	1
ath-miR5021	AT1G24170	Chr1:8557216-8557369	5	-1	UGAGAAGAAGAAGAAGAAAA	GUUUCAAUCUUUUCUUCUUA	Cleavage	(-)	1
ath-miR5022	AT3G56890	Chr3:21062739-21062976	5	-1	GUCAUGGGGUAUGAUCGAAUG	AAAUCGUAUGUACCUCGUGAC	Cleavage	(-)	1
ath-miR5023	AT3G04184	Chr3:1099837-1099907	5	-1	AUUGGUAGUGGAUAAGGGGG	UUCCUUUUUCCAUUUCCAGU	Cleavage	(-)	1
ath-miR5026	AT2G19460	Chr2:8431979-8432158	5	-1	ACUCAUAAGAUCGUGACACGU	GUGUGUUCUUAGCUUAUGAGU	Translation	(+)	1
ath-miR5029	AT5G48480	Chr5:19645859-19646003	5	-1	AAUGAGAGAGAACACUGCAAA	UAAUCUGUGUUCUUUGUCAUU	Cleavage	(+)	1
ath-miR5029	AT2G46820	Chr2:19244874-19245116	5	-1	AAUGAGAGAGAACACUGCAAA	UAUGAGAUGUUUUGUUUCAUU	Cleavage	(+)	1
ath-miR5595a	AT3G53100	Chr3:19684748-19684973	5	-1	ACAUAUGAUCUGCAUCUUUGC	AAUAAGAGACAGAUUGUGUGU	Cleavage	(-)	1
ath-miR5640	AT5G13180	Chr5:4197657-4197863	5	-1	UGAGAGAAGGAAUUAGAUUCA	CGAAUUUCAAUUCUUCUCCCA	Cleavage	(+)	1
ath-miR5640	AT2G21170	Chr2:9070797-9070923	5	-1	UGAGAGAAGGAAUUAGAUUCA	AAGCUGUGAUUCUUUUUUUCA	Cleavage	(-)	1
ath-miR5640	AT3G56210	Chr3:20853669-20853777	5	-1	UGAGAGAAGGAAUUAGAUUCA	CCAAACUAUUUUUUUCUUUCU	Cleavage	(-)	1
ath-miR5640	AT1G49390	Chr1:18280886-18280977	5	-1	UGAGAGAAGGAAUUAGAUUCA	CAAGUCUCAUUUUUUUUUCCA	Cleavage	(+)	1
ath-miR5640	AT4G17950	Chr4:9967000-9967192	5	-1	UGAGAGAAGGAAUUAGAUUCA	AAAGACUUGUUCUUUUUCUCC	Cleavage	(-)	1
ath-miR5641	AT5G47030	Chr5:19092300-19092419	5	-1	UGGAAGAAGAUGAUAGAAUUA	UUACUGUGUUUUCUUCUUCUA	Translation	(+)	1
ath-miR5641	AT5G24060	Chr5:8129978-8130188	5	-1	UGGAAGAAGAUGAUAGAAUUA	AUGUUGUUUCAUUGUUUUCCA	Cleavage	(-)	1
ath-miR5648-3p	AT3G56890	Chr3:21062739-21062976	5	-1	AUCUGAAGAAAAUAGCGGCAU	AUGCCUUUAUAUUCUUUAGUU	Translation	(-)	1
ath-miR5649a	AT1G20810	Chr1:7233418-7233568	5	-1	AUUGAAUAUGUUGGUUACUAU	UAAAUAACCGGUAUAUUUGUU	Cleavage	(+)	1
ath-miR5649a	AT2G17730	Chr2:7705556-7705751	5	-1	AUUGAAUAUGUUGGUUACUAU	UAAGUA-CUUACGUAUUUAAU	Cleavage	(+)	1
ath-miR5649b	AT1G20810	Chr1:7233418-7233568	5	-1	AUUGAAUAUGUUGGUUACUAU	UAAAUAACCGGUAUAUUUGUU	Cleavage	(+)	1
ath-miR5649b	AT2G17730	Chr2:7705556-7705751	5	-1	AUUGAAUAUGUUGGUUACUAU	UAAGUA-CUUACGUAUUUAAU	Cleavage	(+)	1
ath-miR5652	AT5G61990	Chr5:24899679-24899954	5	-1	UUGAAUGUGAAUGAAUCGGGC	GACCAAUUCAUUUAC-UUCAG	Cleavage	(-)	1
ath-miR5654-3p	AT4G00955	Chr4:413042-413302	5	-1	UGGAAGAUGCUUUGGGAUUU-AUU	AAUCAAGAACUUAAGCAUUUUCCA	Cleavage	(+)	1
ath-miR5655	AT5G19080	Chr5:6380404-6380606	5	-1	AAGUAGACACAUAAGAAGGAG	UCUCUUUGUAUCUUUCUACUU	Translation	(+)	1
ath-miR5661	AT4G13650	Chr4:7939108-7939196	5	-1	AGAGGUACAUCAUGUAGUCUG	AUGAAUGAUUGAUGUGCUUCU	Cleavage	(-)	1
ath-miR5663-3p	AT5G65060	Chr5:25991179-25991370	5	-1	UGAGAAUGCAAAUCCUUAGCU	UUCAAAAGAUUUGCUUUCUUU	Cleavage	(+)	1
ath-miR5995b	AT3G53100	Chr3:19684748-19684973	5	-1	ACAUAUGAUCUGCAUCUUUGC	AAUAAGAGACAGAUUGUGUGU	Cleavage	(-)	1
ath-miR5996	AT5G03495	Chr5:873336-873414	5	-1	UGACAUCCAGAUAGAAGCUUUG	AUAUGUCUUUCUCUGGAUGUUA	Cleavage	(-)	1
ath-miR5997	AT2G20340	Chr2:8782663-8782785	5	-1	UGAAACCAAGUAGCUAAAUAG	UAUUUUAUCUAUUUGGUUUGG	Cleavage	(+)	1
ath-miR5998a	AT3G02910	Chr3:650560-650911	5	-1	ACAGUUUGUGUUUUGUUUUGU	AAAAAAAAAAACACAAACACA	Cleavage	(+)	1
ath-miR5998a	AT3G59670	Chr3:22042576-22042656	5	-1	ACAGUUUGUGU-UUUGUUUUGU	UUAGAGUGAAGACACAAACUGU	Translation	(+)	1
ath-miR5998a	AT5G14840	Chr5:4799214-4800008	5	-1	ACAGUUUGUGUUUUGUUUUGU	GUUAAGCAAAGCACGUGUUGU	Cleavage	(-)	2
ath-miR5998a	AT5G14840	Chr5:4799214-4800008	5	-1	ACAGUUUGUGUUUUGUUUUGU	GUUAAGCAAAGCACGUGUUGU	Cleavage	(-)	2
ath-miR5998b	AT3G02910	Chr3:650560-650911	5	-1	ACAGUUUGUGUUUUGUUUUGU	AAAAAAAAAAACACAAACACA	Cleavage	(+)	1
ath-miR5998b	AT3G59670	Chr3:22042576-22042656	5	-1	ACAGUUUGUGU-UUUGUUUUGU	UUAGAGUGAAGACACAAACUGU	Translation	(+)	1
ath-miR5998b	AT5G14840	Chr5:4799214-4800008	5	-1	ACAGUUUGUGUUUUGUUUUGU	GUUAAGCAAAGCACGUGUUGU	Cleavage	(-)	2
ath-miR5998b	AT5G14840	Chr5:4799214-4800008	5	-1	ACAGUUUGUGUUUUGUUUUGU	GUUAAGCAAAGCACGUGUUGU	Cleavage	(-)	2
ath-miR778	AT3G06500	Chr3:2015632-2015696	5	-1	UGGCUUGGUUUAUGUACACCG	AUGUGGAUAUAAAUAAAACCA	Cleavage	(+)	1
ath-miR781a	AT2G47690	Chr2:19552088-19552263	5	-1	UUAGAGUUUUCUGGAUACUUA	UUUGUAUCUUGGAAUCUCUAA	Cleavage	(+)	1
ath-miR781b	AT2G47690	Chr2:19552088-19552263	5	-1	UUAGAGUUUUCUGGAUACUUA	UUUGUAUCUUGGAAUCUCUAA	Cleavage	(+)	1
ath-miR8121	AT3G19290	Chr3:6689862-6690053	5	-1	AAAGUAUAAUGGUUUAGUGGUUUG	UCUGUUAUUGACUUAUUGUGCUUU	Cleavage	(+)	1
ath-miR8165	AT2G30970	Chr2:13181823-13181989	5	-1	AAUGGAGGCAAGUGUGAAGGA	CUUUUUGUGCUUGUUUCCUUU	Cleavage	(+)	1
ath-miR8166	AT5G03670	Chr5:950033-950172	5	-1	AGAGAGUGUAGAAAGUUUCUCA	AGUGAAGUUCUCUAAACUCUCG	Cleavage	(+)	1
ath-miR8168	AT2G05710	Chr2:2146584-2146670	5	-1	AGGUGCUGAGUGUGCUAGUGC	UCACAAGCGUAUUCAGCAGCA	Cleavage	(+)	1
ath-miR8170-3p	AT1G43160	Chr1:16264724-16264830	5	-1	UUGCUUAAAGAUUUUCUAUGU	GUAUAUAAAAUUUGUGAUCAA	Cleavage	(+)	1
ath-miR8171	AT5G13180	Chr5:4197657-4197863	5	-1	AUAGGUGGGCCAGUGGUAGGA	UUCUCCCAACGGUCCACUUAU	Cleavage	(+)	1
ath-miR8177	AT1G55680	Chr1:20804589-20804904	5	-1	GUGUGAUGAUGUGUCAUUUAUA	AUCAAAUUAUAUAUCAUGAUGU	Cleavage	(-)	1
ath-miR8178	AT5G15470	Chr5:5020952-5021351	5	-1	UAACAGAGUAAUUGUACAGUG	ACUUAUACACUUGUUUUGUUG	Cleavage	(-)	1
ath-miR8181	AT3G56210	Chr3:20853669-20853777	5	-1	UGGGGGUGGGGGGGUGACAG	UUUUUUCUUUCCCAUUCCCA	Cleavage	(-)	1
ath-miR8184	AT5G24060	Chr5:8129978-8130188	5	-1	UUUGGUCUGAUUACGAAUGUA	AUCGUUUGUGGUCAGACAAGC	Cleavage	(-)	1
ath-miR824-3p	AT4G03100	Chr4:1376058-1376253	5	-1	CCUUCUCAUCGAUGGUCUAGA	UAGGGAUUGUUGGUGAGAAGU	Cleavage	(+)	1
ath-miR824-3p	AT3G46010	Chr3:16909304-16909536	5	-1	CCUUCUCAUCGAUGGUCUAGA	GGUAUAUCAUUGAUGAAAUGG	Cleavage	(-)	1
ath-miR826b	AT5G60548	Chr5:24340275-24342494	5	-1	UGGUUUUGGACACGUGAAAAU	AUGUUCGCGUGUGUAAAAUUG	Cleavage	(+)	1
ath-miR827	AT1G11260	Chr1:3780158-3780272	5	-1	UUAGAUGACCAUCAACAAACU	UAUUUAUUGGUGUUUAUAUAA	Cleavage	(+)	1
ath-miR830-3p	AT5G60548	Chr5:24340275-24342494	5	-1	UAACUAUUUUGAGAAGAAGUG	GGUUUCAUUUUAGAGAAGUUA	Cleavage	(+)	1
ath-miR831-5p	AT5G19080	Chr5:6380404-6380606	5	-1	AGAAGCGUACAAGGAGAUGAGG	AACUUUCUCUUUGUAUCUUUCU	Cleavage	(+)	1
ath-miR831-5p	AT2G37380	Chr2:15687836-15688004	5	-1	AGAAGCGUACAAGGAGAUGAGG	UUAGAUUCUUUUGUGUGCUUUU	Cleavage	(+)	1
ath-miR833a-3p	AT4G29905	Chr4:14626917-14627199	5	-1	UAGACCGAUGUCAACAAACAAG	GGUGAGUGGUGACAUUGGUCAA	Cleavage	(-)	1
ath-miR835-3p	AT4G12545	Chr4:7434746-7434861	5	-1	UGGAGAAGAUACGCAAGAAAG	UGUUCCUUCGUCUCUUCUUUG	Translation	(+)	1
ath-miR837-5p	AT4G16340	Chr4:9228266-9228726	5	-1	AUCAGUUUCUUGUUCGUUUCA	GAAGAUGAAGAGGAGGUUGGU	Cleavage	(-)	1
ath-miR838	AT1G73480	Chr1:27632561-27632801	5	-1	UUUUCUUCUACUUCUUGCACA	CAACUCAGAAGUAGAAGGAAG	Cleavage	(+)	1
ath-miR838	AT1G19850	Chr1:6891213-6891370	5	-1	UUUUCUUCUACUUCUUGCACA	UCUCCAACUGGUAGAGGAGAA	Cleavage	(+)	1
ath-miR840-5p	AT2G37380	Chr2:15687836-15688004	5	-1	ACACUGAAGGACCUAAACUAAC	UGUAAUUUAGAUUCUUUUGUGU	Cleavage	(+)	1
ath-miR843	AT2G28840	Chr2:12380548-12380741	5	-1	UUUAGGUCGAGCUUCAUUGGA	UUUGAUUAAGUUUGGCCAAAA	Cleavage	(+)	1
ath-miR845b	AT1G24764	Chr1:8759543-8759856	5	-1	UCGCUCUGAUACCAAAUUGAUG	CAUAGAUUUGGUGUUAAAGUGG	Cleavage	(-)	1
ath-miR851-3p	AT2G37220	Chr2:15634502-15634953	5	-1	UGGGUGGCAAACAAAGACGAC	UUCGCCUAUGUUUGUUGCCUU	Cleavage	(-)	1
ath-miR851-3p	AT1G24764	Chr1:8759543-8759856	5	-1	UGGGUGGCAAACAAAGACGAC	CUUUUAUUUGUUUGUUACUCU	Cleavage	(-)	1
ath-miR851-3p	AT1G07610	Chr1:2341896-2342076	5	-1	UGGGUGGCAAACAAAGACGAC	AAUGUUUUUAUUUGUAACCUA	Cleavage	(+)	1
ath-miR854a	AT3G02210	Chr3:409200-409276	5	-1	GAUGAGGAUAGGGAGGAGGAG	UCUCUCUUGUCUGUCCUCUUC	Cleavage	(-)	1
ath-miR854b	AT3G02210	Chr3:409200-409276	5	-1	GAUGAGGAUAGGGAGGAGGAG	UCUCUCUUGUCUGUCCUCUUC	Cleavage	(-)	1
ath-miR854c	AT3G02210	Chr3:409200-409276	5	-1	GAUGAGGAUAGGGAGGAGGAG	UCUCUCUUGUCUGUCCUCUUC	Cleavage	(-)	1
ath-miR854d	AT3G02210	Chr3:409200-409276	5	-1	GAUGAGGAUAGGGAGGAGGAG	UCUCUCUUGUCUGUCCUCUUC	Cleavage	(-)	1
ath-miR854e	AT3G02210	Chr3:409200-409276	5	-1	GAUGAGGAUAGGGAGGAGGAG	UCUCUCUUGUCUGUCCUCUUC	Cleavage	(-)	1
ath-miR857	AT1G50270	Chr1:18623970-18624240	5	-1	UUUUGUAUGUUGAAGGUGUAU	UUGCAACUUUAACAUCUGAAG	Cleavage	(+)	1
ath-miR862-5p	AT3G02610	Chr3:557527-557829	5	-1	UCCAAUAGGUCGAGCAUGUGC	AUUUGUGUUUGAUCUGUUGGU	Cleavage	(+)	1
ath-miR863-3p	AT3G02350	Chr3:481206-481451	5	-1	UUGAGAGCAACAAGACAUAAU	ACAAUGUCUUGUUGUCUUUAU	Cleavage	(+)	1
ath-miR863-5p	AT5G22130	Chr5:7337220-7337294	5	-1	UUAUGUCUUGUUGAUCUCAAU	UAUAAAAACAACAGGUCAUAA	Cleavage	(-)	1
ath-miR864-3p	AT3G61440	Chr3:22737831-22738089	5	-1	UAAAGUCAAUAAUACCUUGAAG	AAUCACAGUAUUGUUGAUGUUG	Cleavage	(+)	1
ath-miR865-3p	AT1G73480	Chr1:27632561-27632801	5	-1	UUUUUCCUCAAAUUUAUCCAA	ACUGAGAAACGUGAGGAAAAA	Translation	(+)	1
ath-miR865-5p	AT3G10550	Chr3:3292927-3293122	5	-1	AUGAAUUUGGAUCUAAUUGAG	AAAUAUUUGAUUUAGAUUUAU	Cleavage	(-)	1
ath-miR865-5p	AT1G68370	Chr1:25631744-25631949	5	-1	AUGAAUUUGGAUCUAAUUGAG	UAUAUUCAGAUUCAAAAUUAU	Cleavage	(-)	1
ath-miR870-5p	AT1G80120	Chr1:30140109-30140205	5	-1	AAGAACAUCAAAUUAGAAUGU	GUAAUCUGGUUUGAAUUUCUU	Cleavage	(+)	1
